# Supplementary material
Source: Elsevier journal article supplement (https://www.sciencedirect.com/science/article/pii/S2530064420300195)

**Supplementary Material 3. Bioclimatic variables range and combinations novelty under climate change scenarios.** There was no bioclimatic combination novelty under any scenario or time, but there was novelty in bioclimatic variables range. Dark blue= there is no novelty in bioclimatic range, Other colors= represent the variable which range is being changed under a specific scenario: bio01: Annual mean temperature, bio04: Temperature seasonality, bio05: Maximum temperature of warmest month, bio07: Temperature annual range, bio10: Mean temperature of warmest quarter, bio11: Mean temperature of coldest quarter, bio12: Annual precipitation, bio13: Precipitation of wettest month, bio15: Precipitation seasonality.

**Short-term**

**(2015-2039)**

**RCP 4.5**


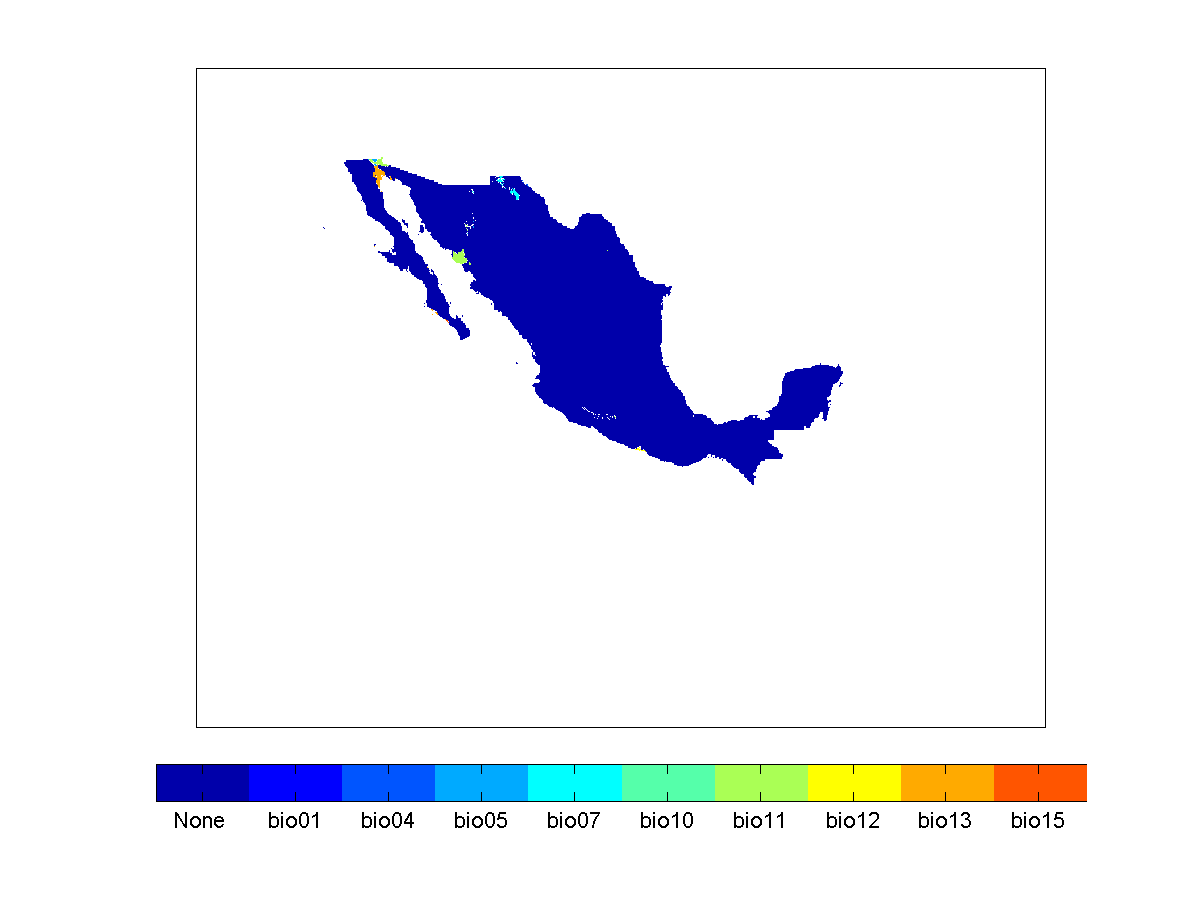


**Short-term**

**(2015-2039)**

**RCP 8.5**

**
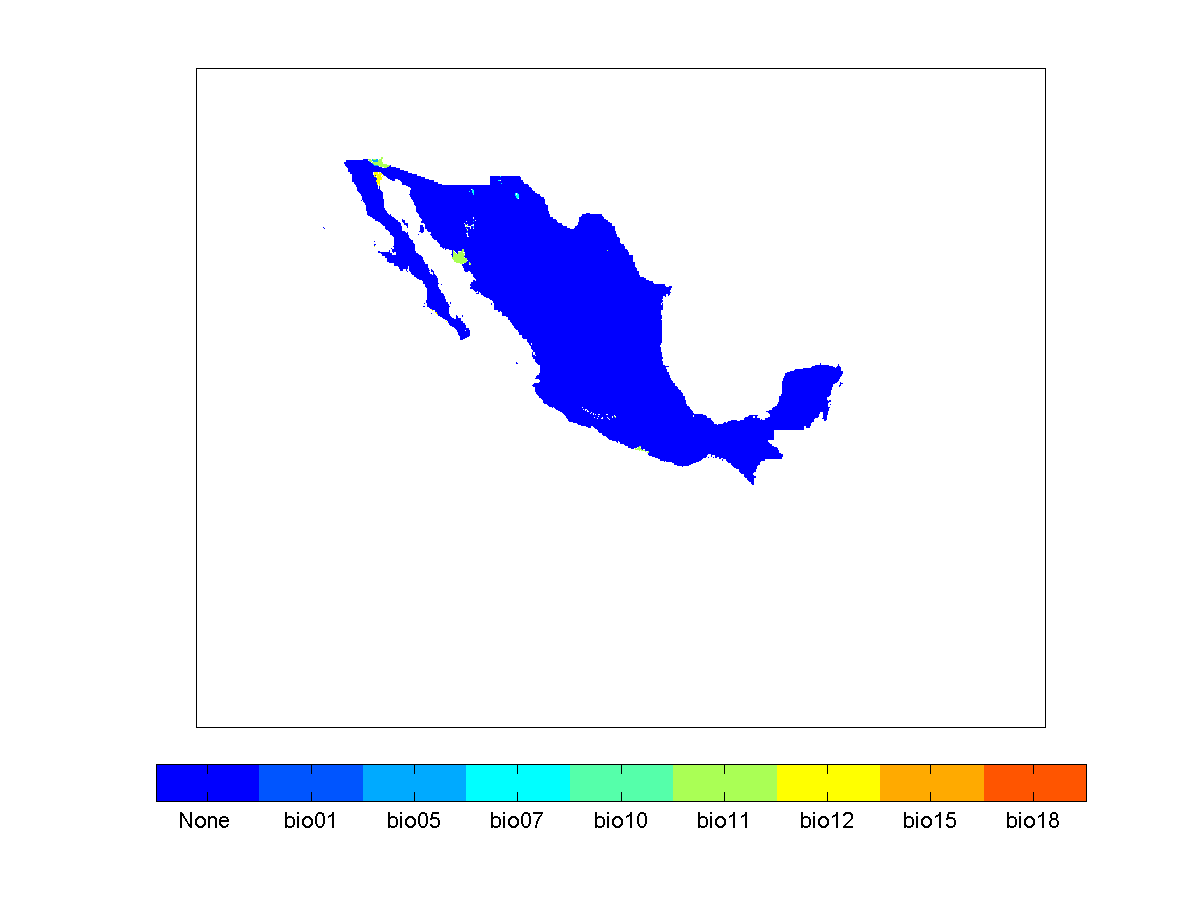
**

**Long-term**

**(2075-2099)**

**RCP 4.5**

**
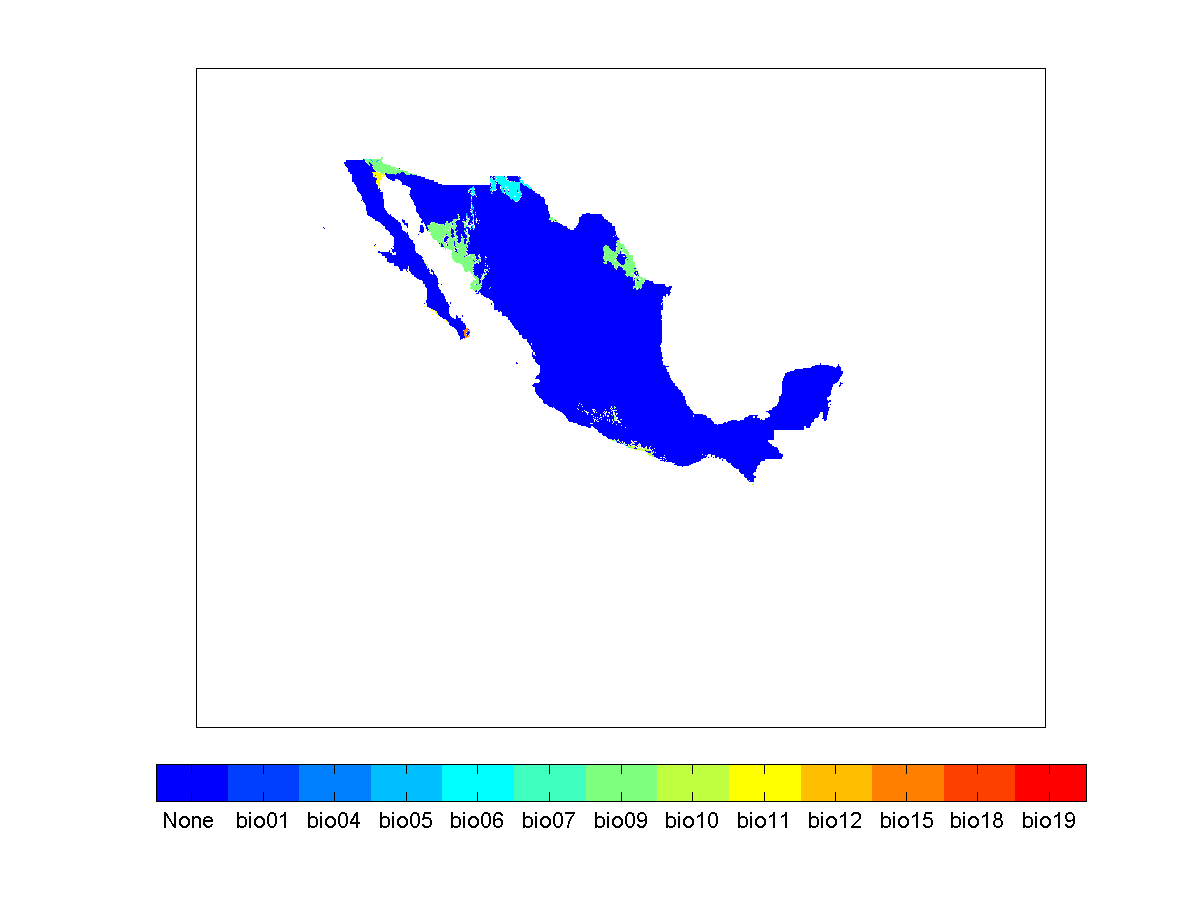
**

**Long-term**

**(2075-2099)**

**RCP 8.5**


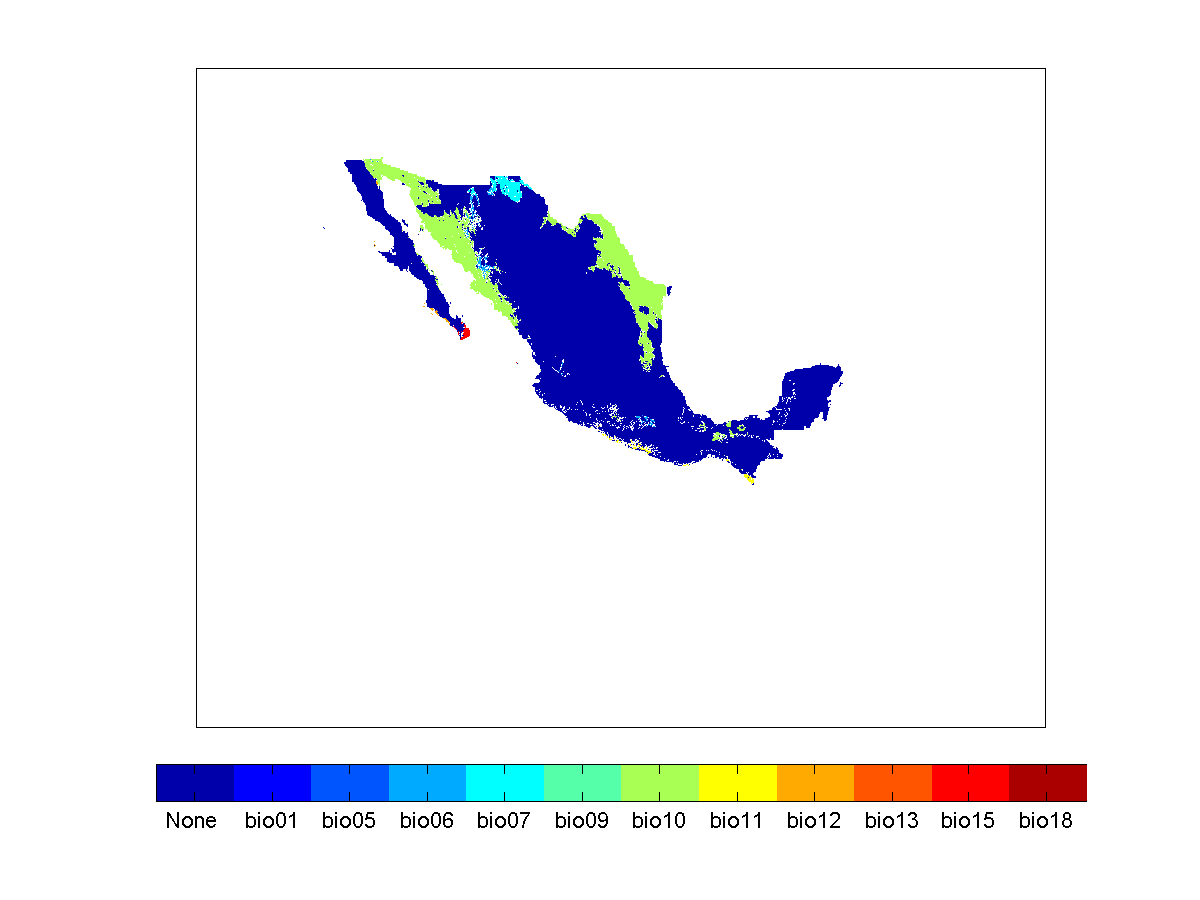

Supplement: mmc3 [file S2530064420300195:mmc3.docx]
