# Supplementary material
Source: Elsevier journal article supplement (https://www.sciencedirect.com/science/article/pii/S2530064420300195)
Supplement: mmc4 [file S2530064420300195:mmc4.docx]

**Supplementary Material 4. Potential Distribution Area under current and future climatic conditions for each evaluated species.** Gray area= Natural Protected Areas (NPA), Red triangles= species’ records and Blue area= Potential Distribution Area (PDA).

*Centuroides baergi*

1. Records
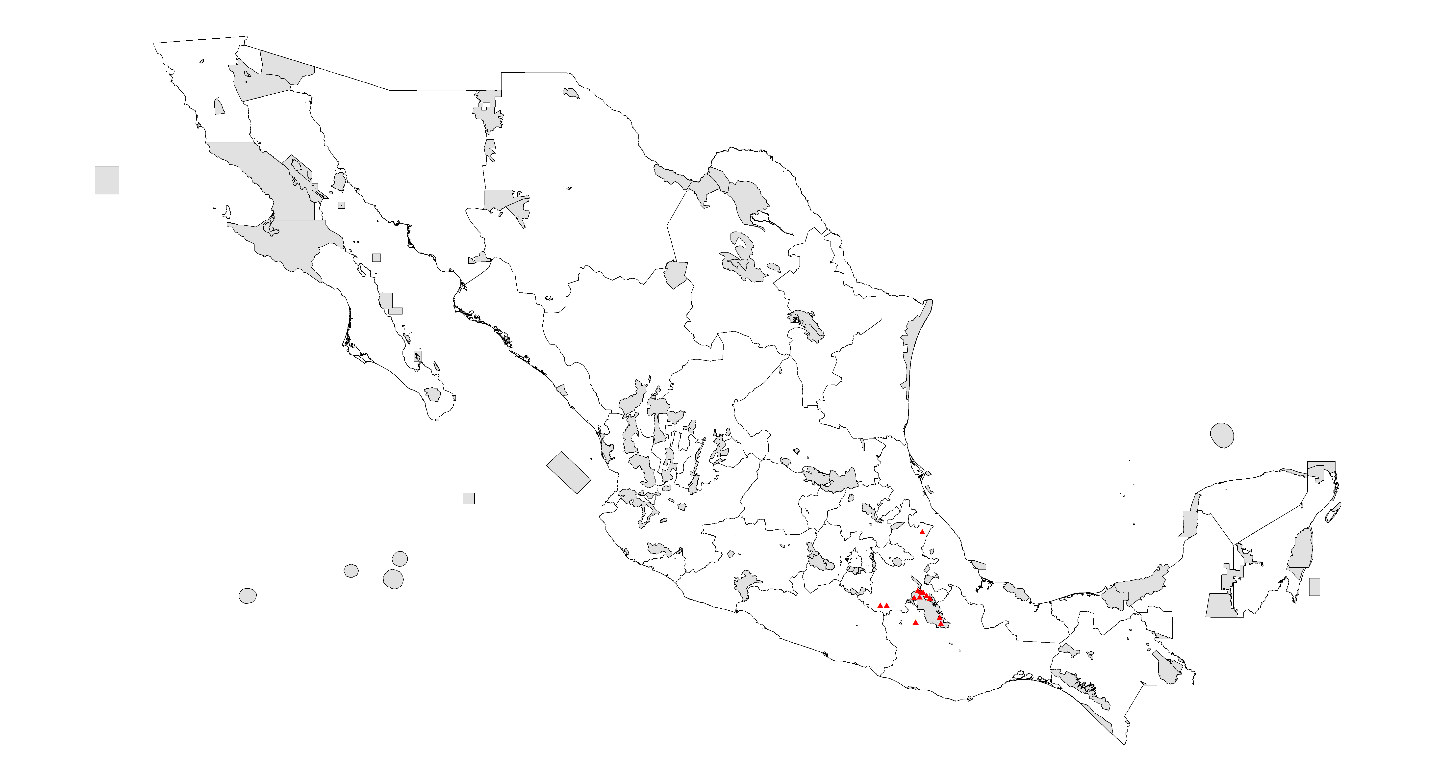

2. PDA under current climatic conditions
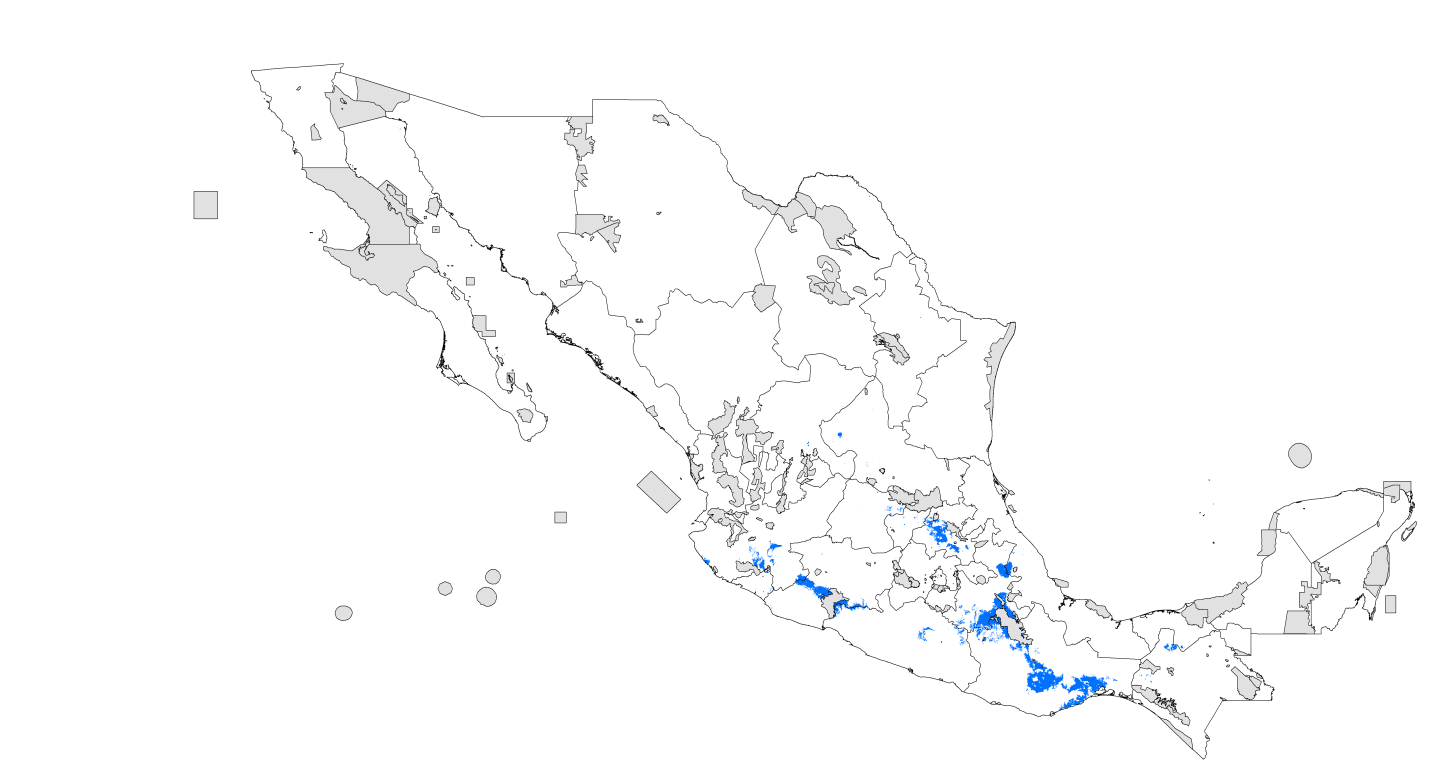

3. PDA 2020 RCP 4.5 W/m2


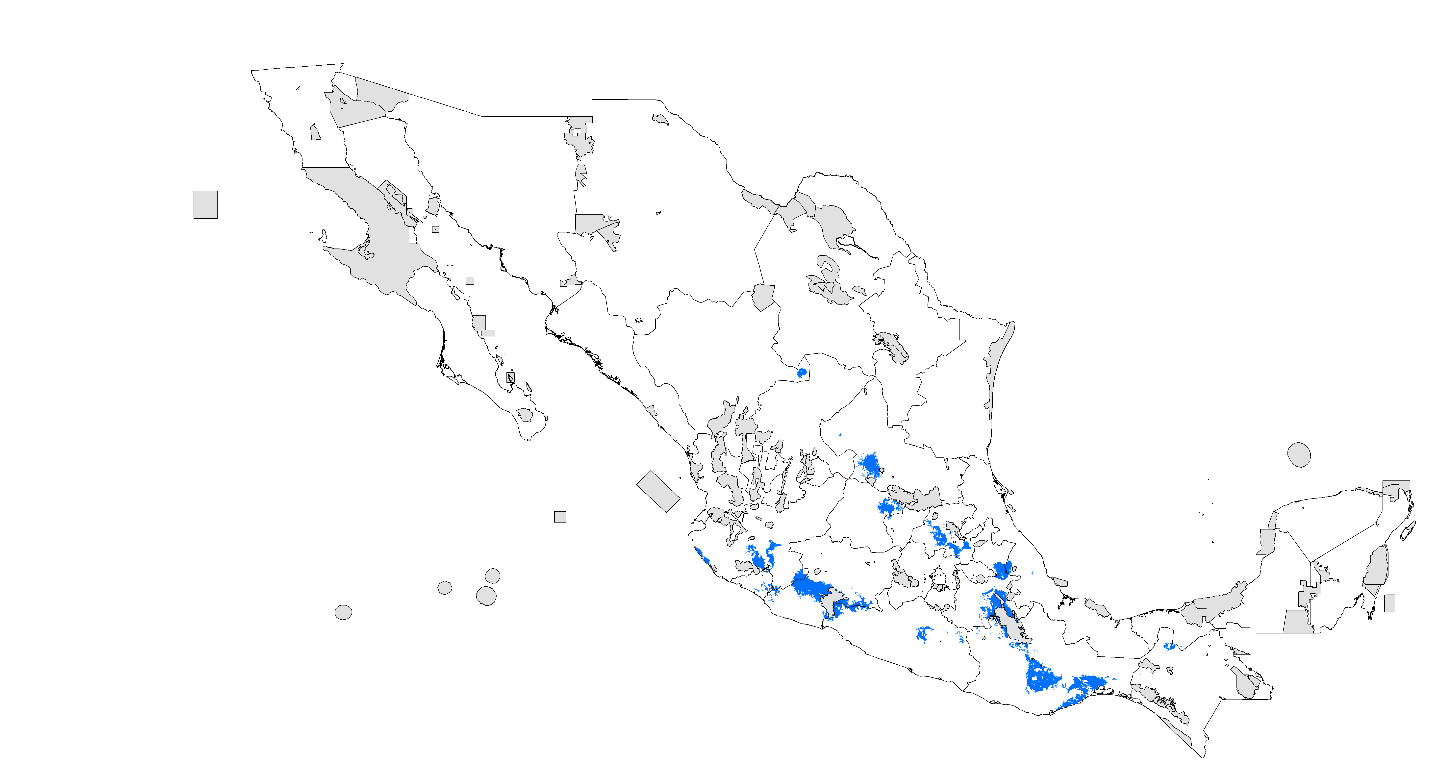


1. PDA 2020 RCP 8.5 W/m2


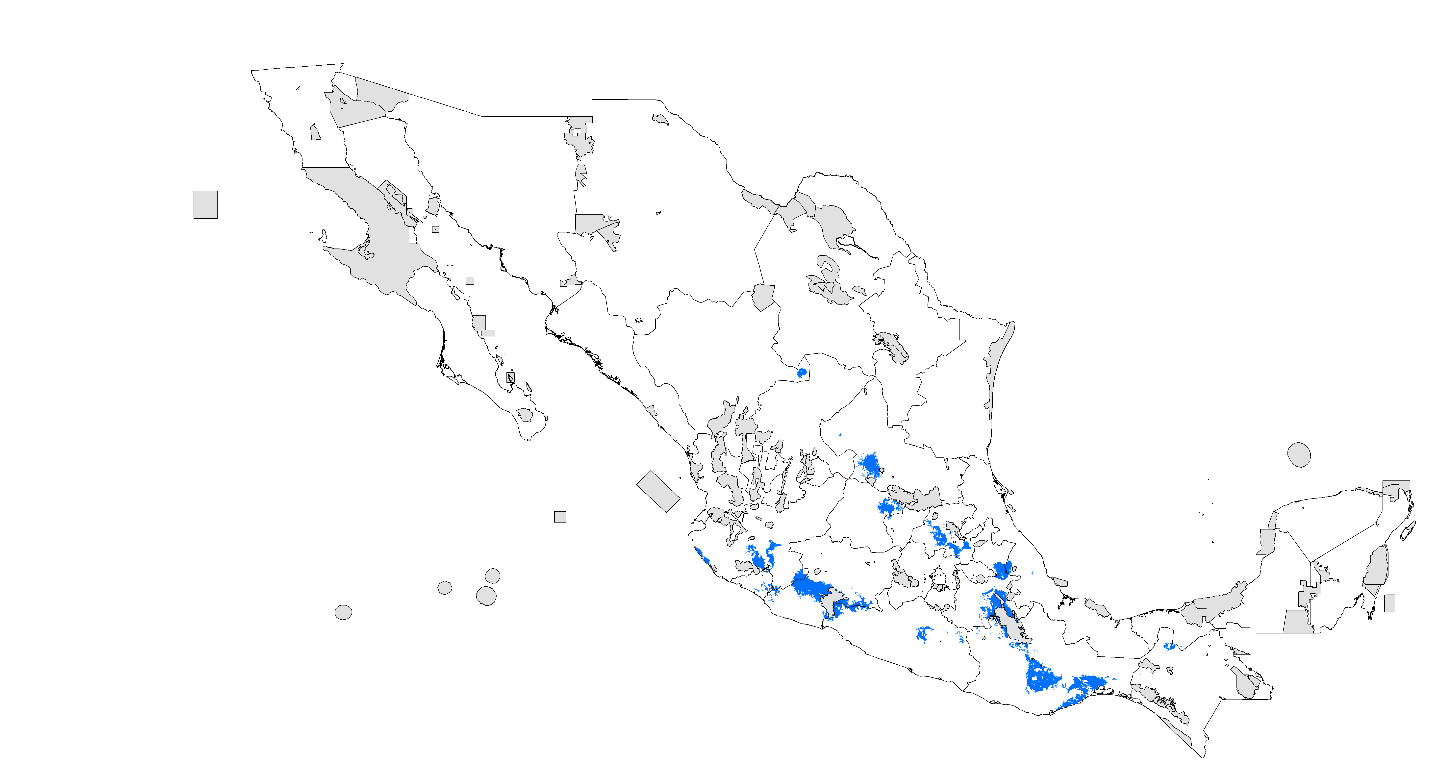


1. PDA 2080 RCP 4.5 W/m2


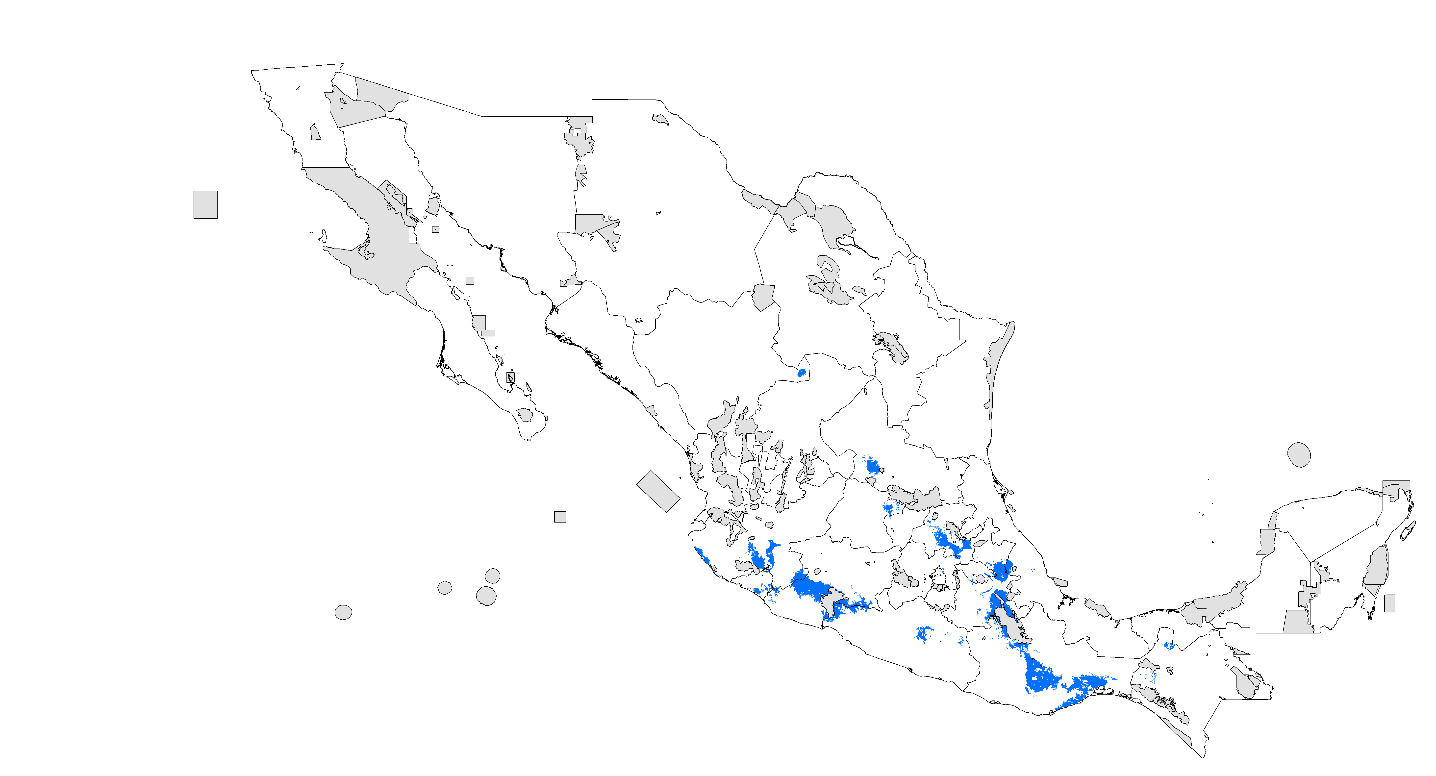


1. PDA 2080 RCP 8.5 W/m2


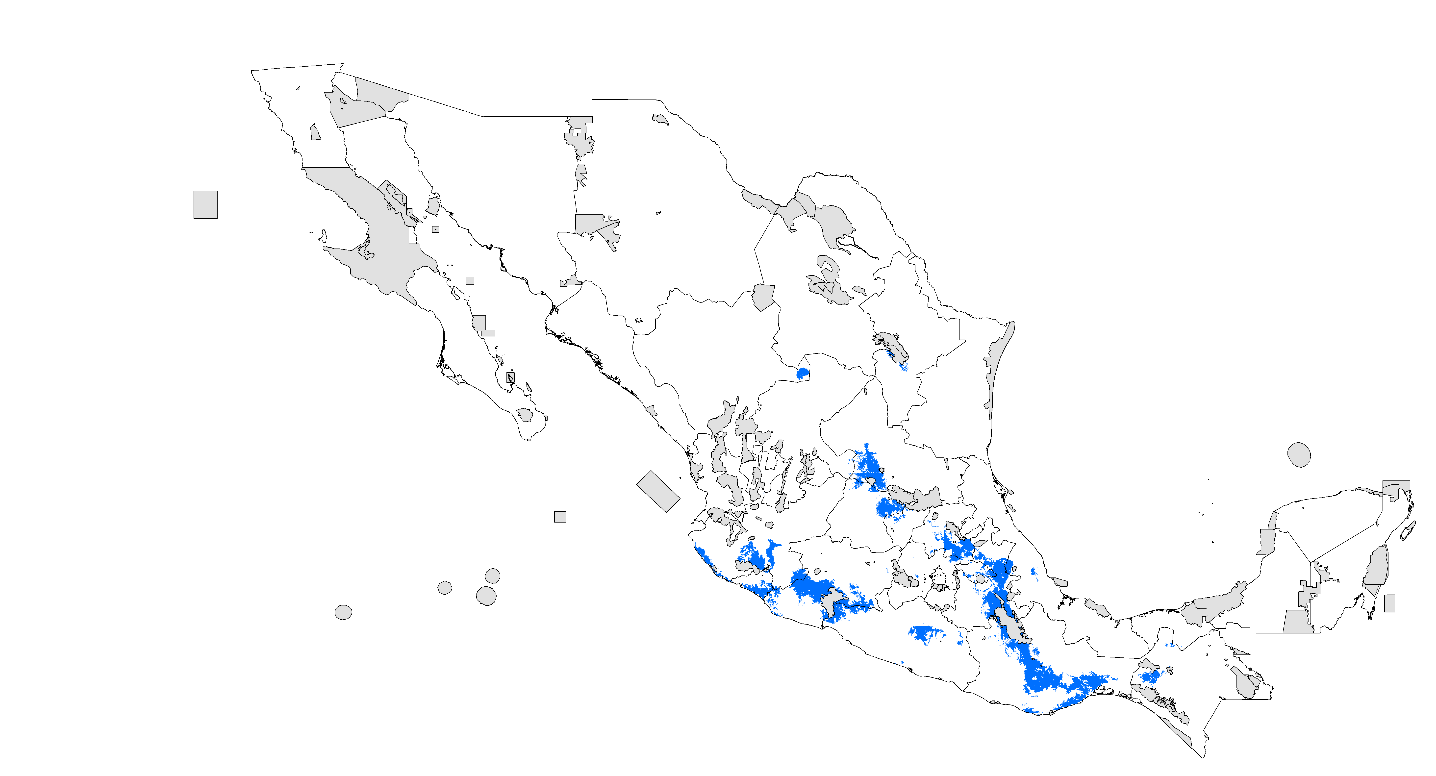


*Centuroides balasenesis*

1. Records


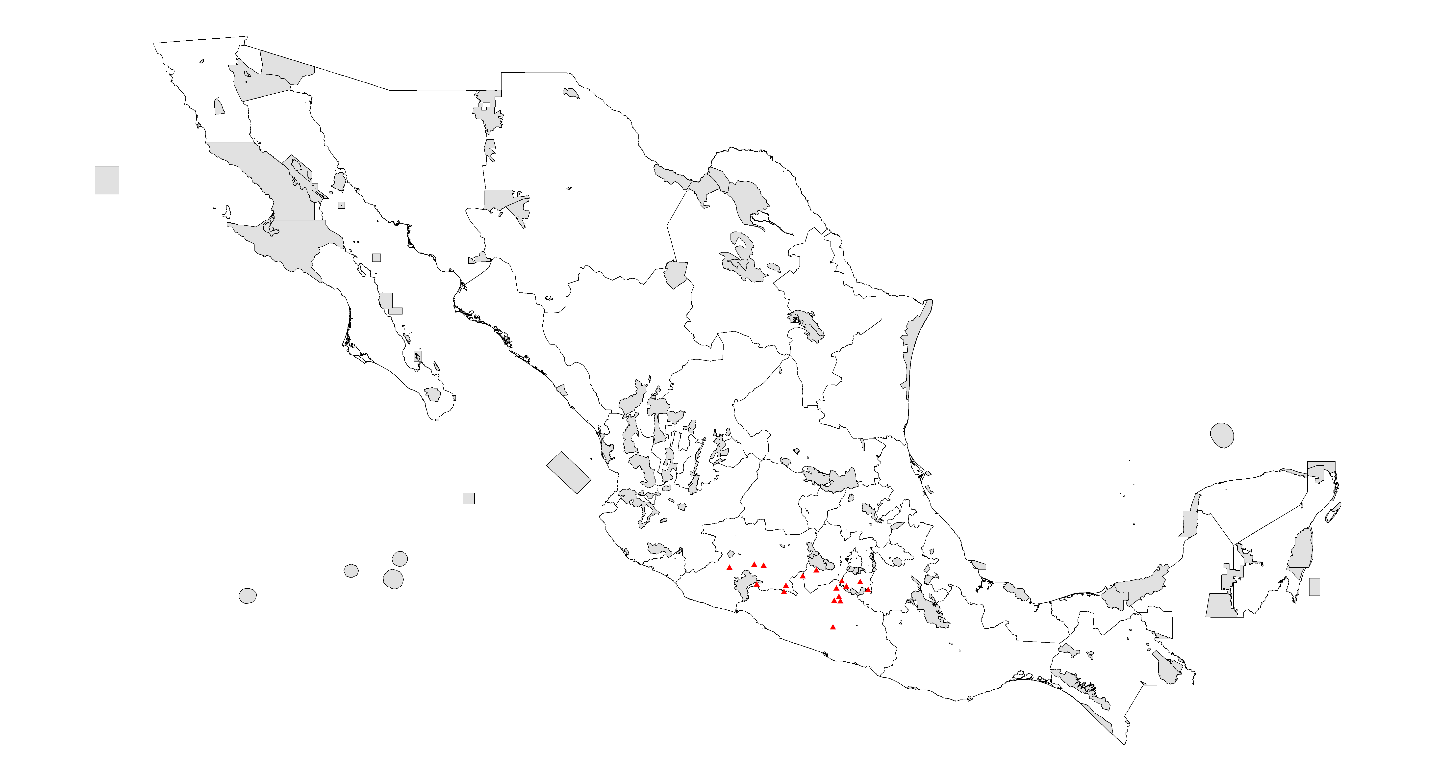


1. PDA under current climatic conditions


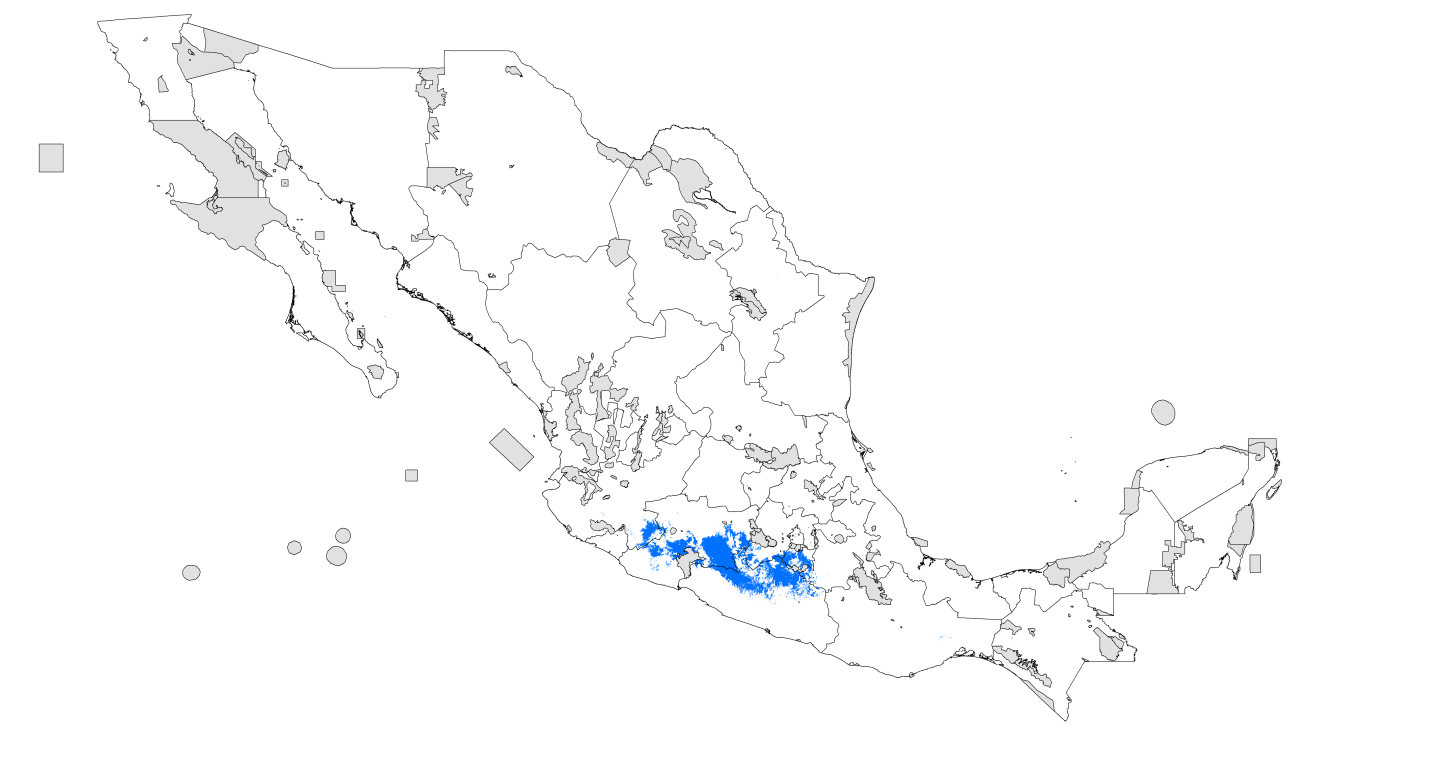


1. PDA 2020 RCP 4.5 W/m2


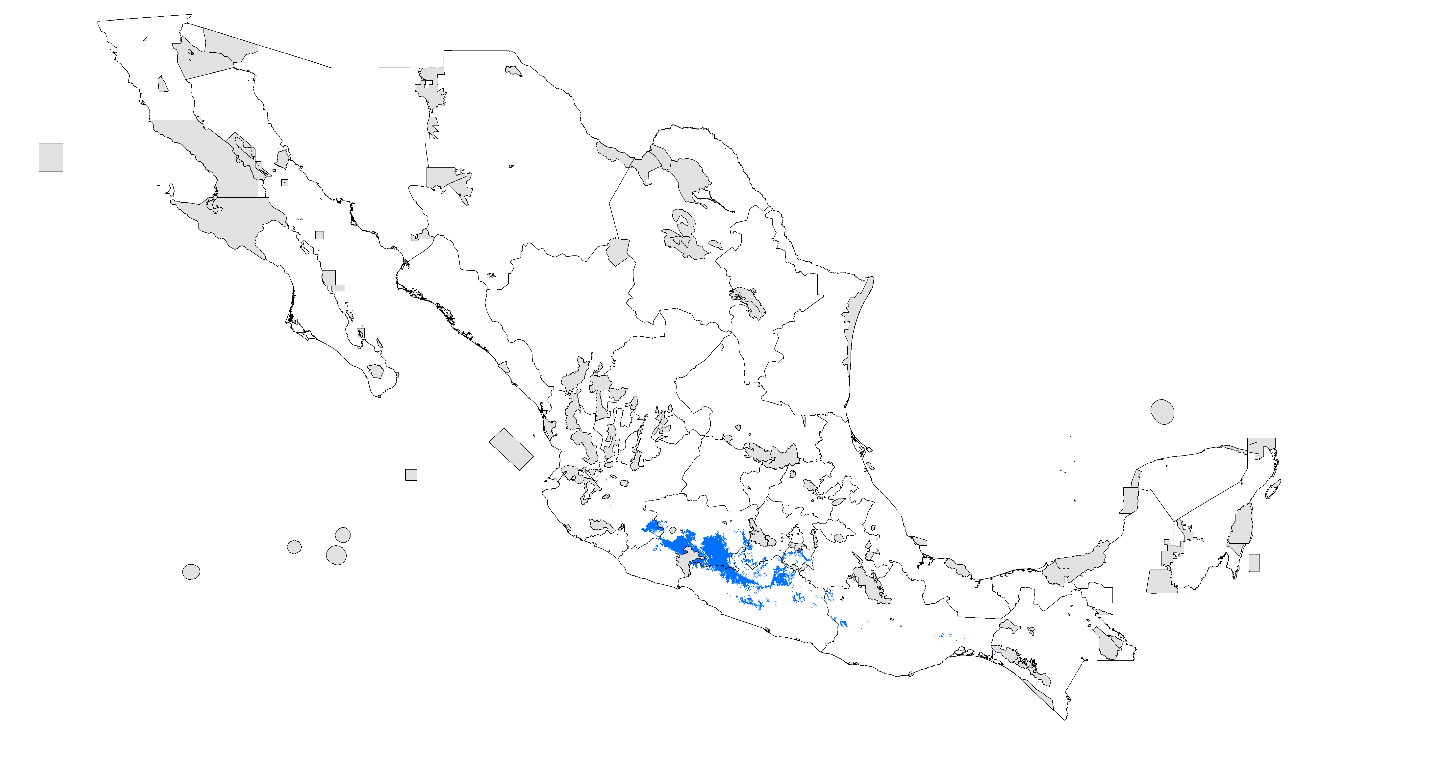


1. PDA 2020 RCP 8.5 W/m2


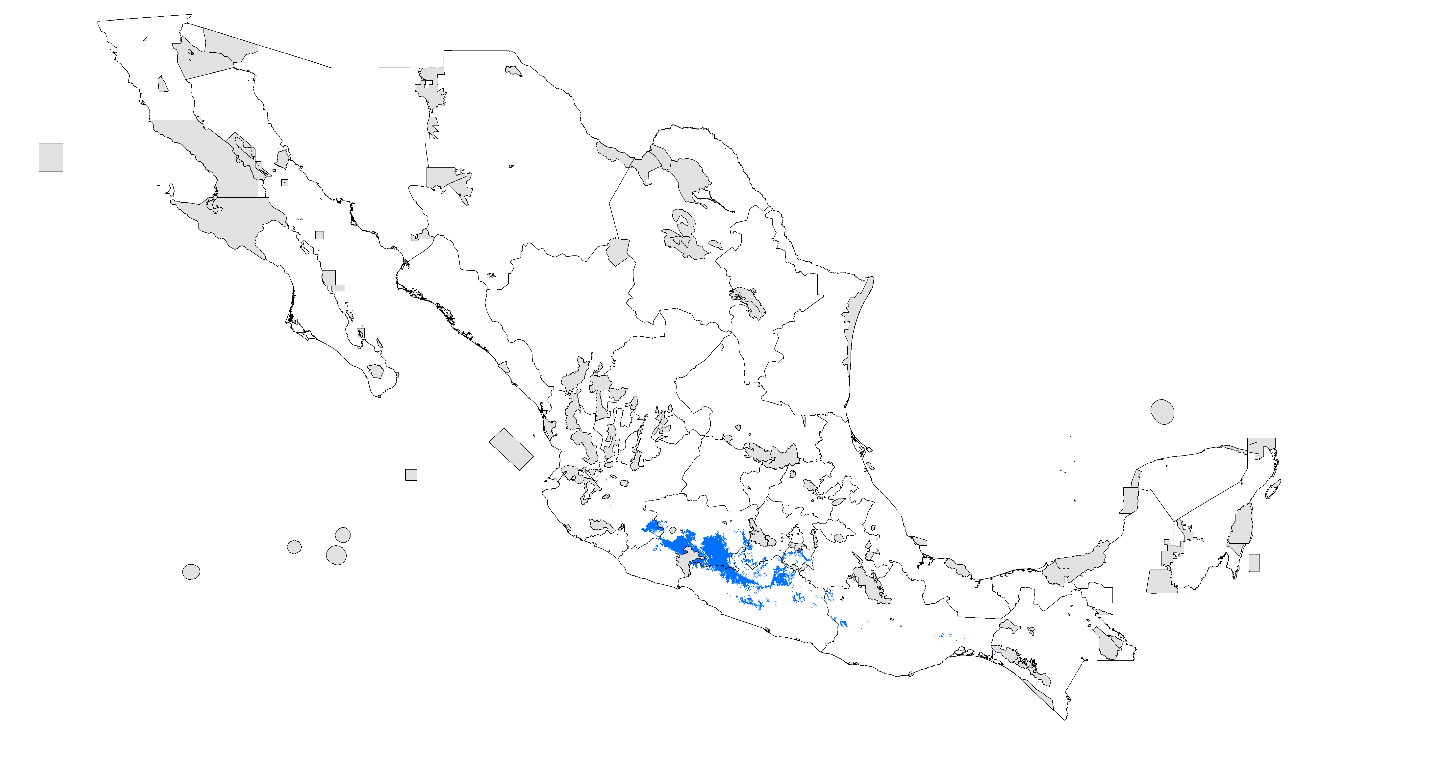


1. PDA 2080 RCP 4.5 W/m2


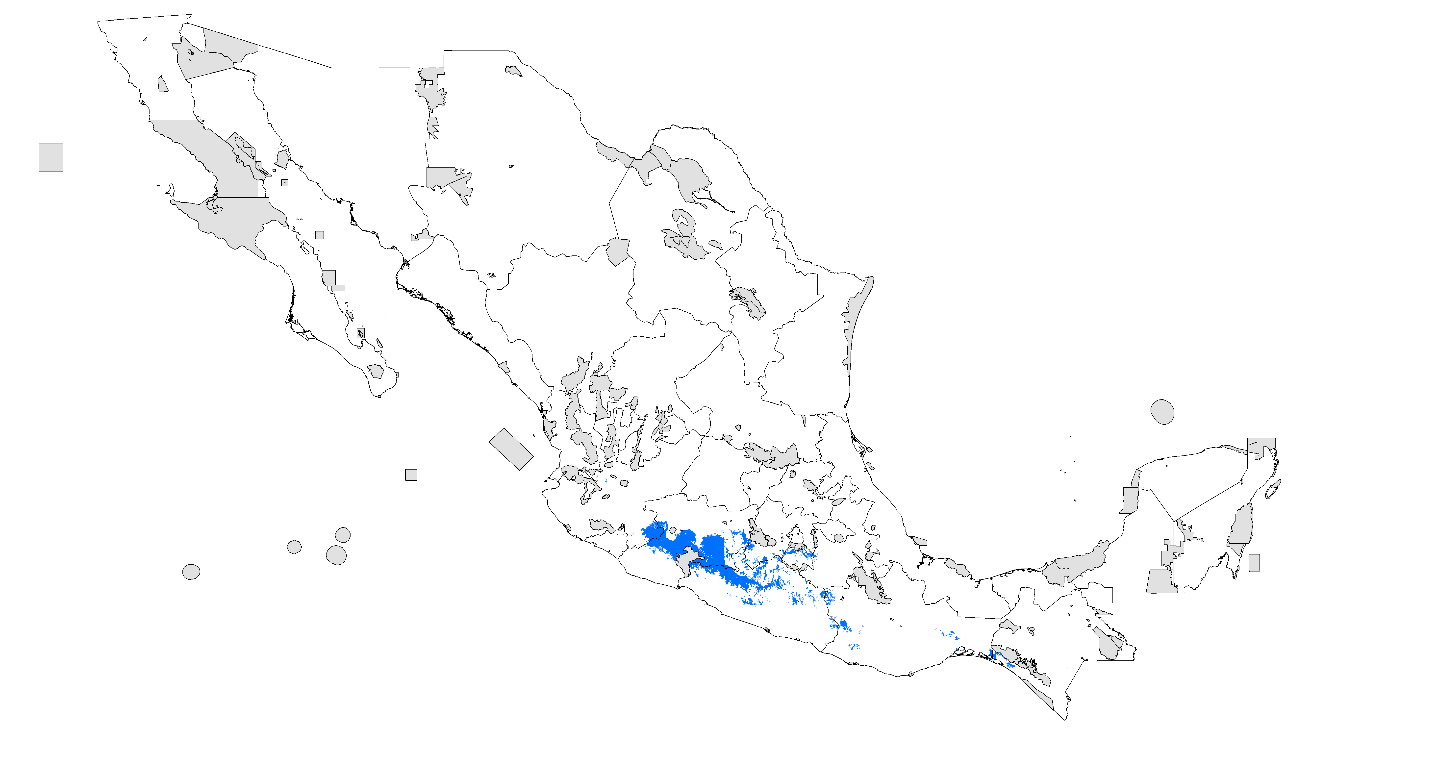


1. PDA 2080 RCP 8.5 W/m2


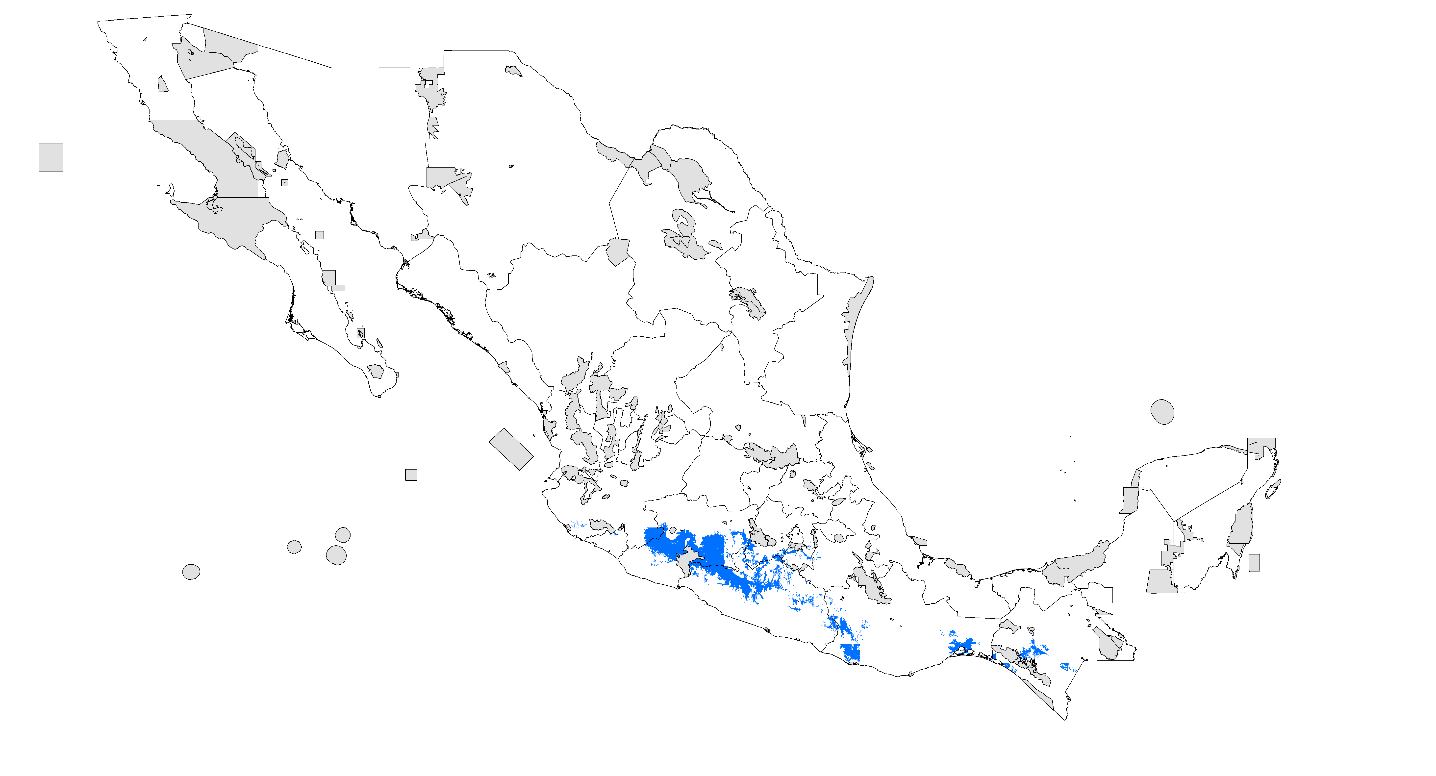


*Centuroides gracilis*

1. Records


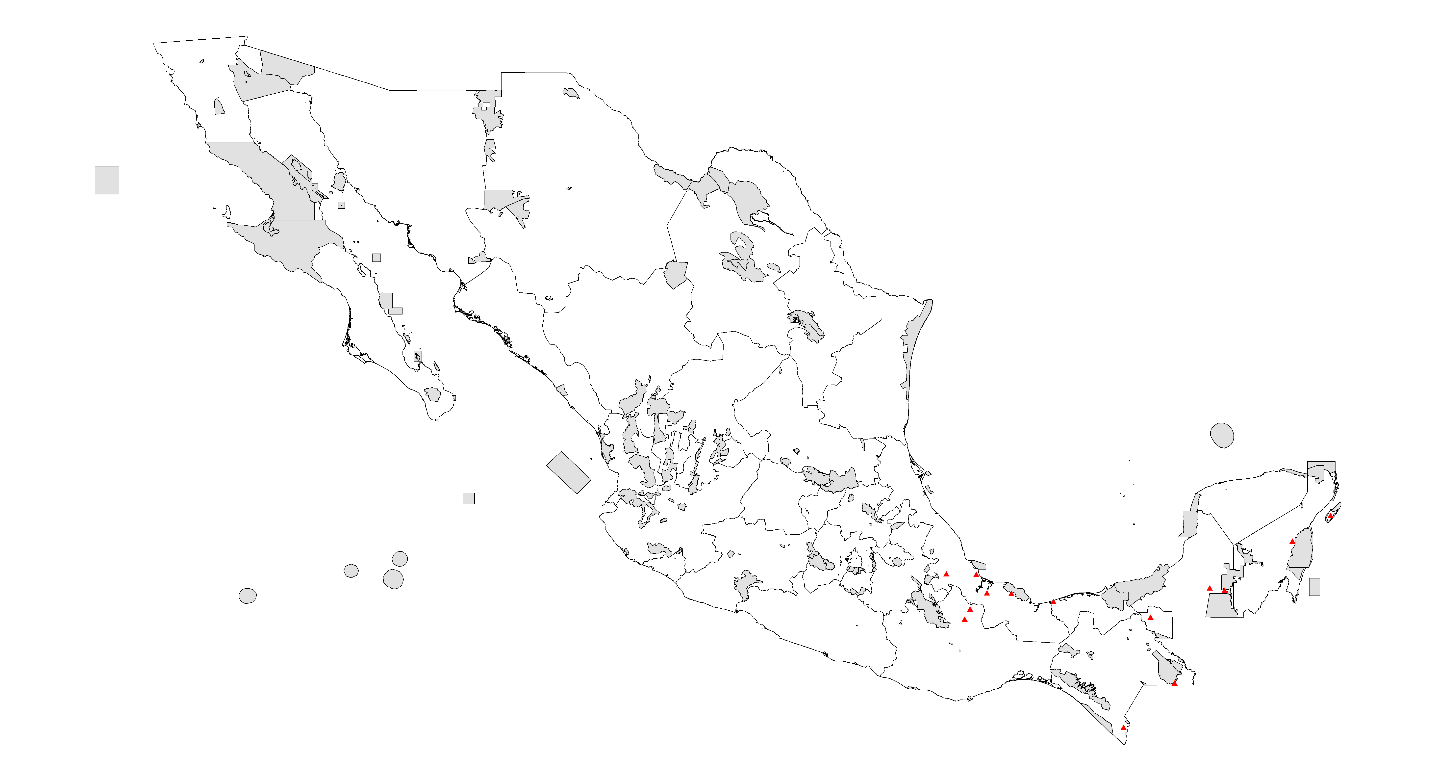


1. PDA under current climatic conditions


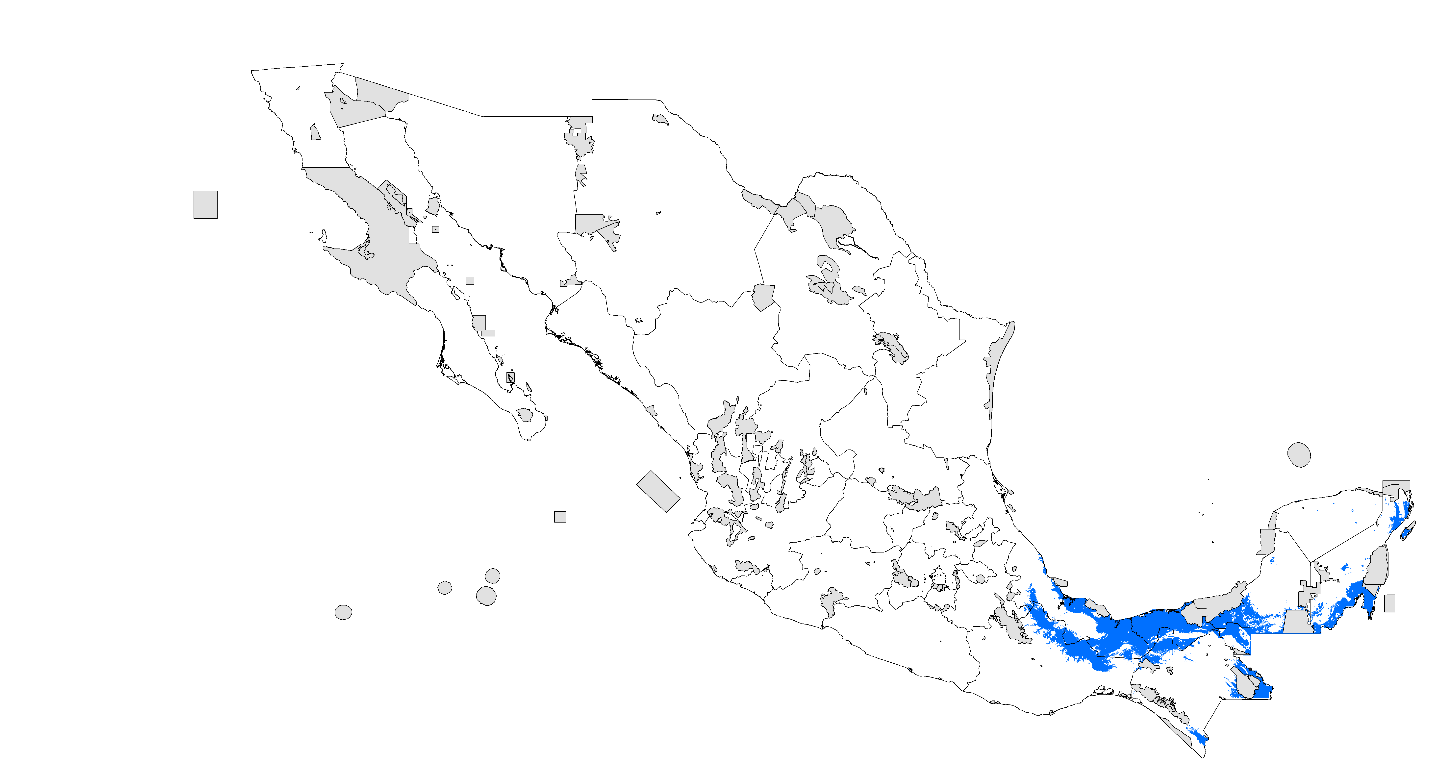


1. PDA 2020 RCP 4.5 W/m2


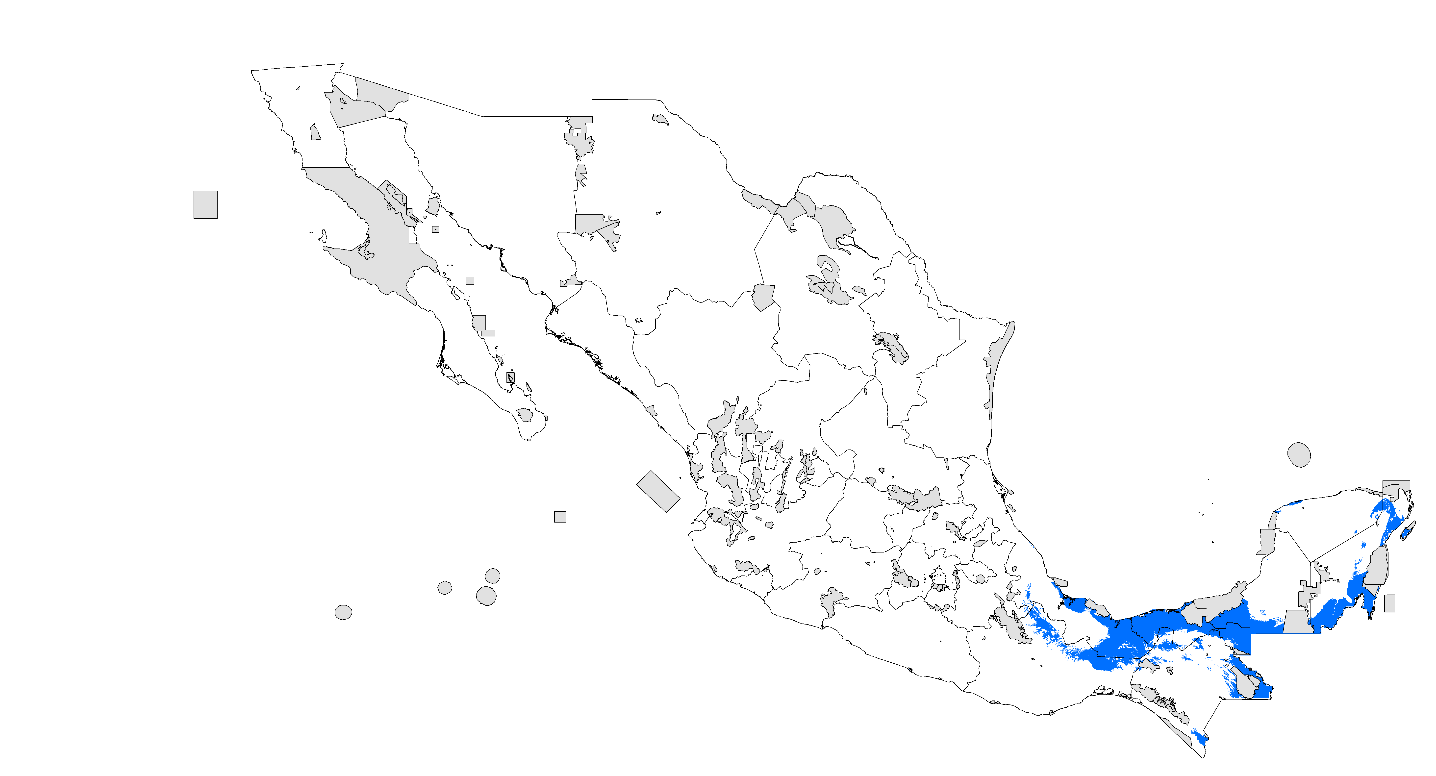


1. PDA 2020 RCP 8.5 W/m2


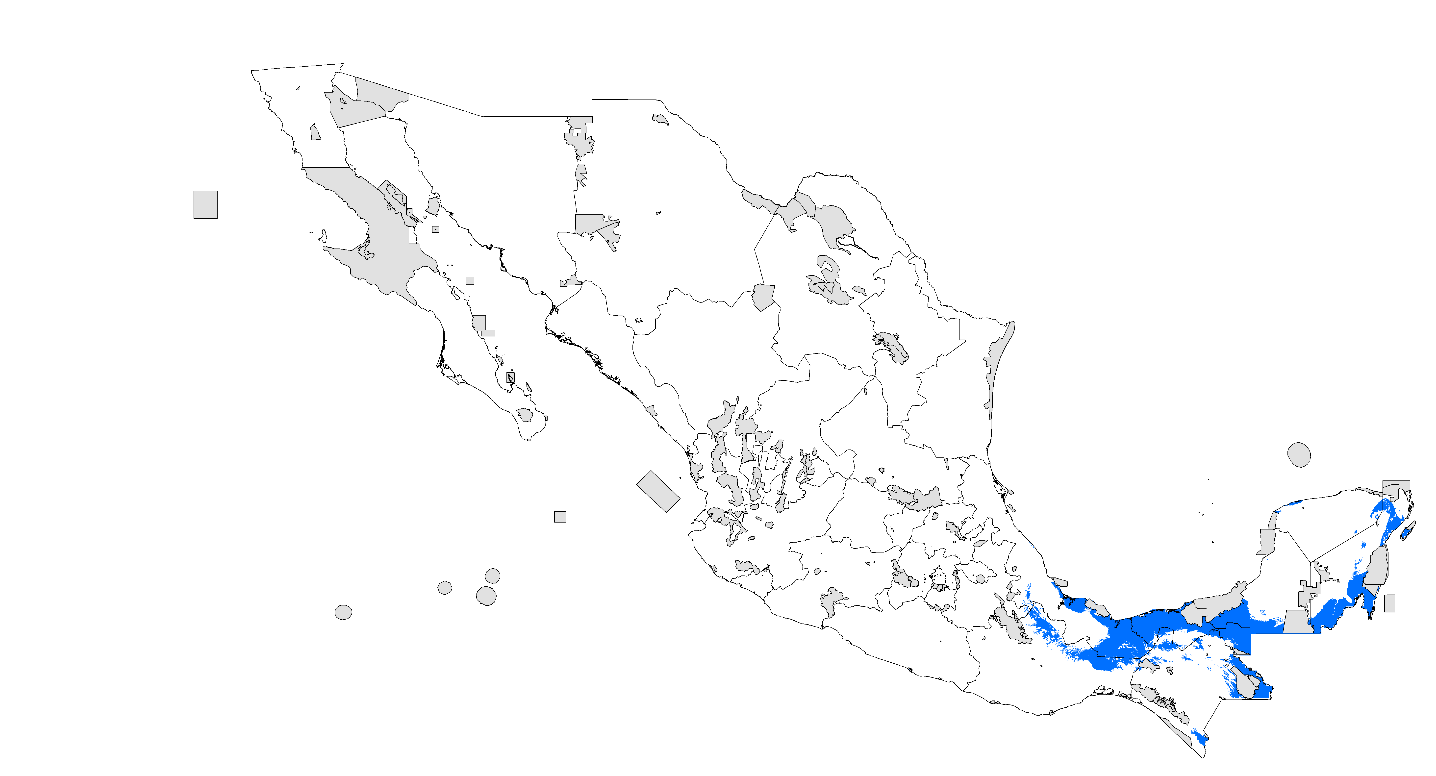


1. PDA 2080 RCP 4.5 W/m2


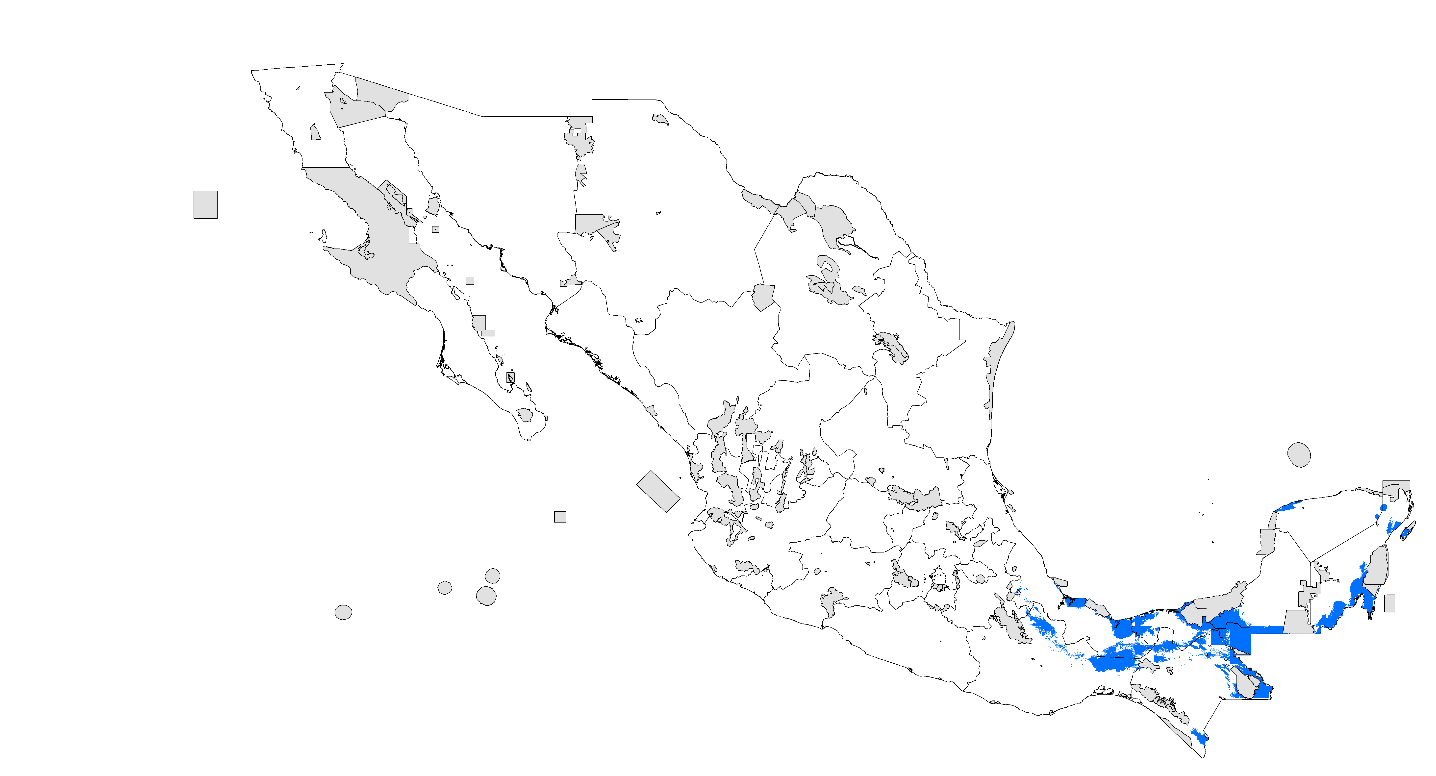


1. PDA 2080 RCP 8.5 W/m2


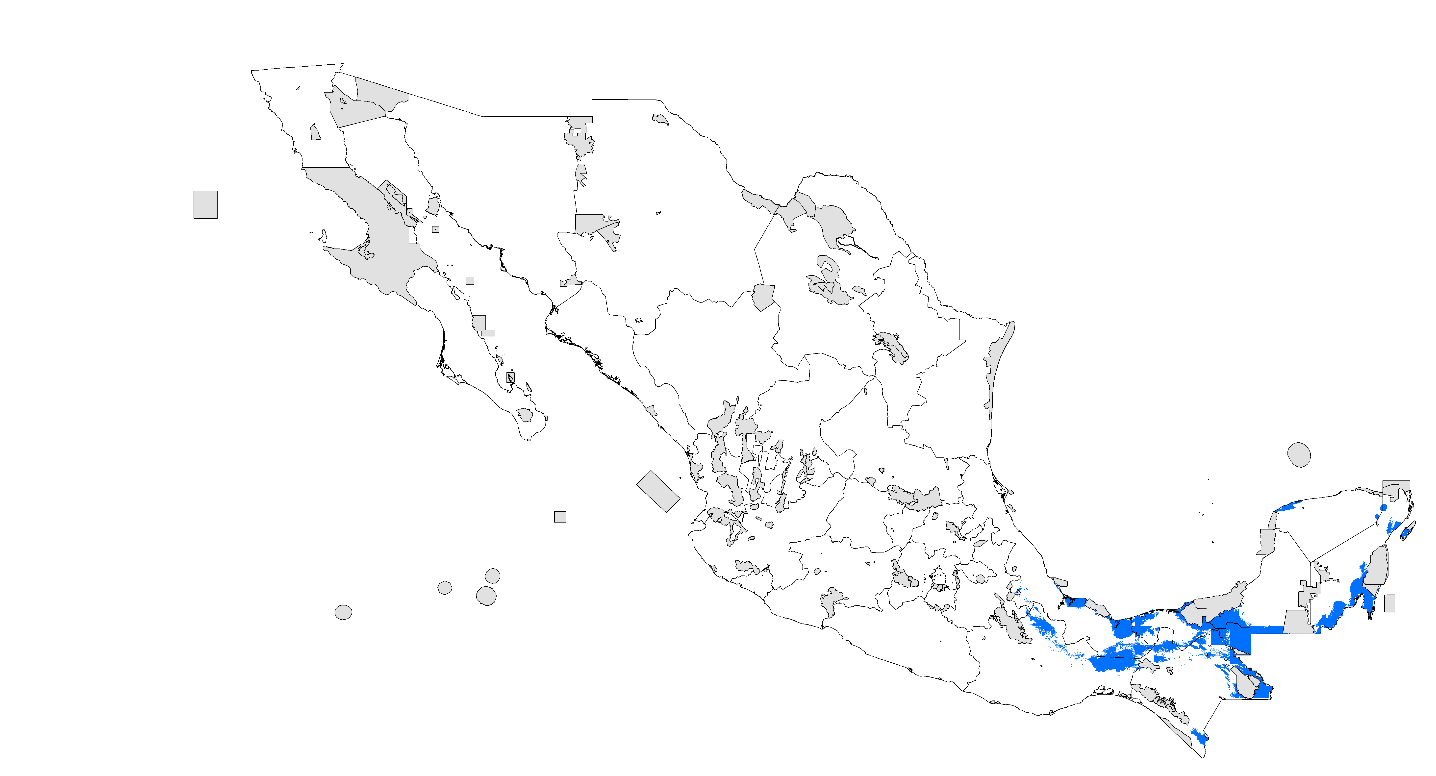


*Centuroides limpidus*

1. Records


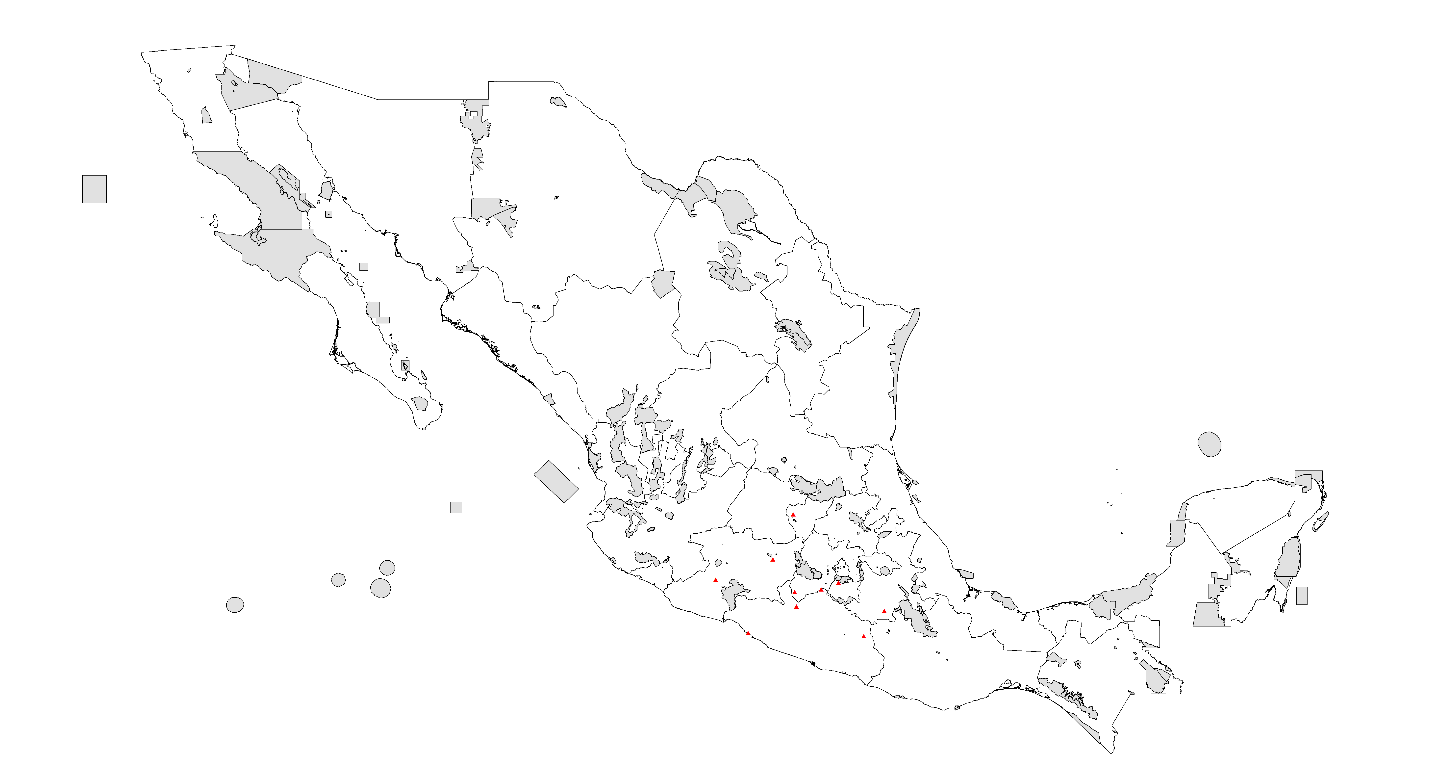


1. PDA under current climatic conditions


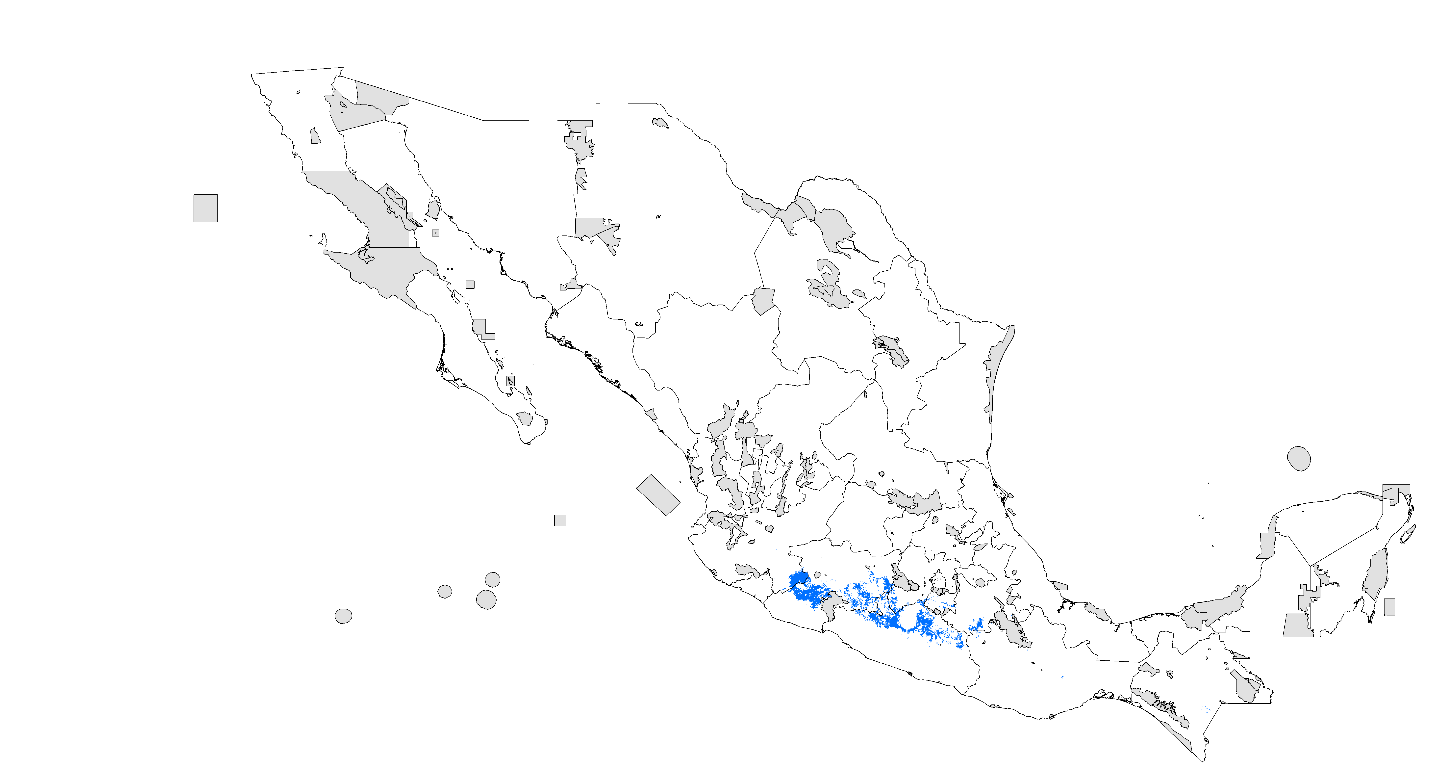


1. PDA 2020 RCP 4.5 W/m2


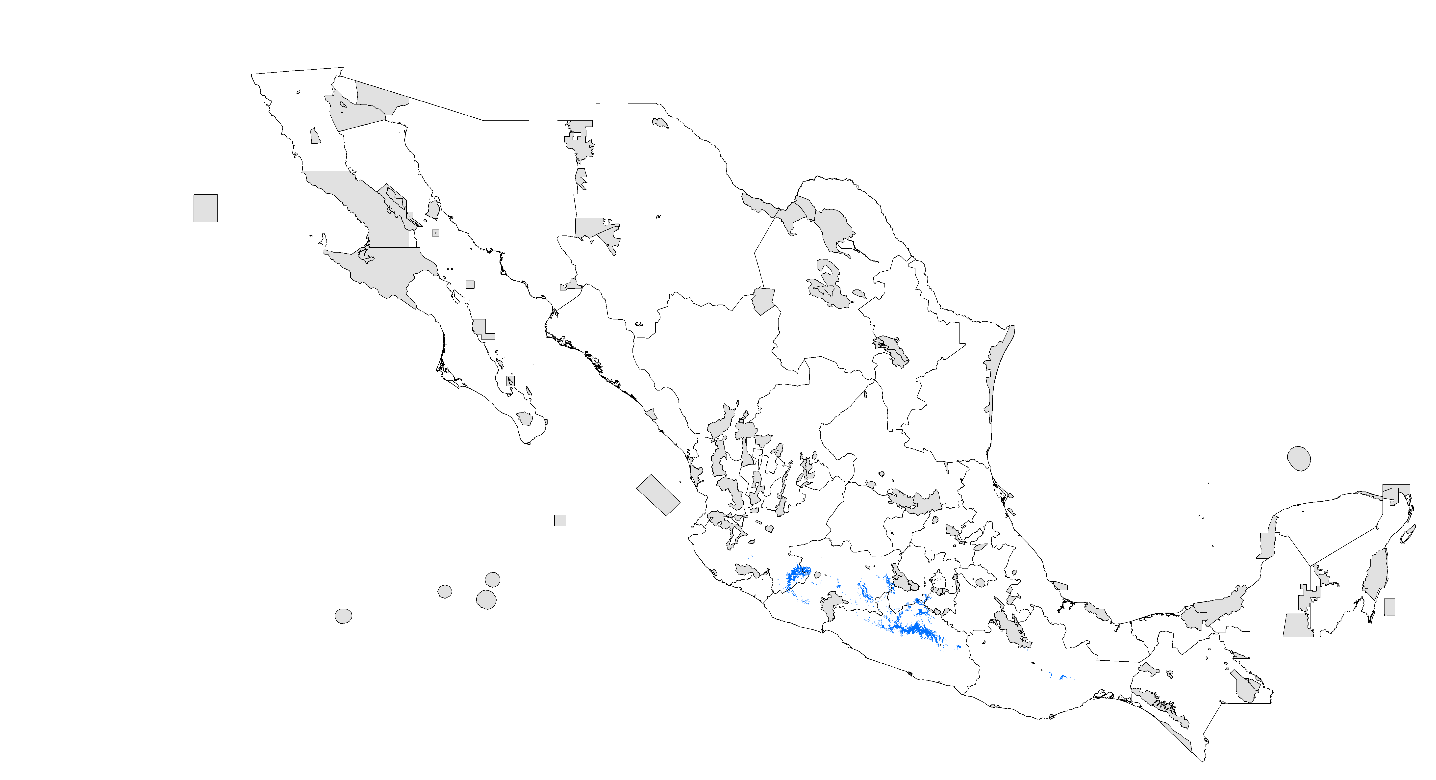


1. PDA 2020 RCP 8.5 W/m2


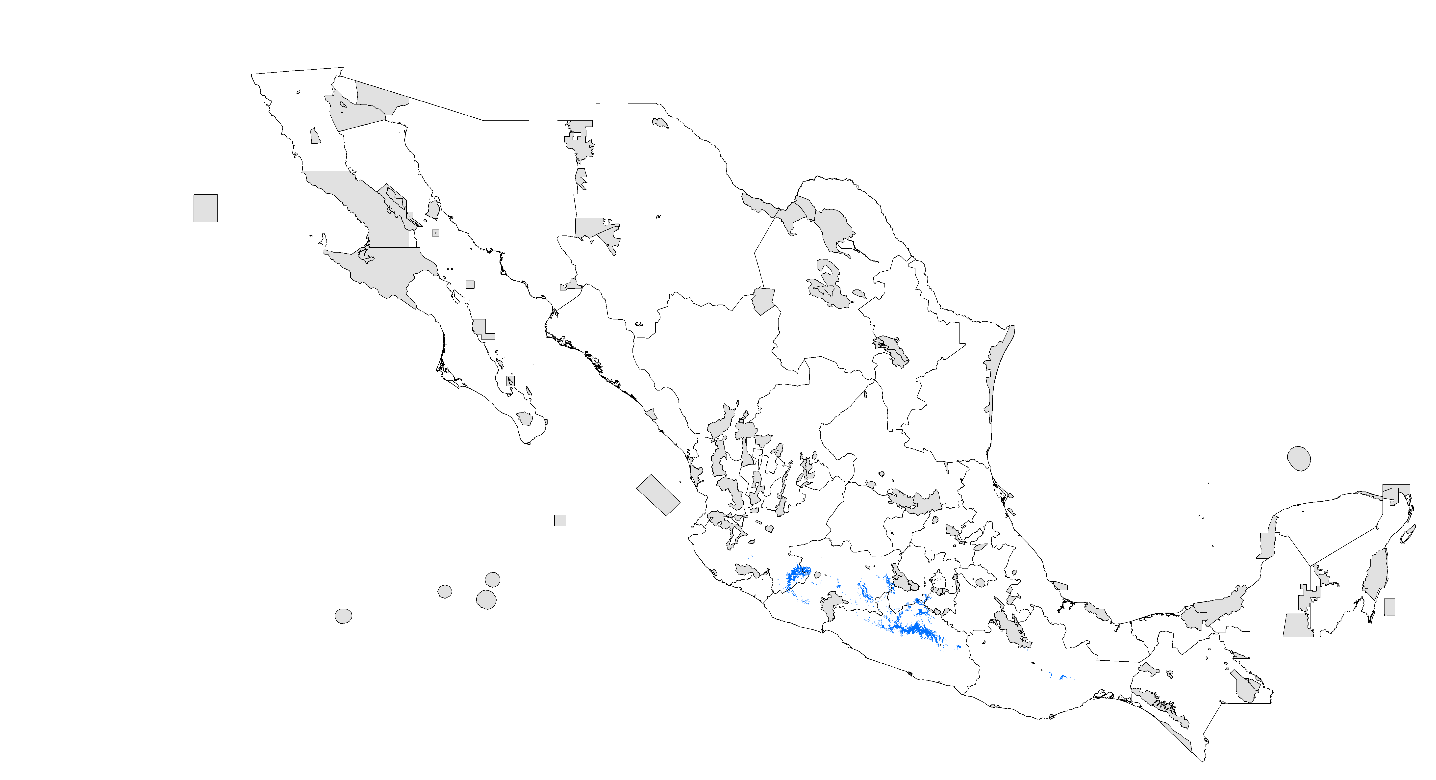


1. PDA 2080 RCP 4.5 W/m2


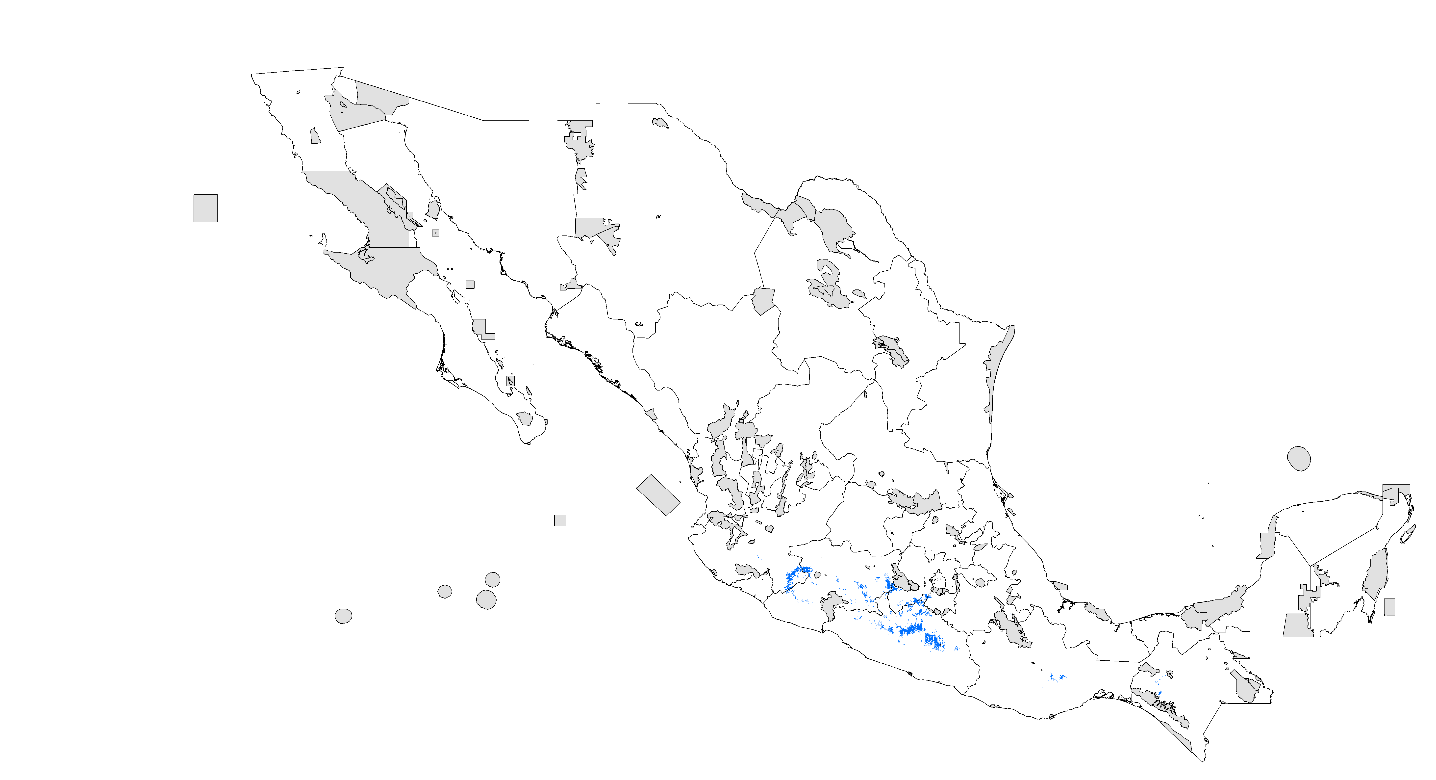


1. PDA 2080 RCP 8.5 W/m2

*
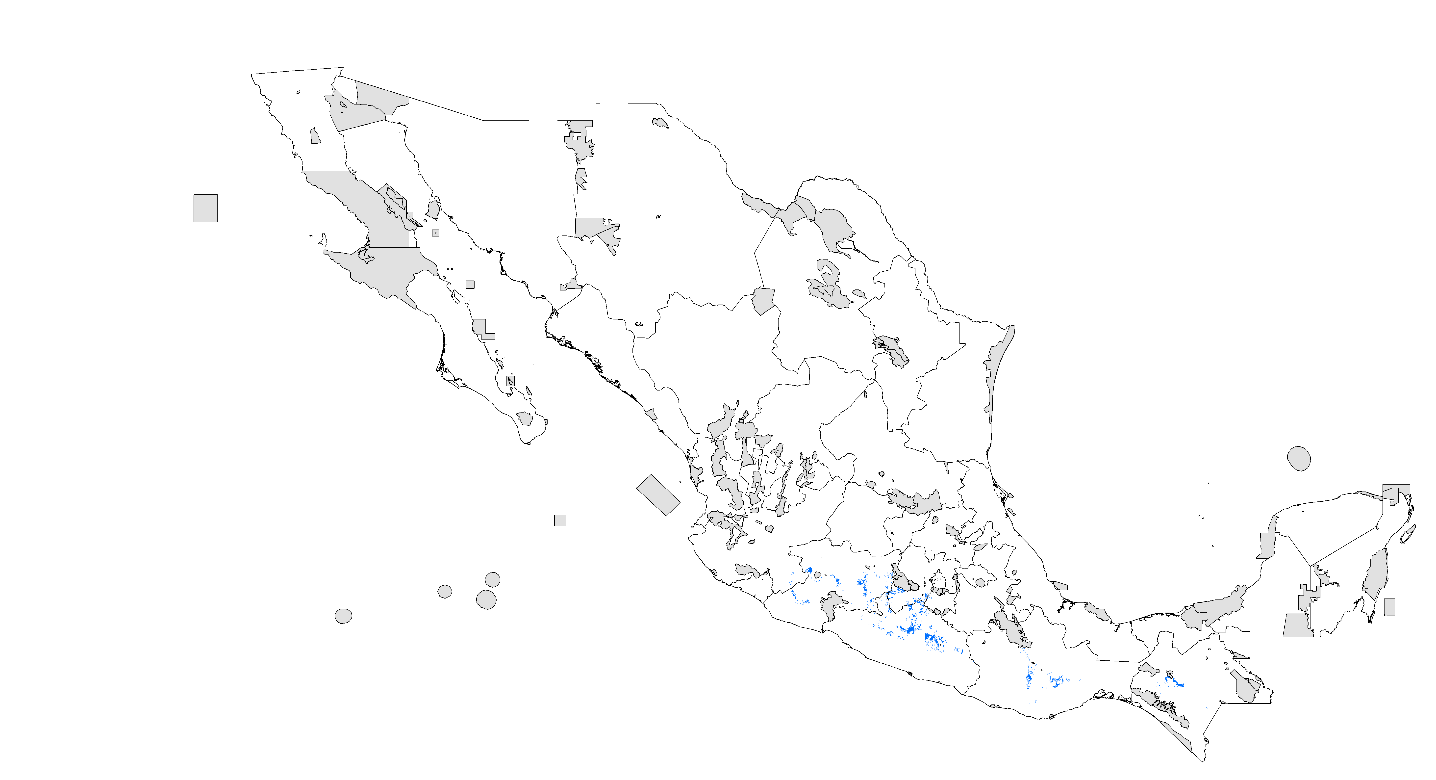
*

*Centuroides ornatus*

1. Records


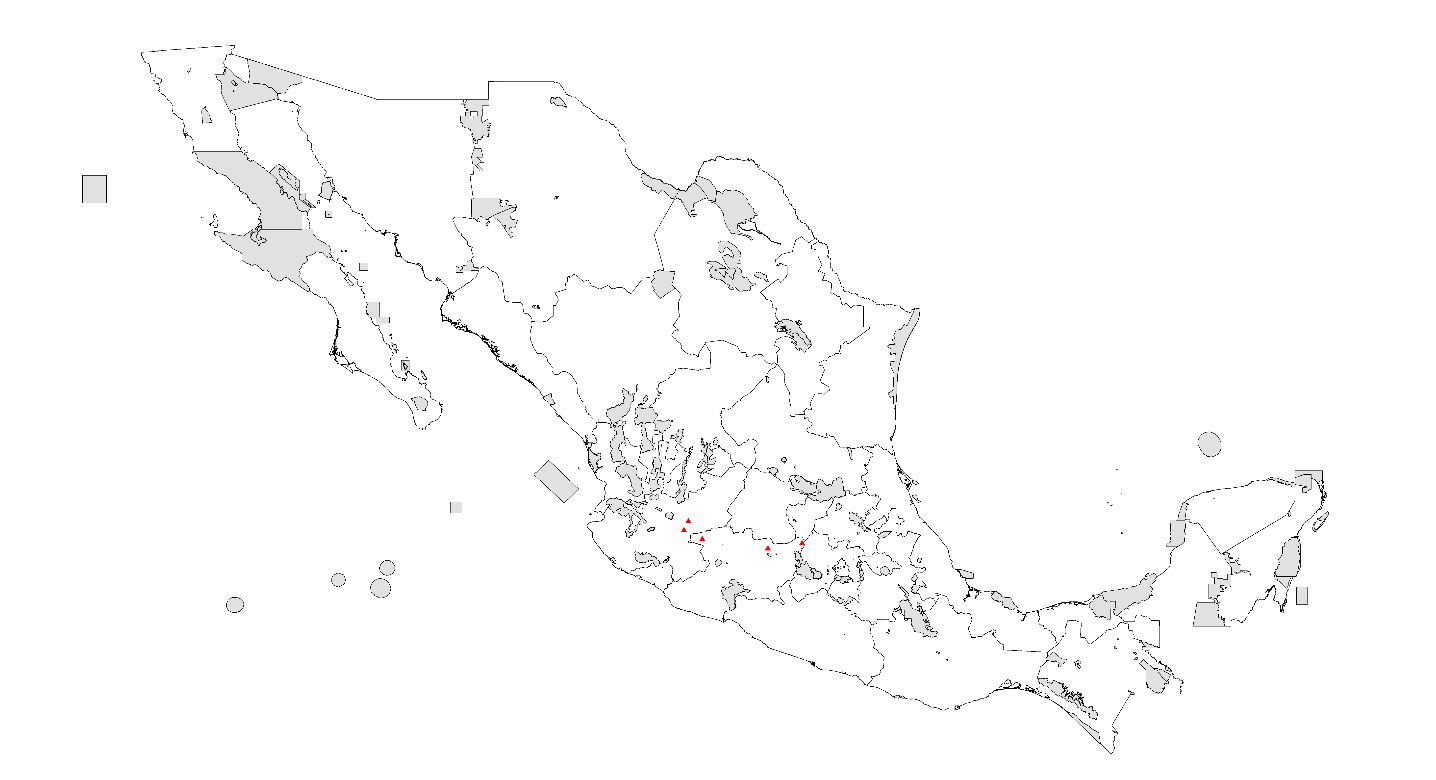


1. PDA under current climatic conditions


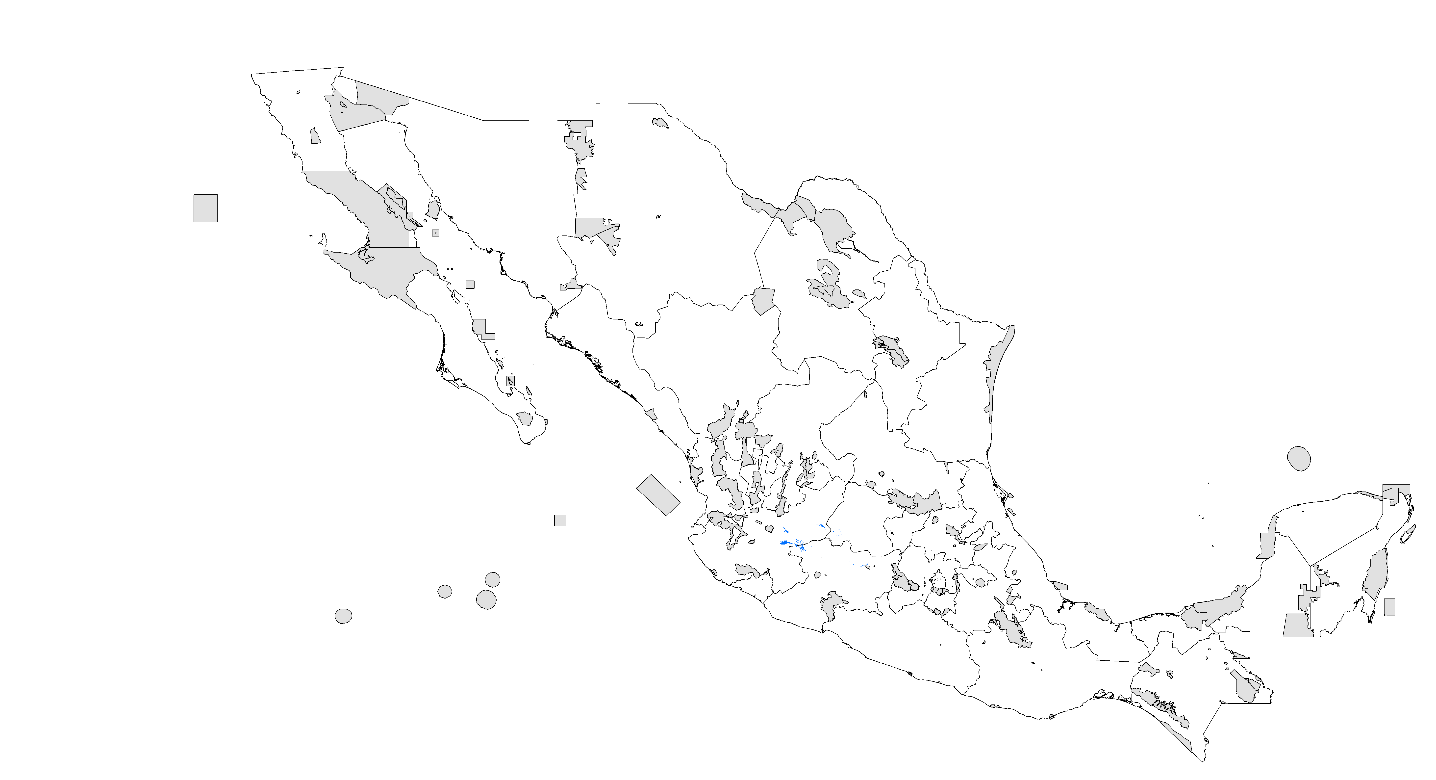


1. PDA 2020 RCP 4.5 W/m2


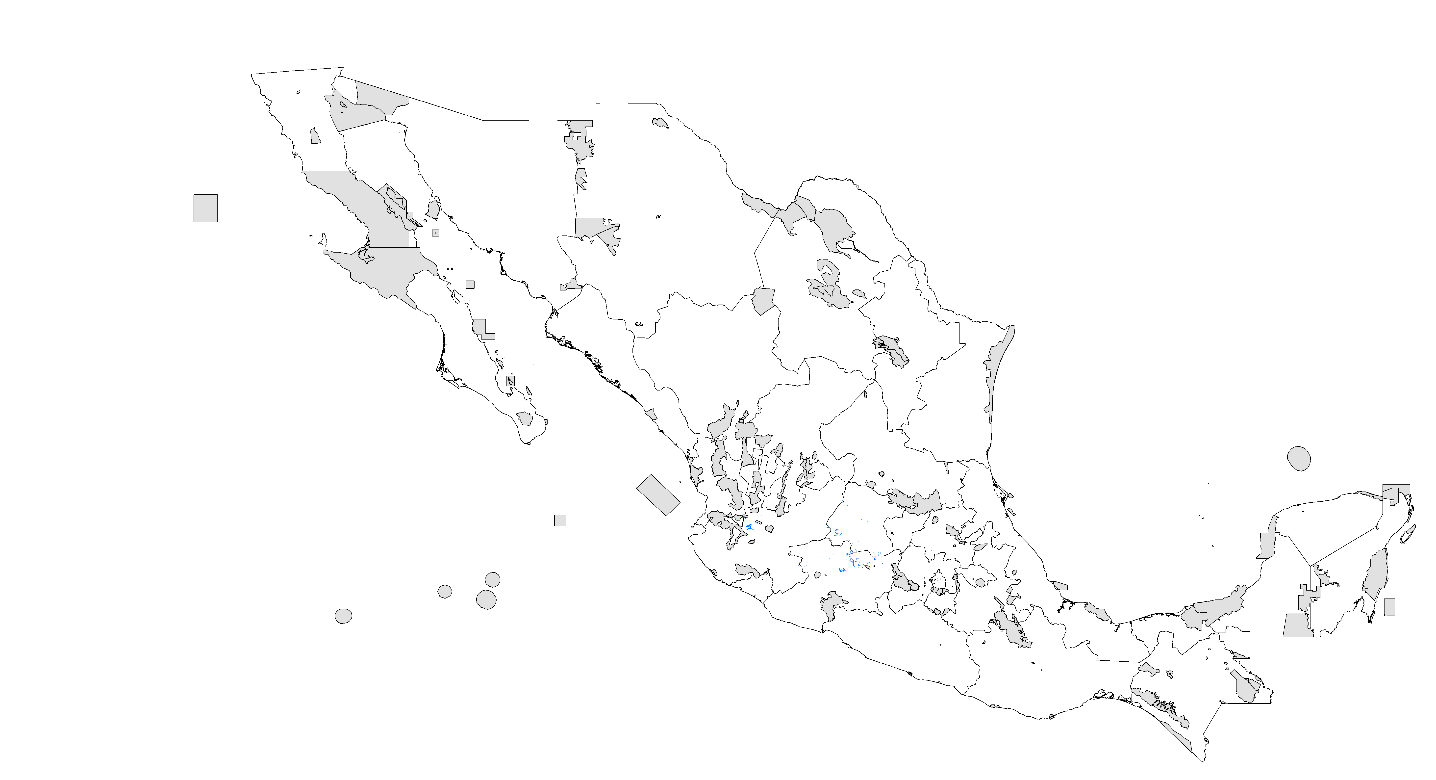


1. PDA 2020 RCP 8.5 W/m2


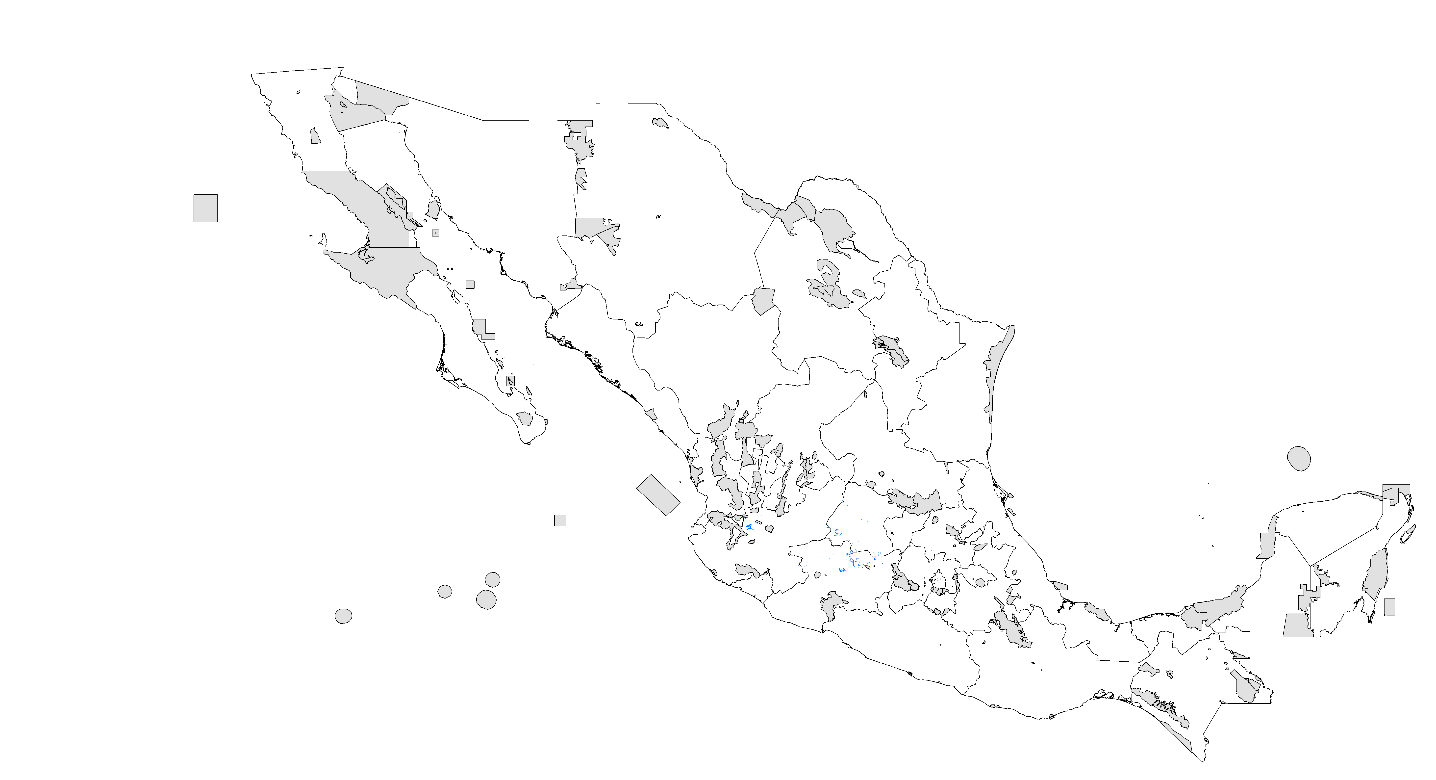


1. PDA 2080 RCP 4.5 W/m2


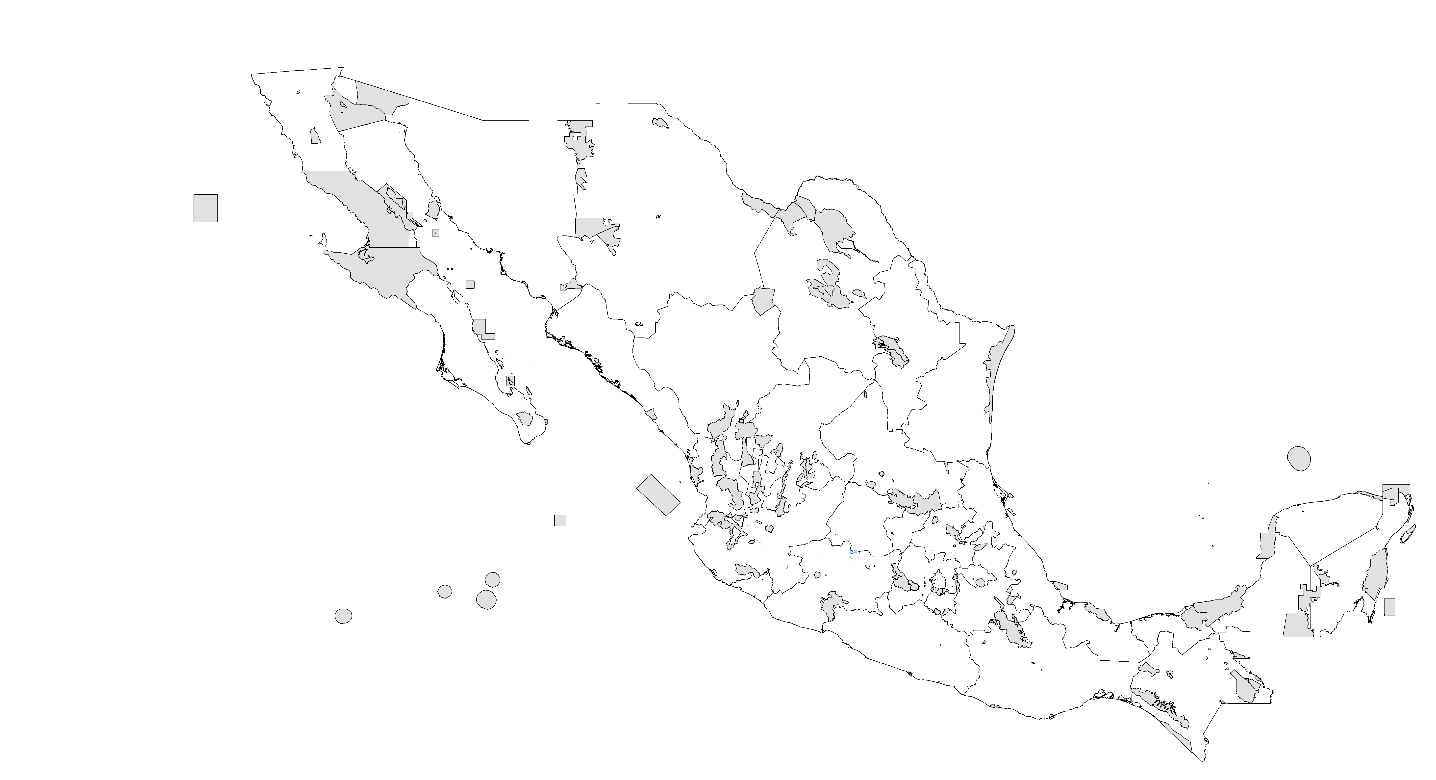


1. PDA 2080 RCP 8.5 W/m2


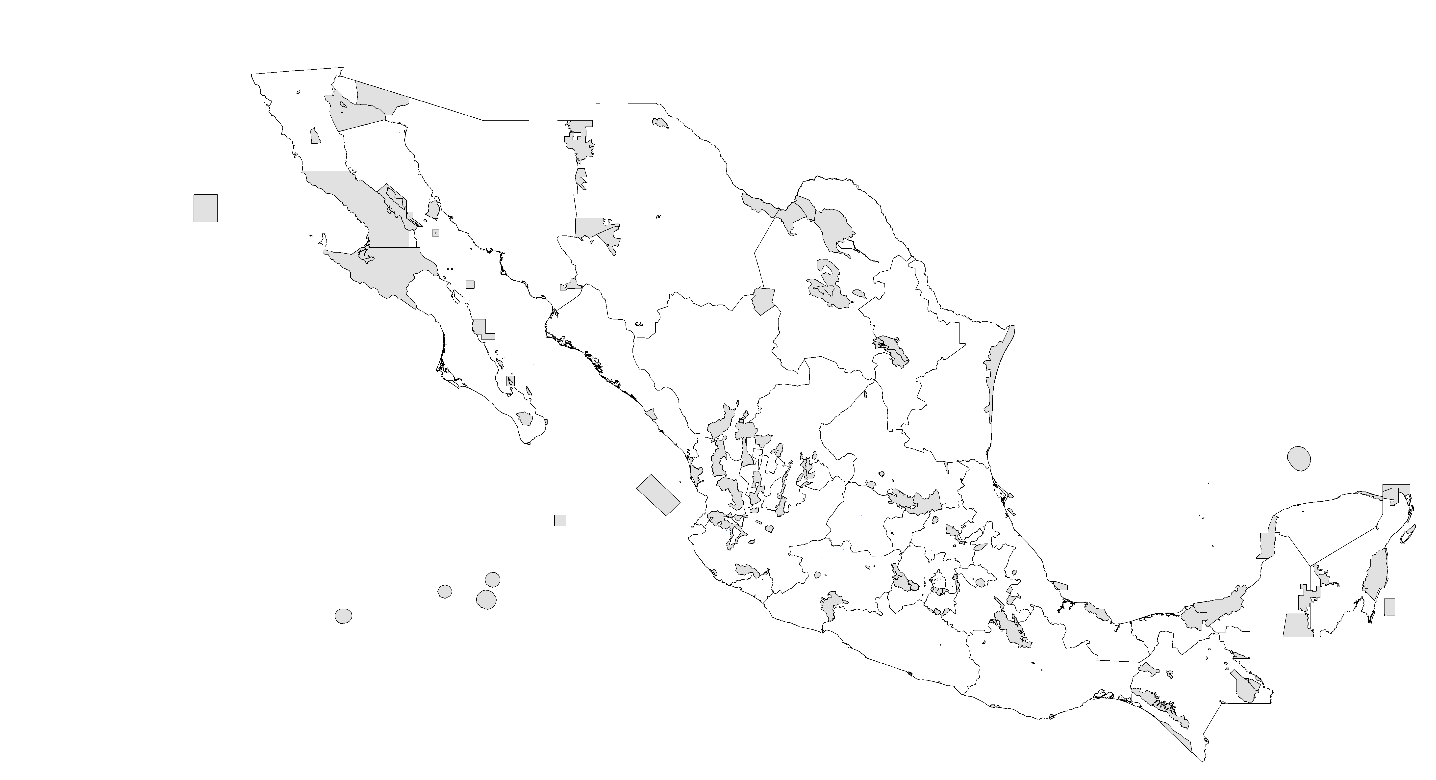


*Chihuahuanus bilineatus*

1. Records


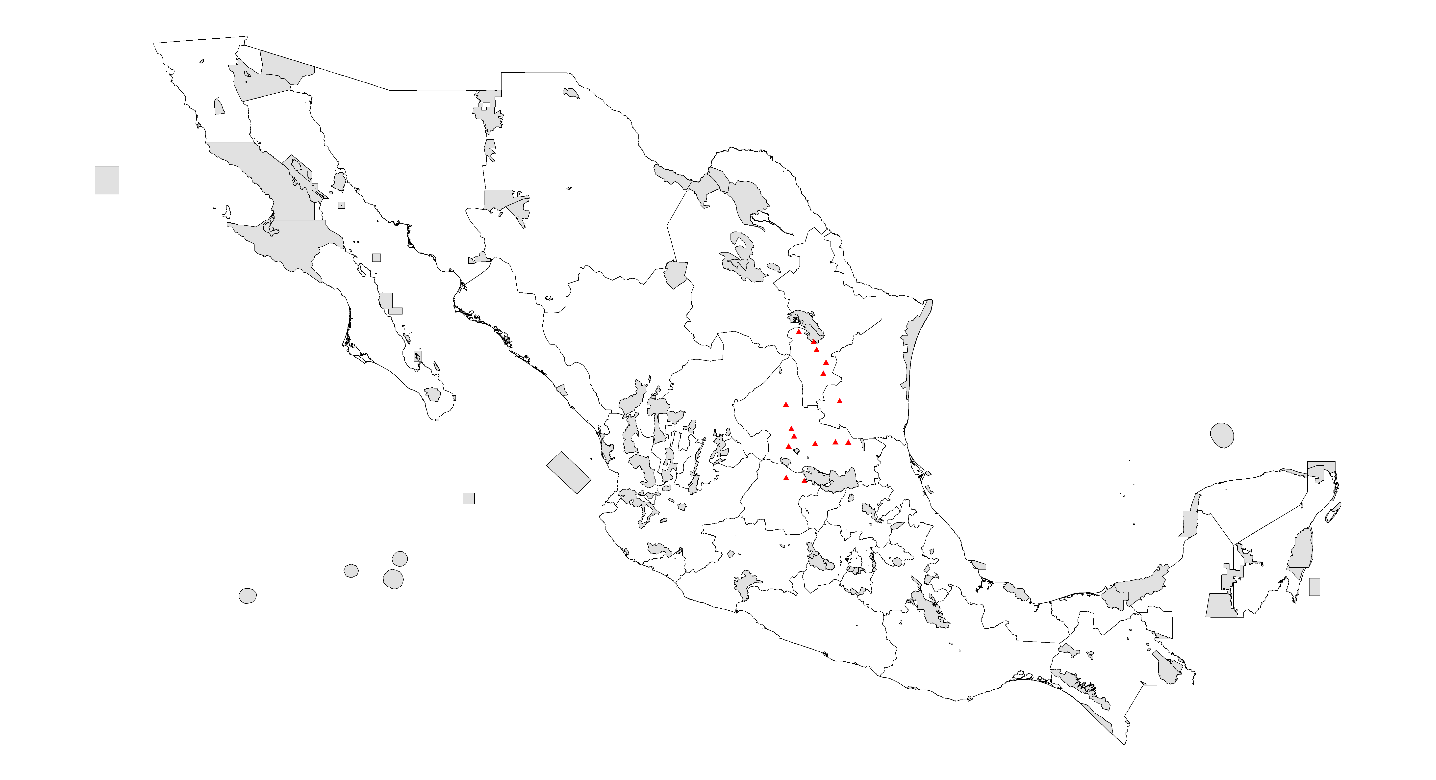


1. PDA under current climatic conditions


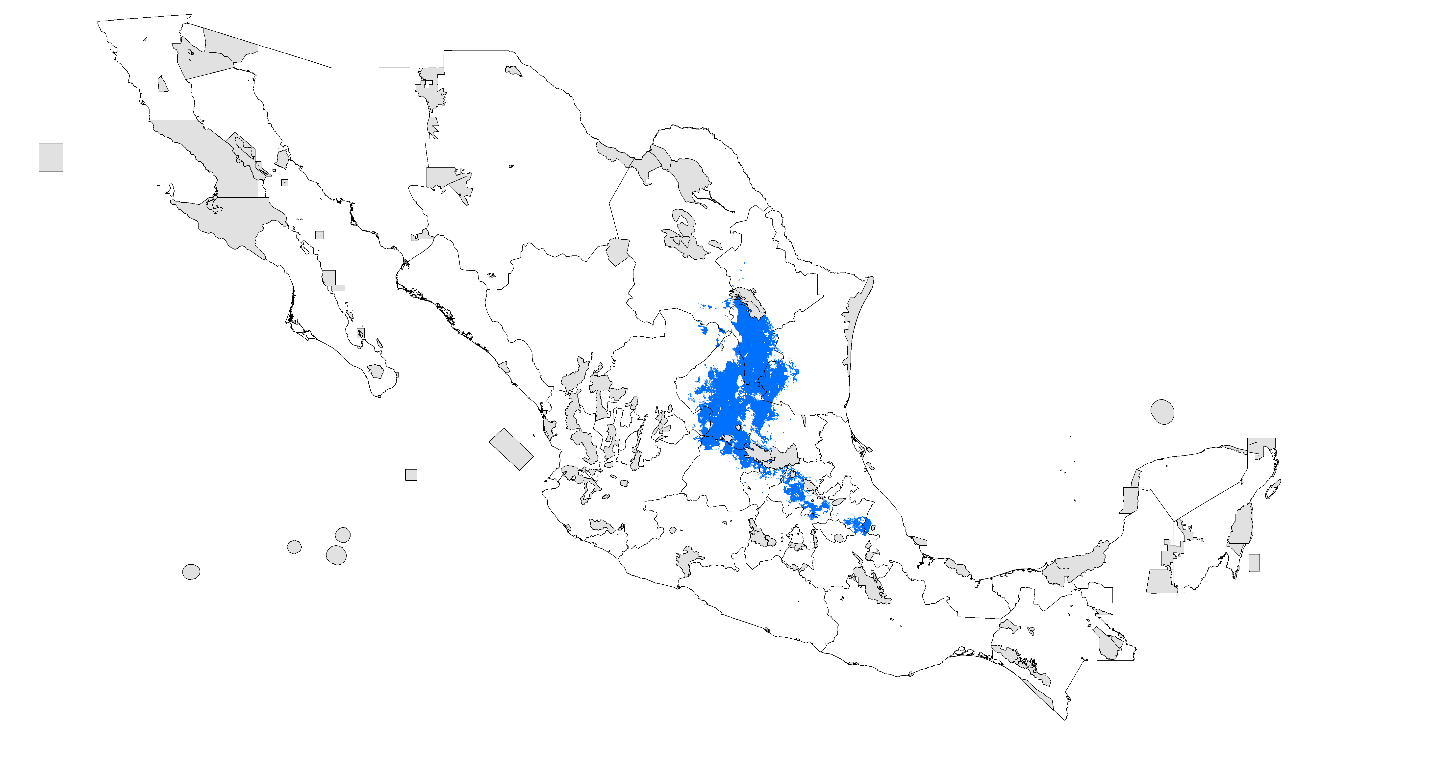


1. PDA 2020 RCP 4.5 W/m2


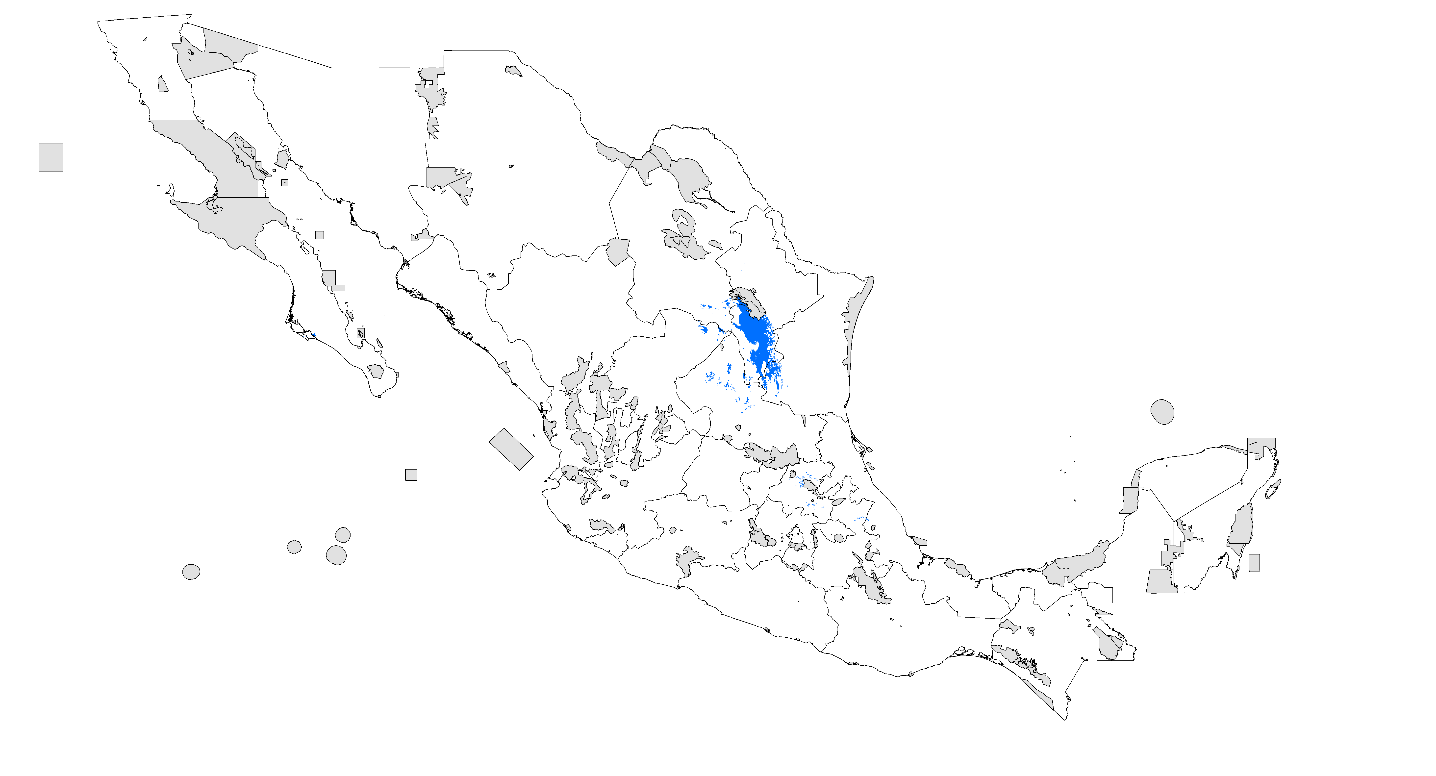


1. PDA 2020 RCP 8.5 W/m2


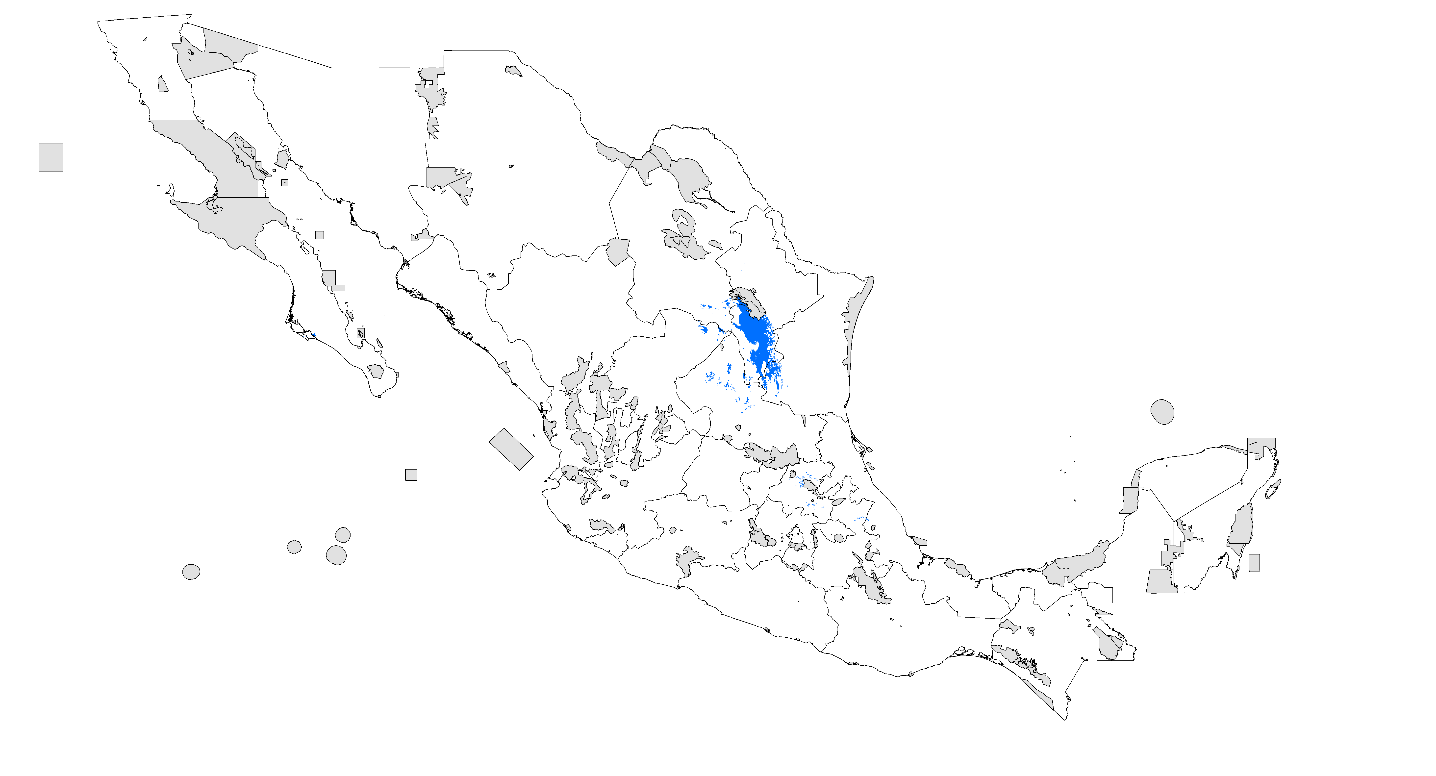


1. PDA 2080 RCP 4.5 W/m2


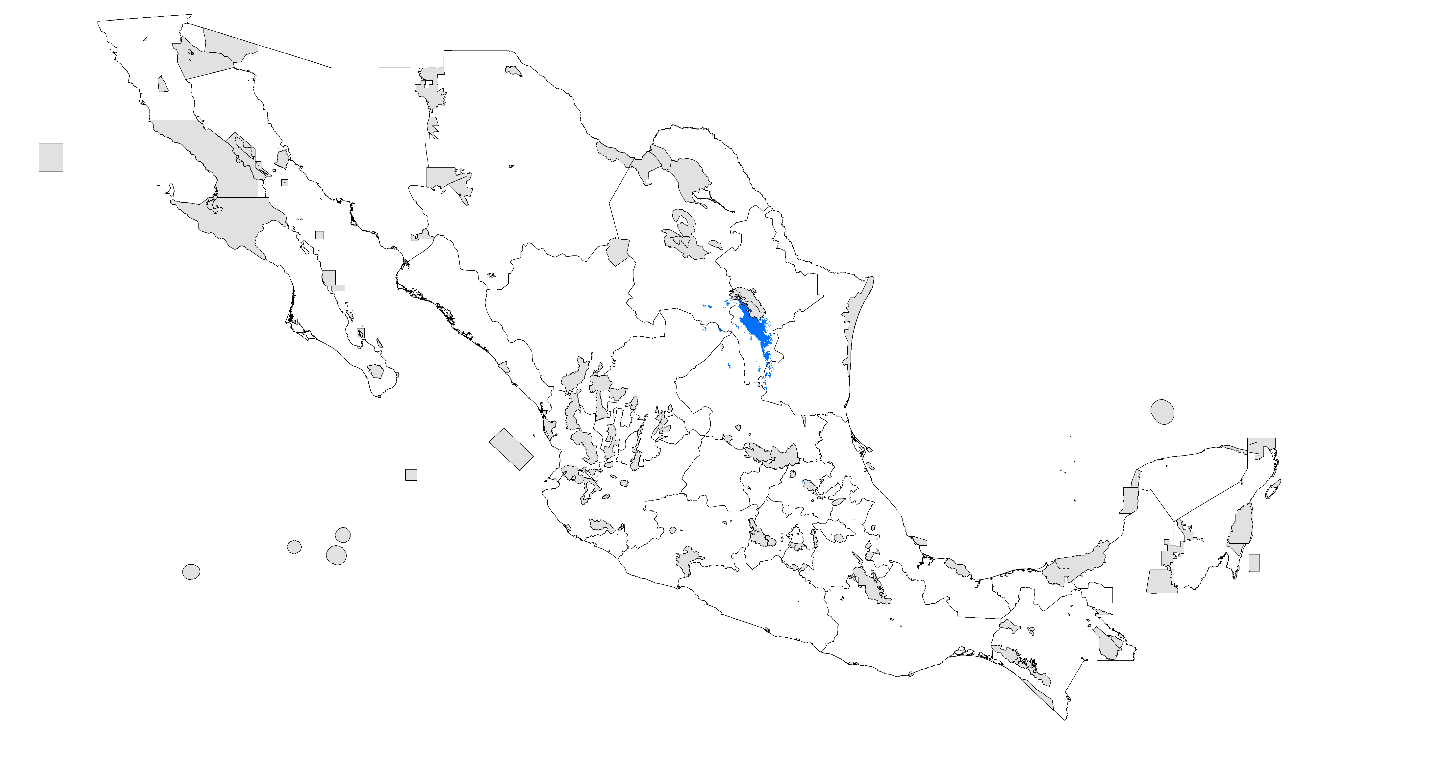


1. PDA 2080 RCP 8.5 W/m2


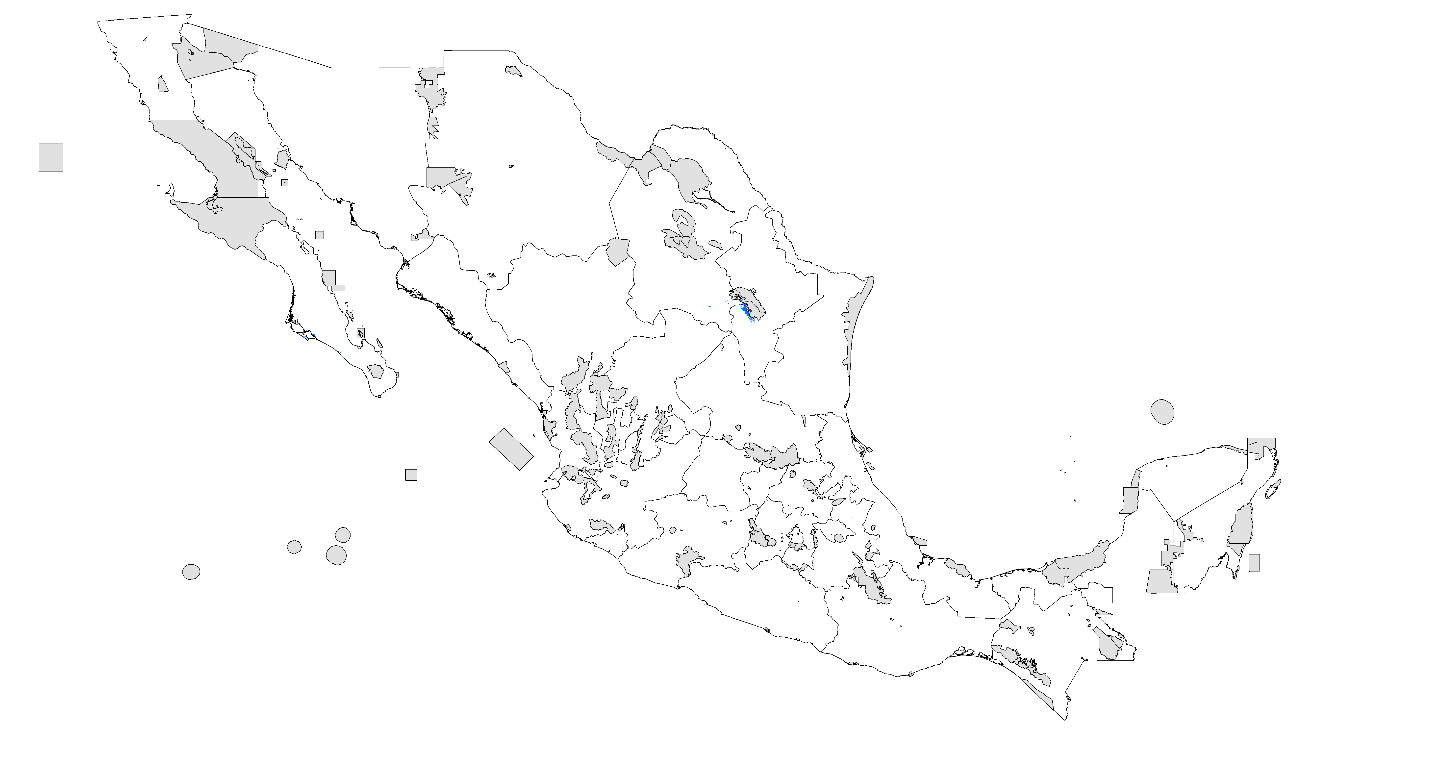


*Chihuahuanus crassimanus*

1. Records


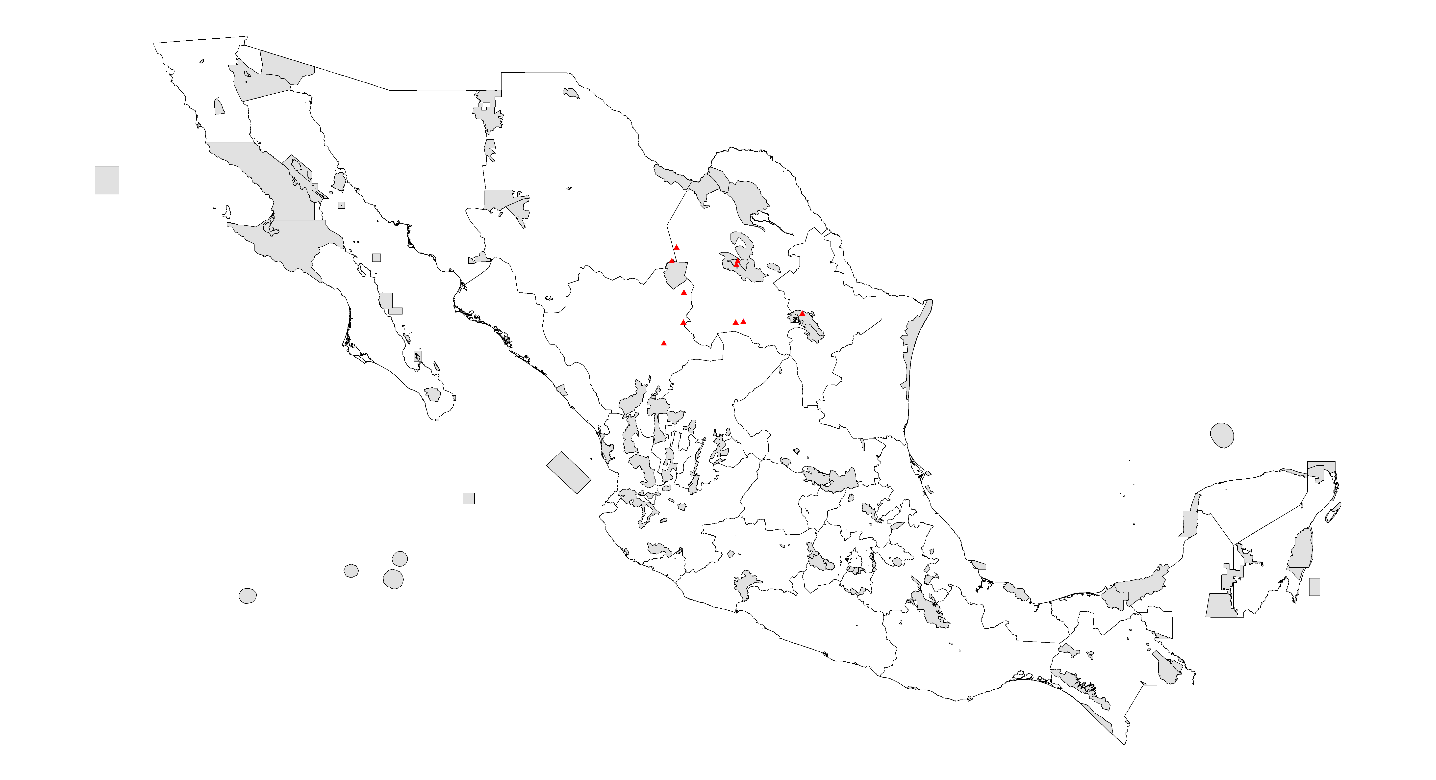


1. PDA under current climatic conditions


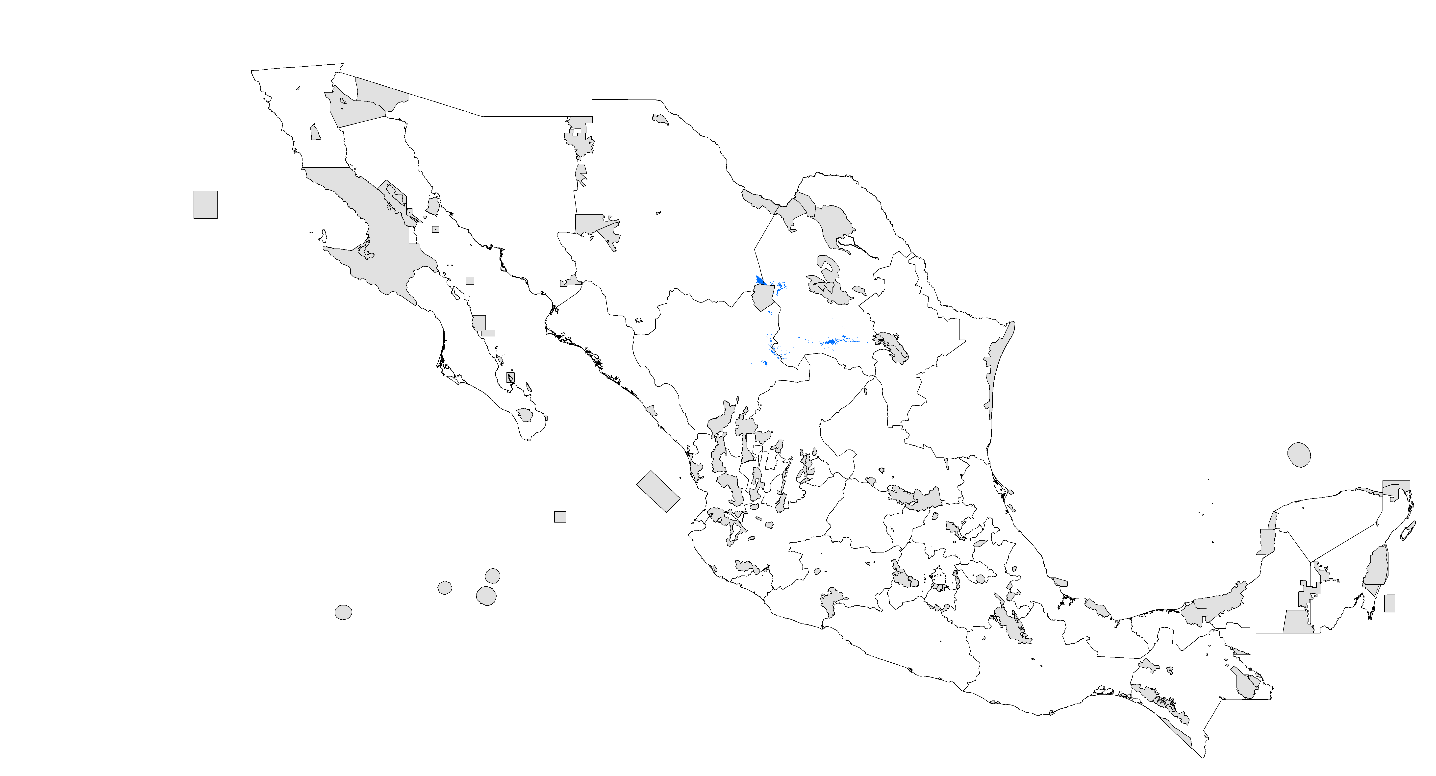


1. PDA 2020 RCP 4.5 W/m2


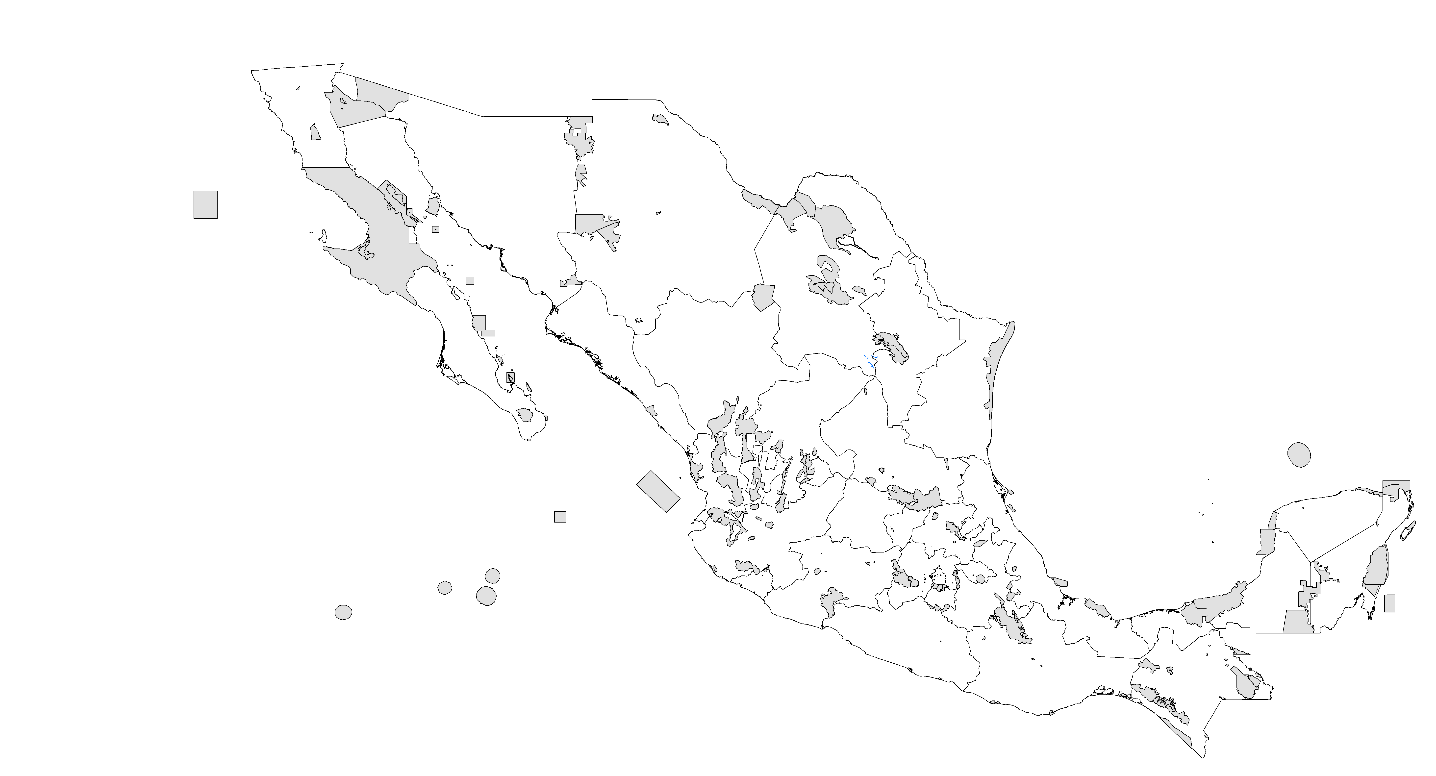


1. PDA 2020 RCP 8.5 W/m2


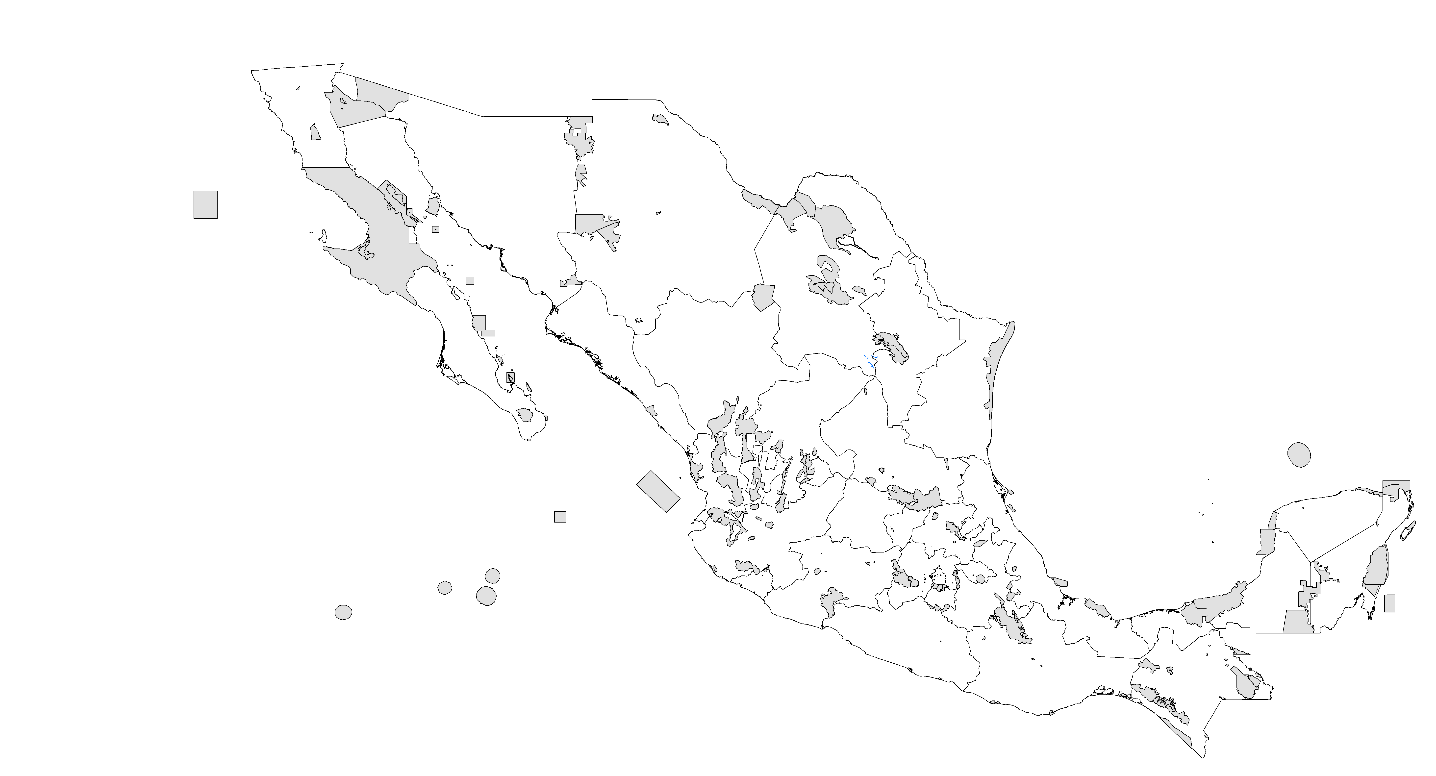


1. PDA 2080 RCP 4.5 W/m2


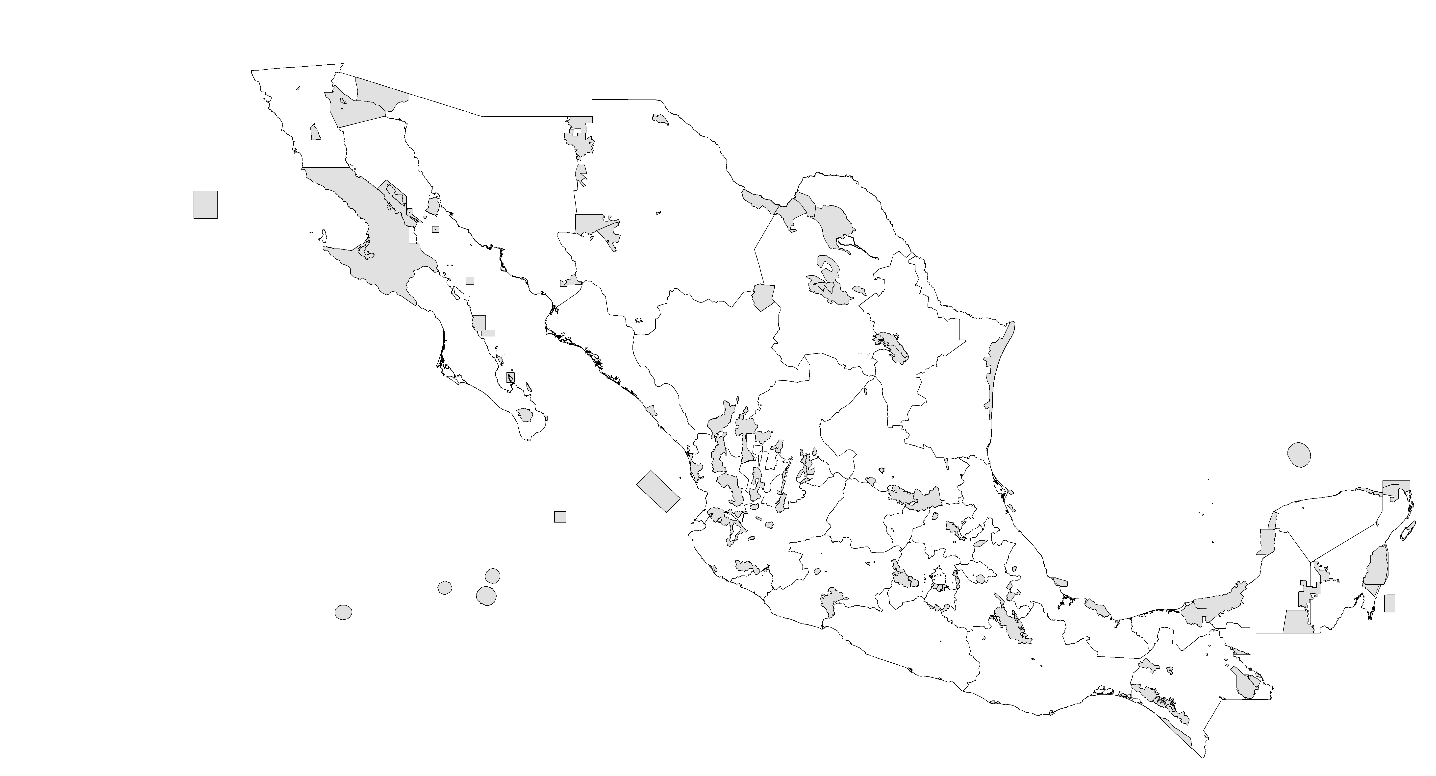


1. PDA 2080 RCP 8.5 W/m2


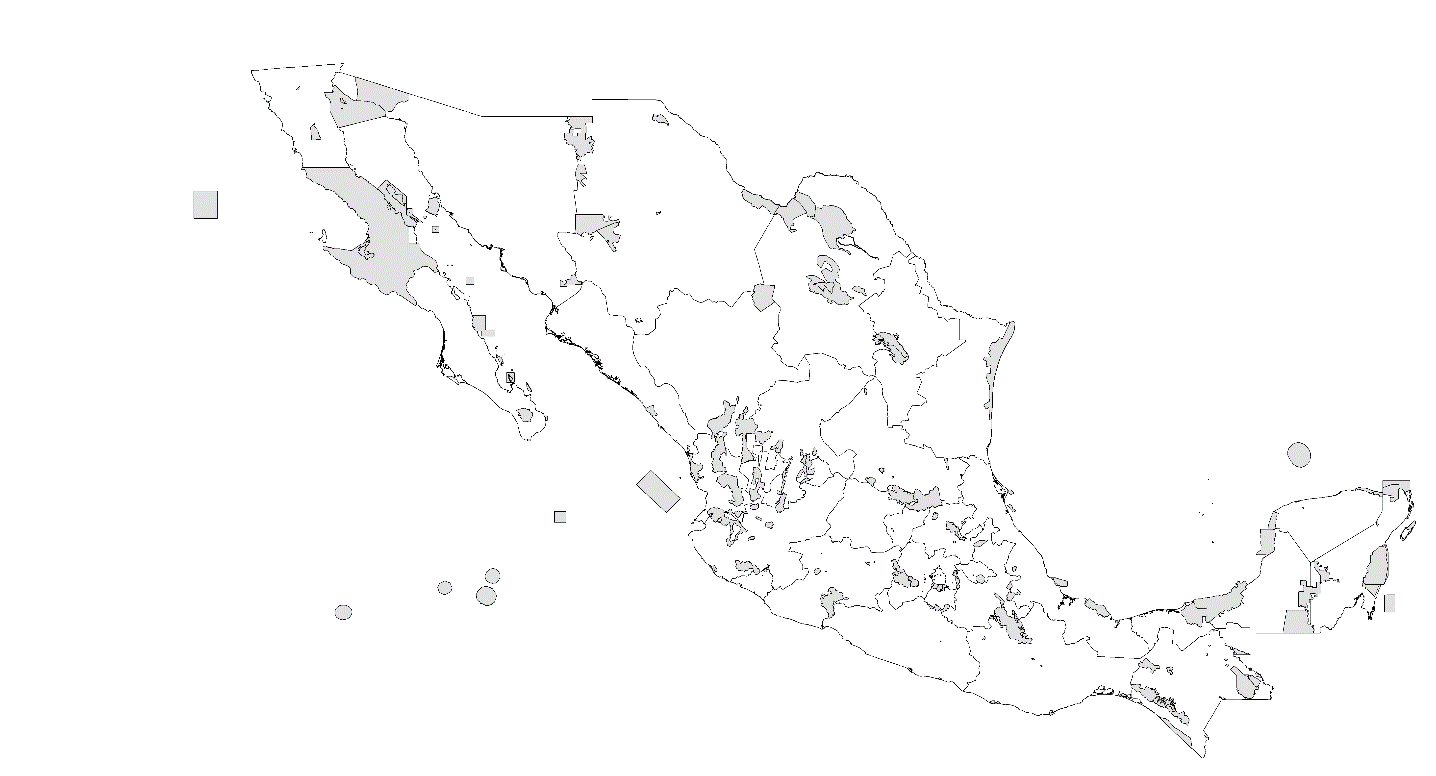


*Chihuahuanus glabrimanus*

1. Records


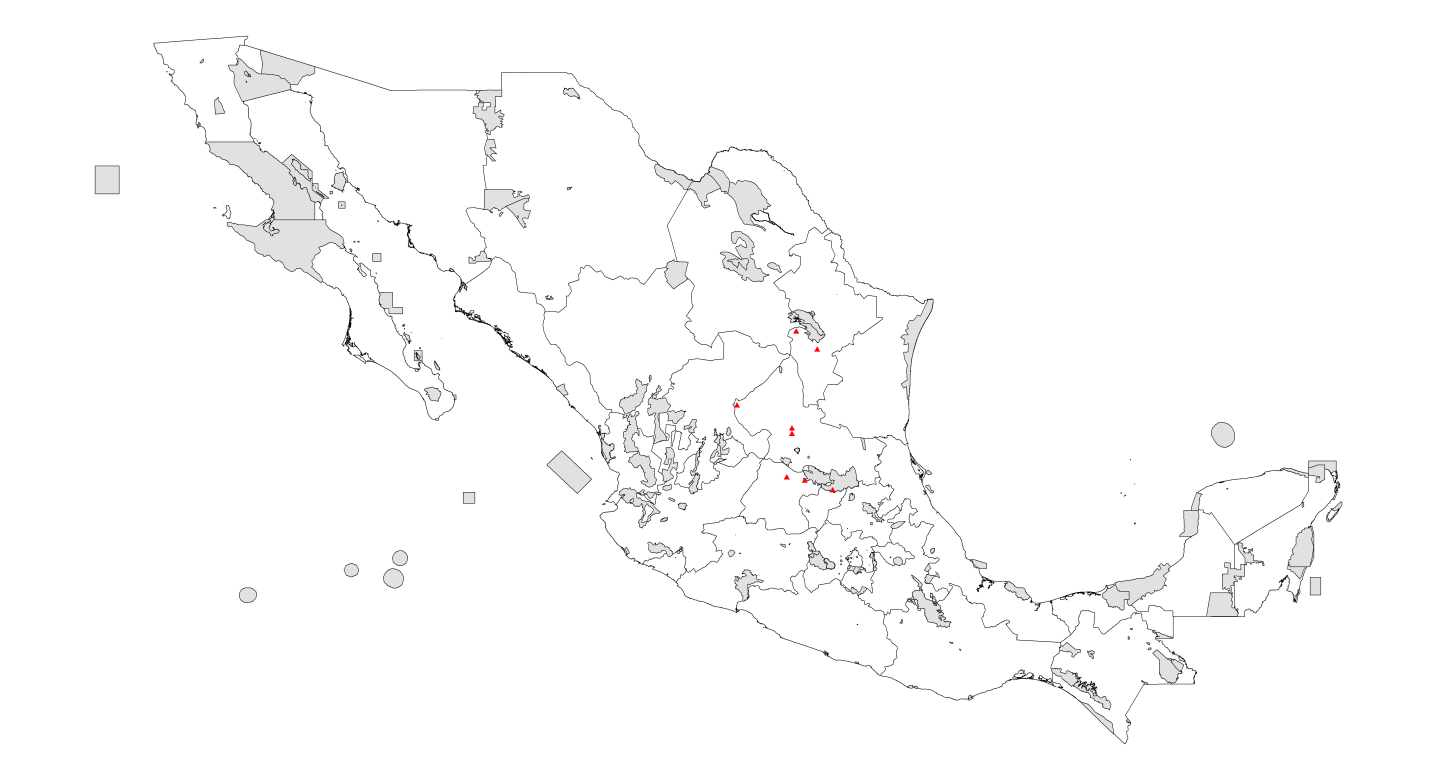


1. PDA under current climatic conditions


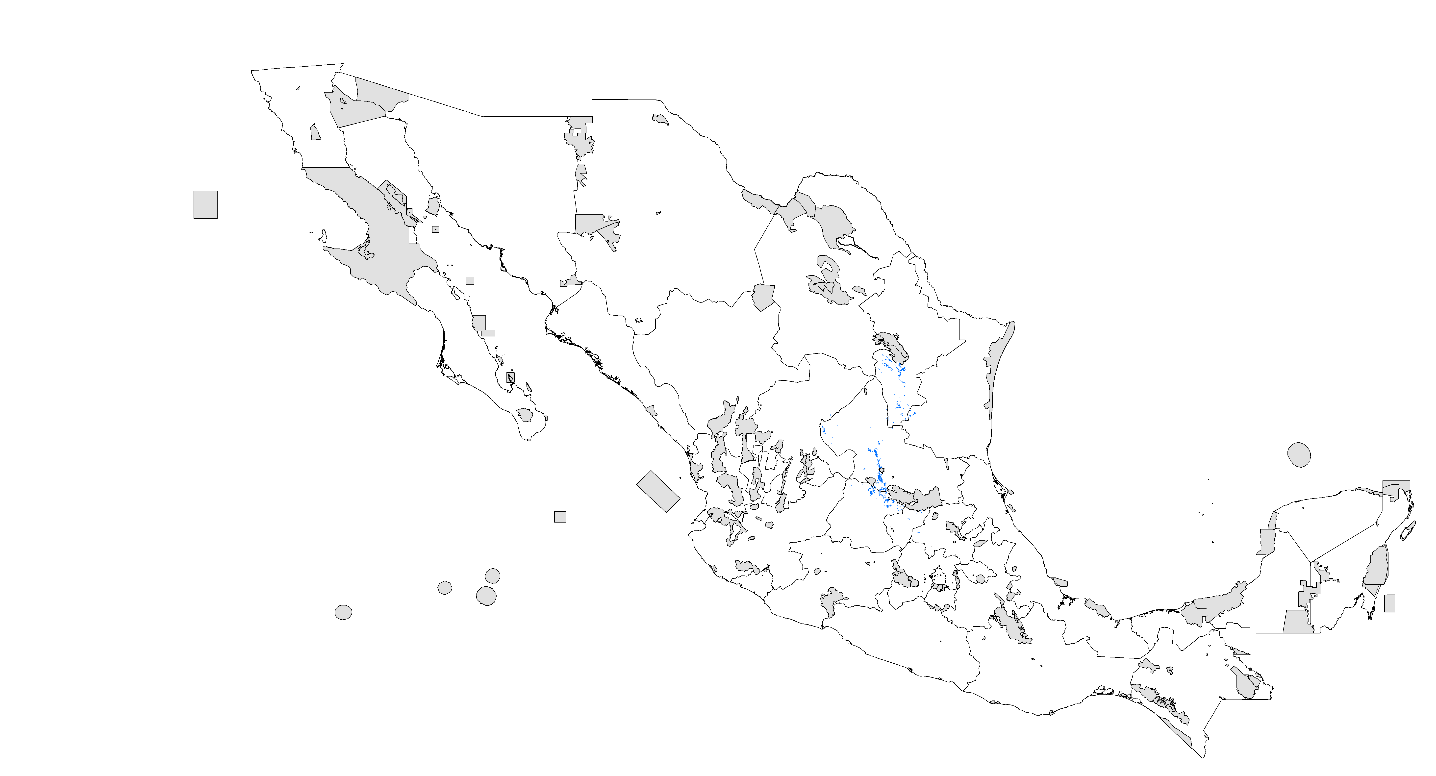


1. PDA 2020 RCP 4.5 W/m2


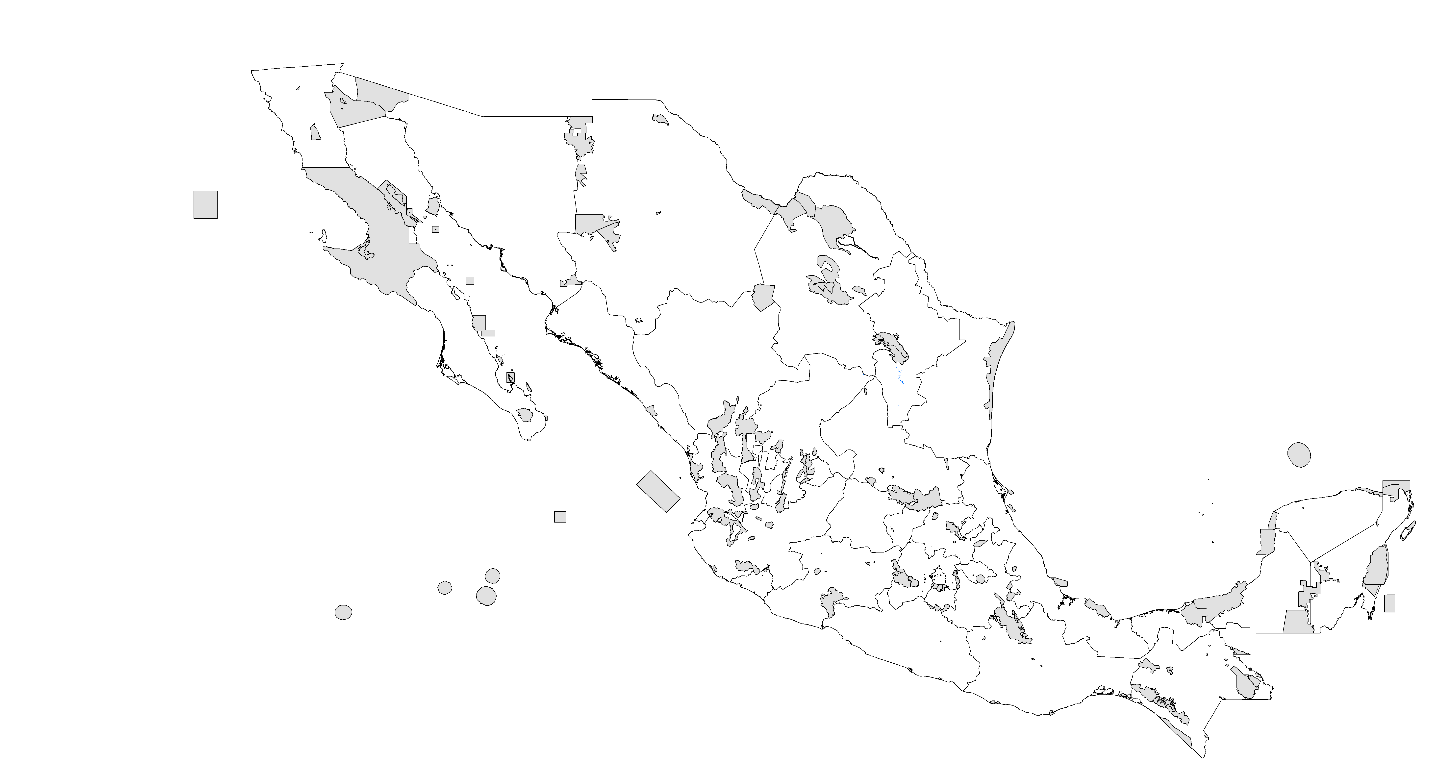


1. PDA 2020 RCP 8.5 W/m2


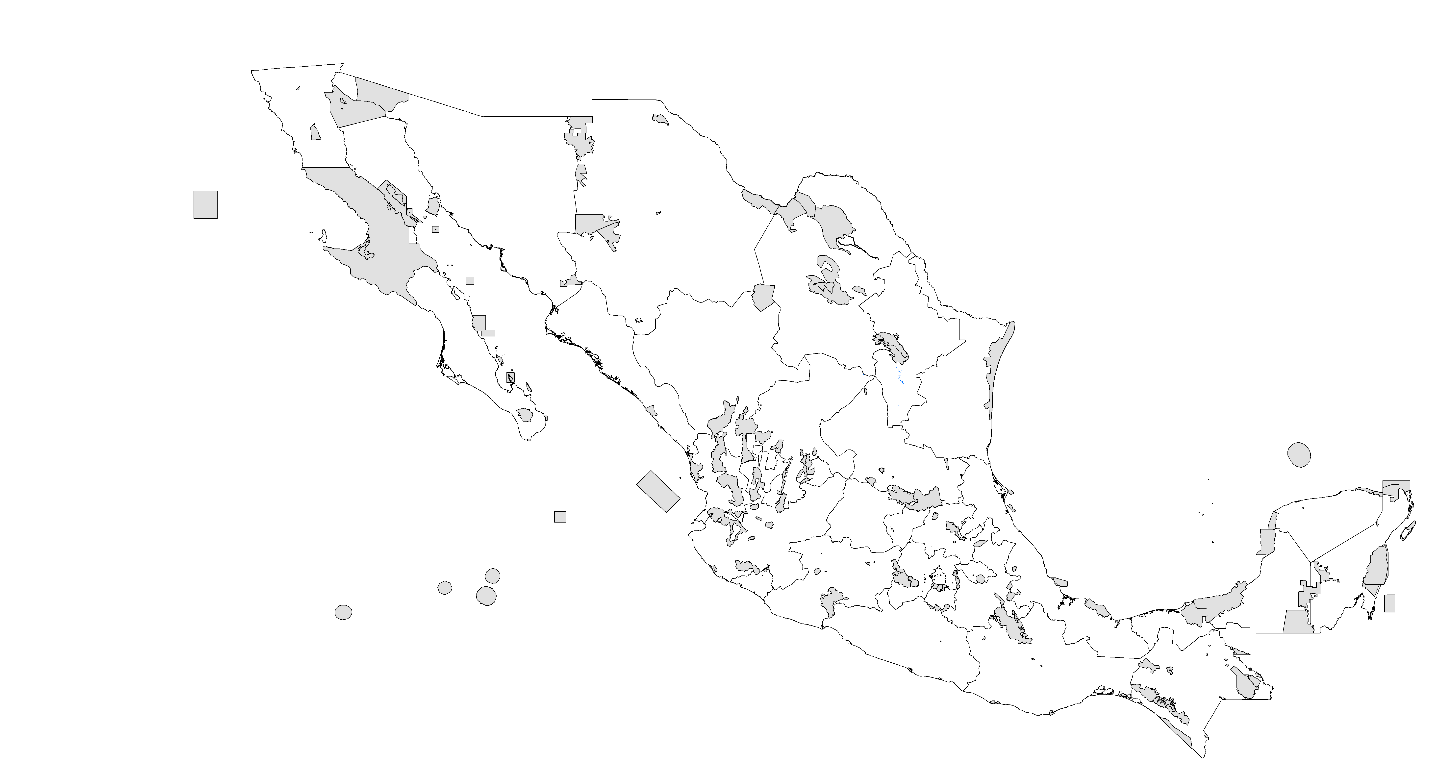


1. PDA 2080 RCP 4.5 W/m2


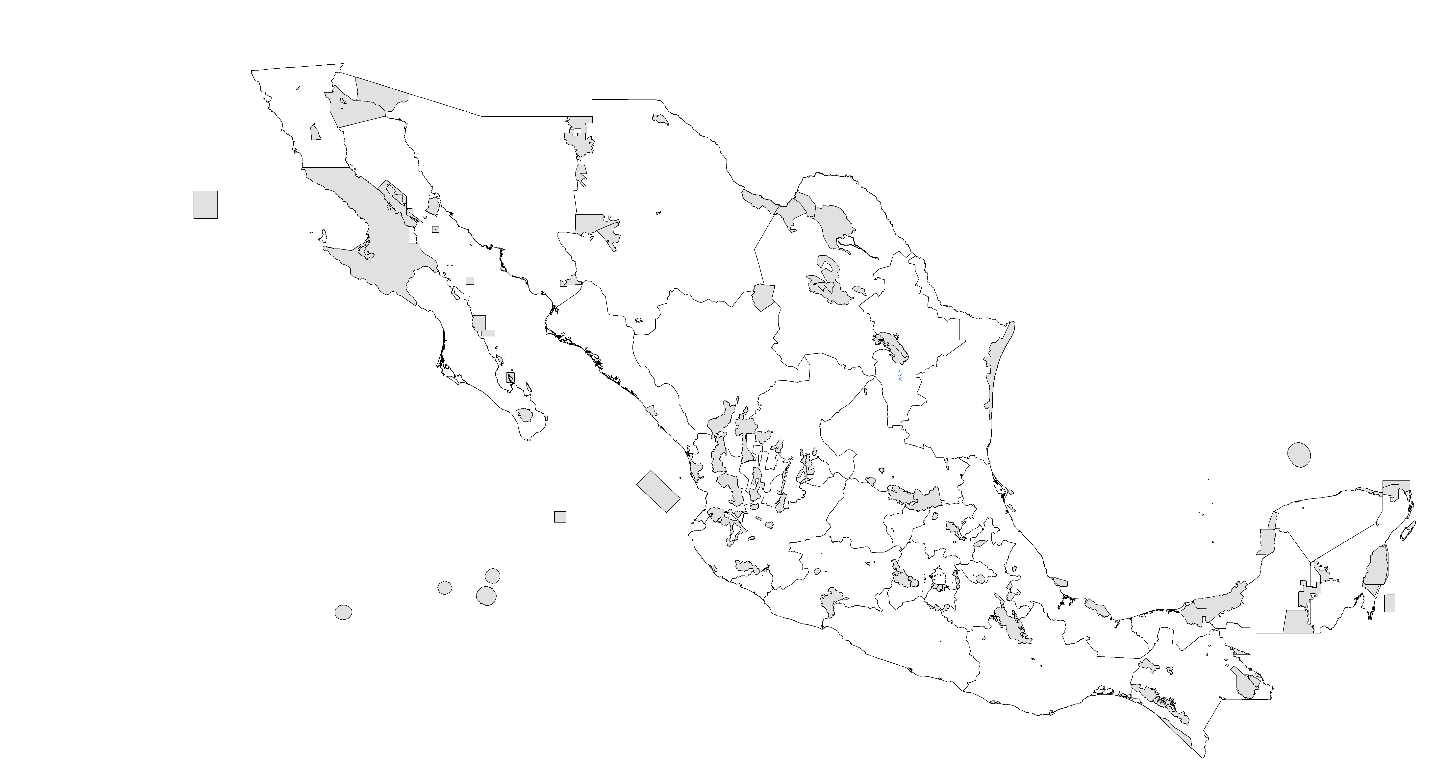


1. PDA 2080 RCP 8.5 W/m2

*
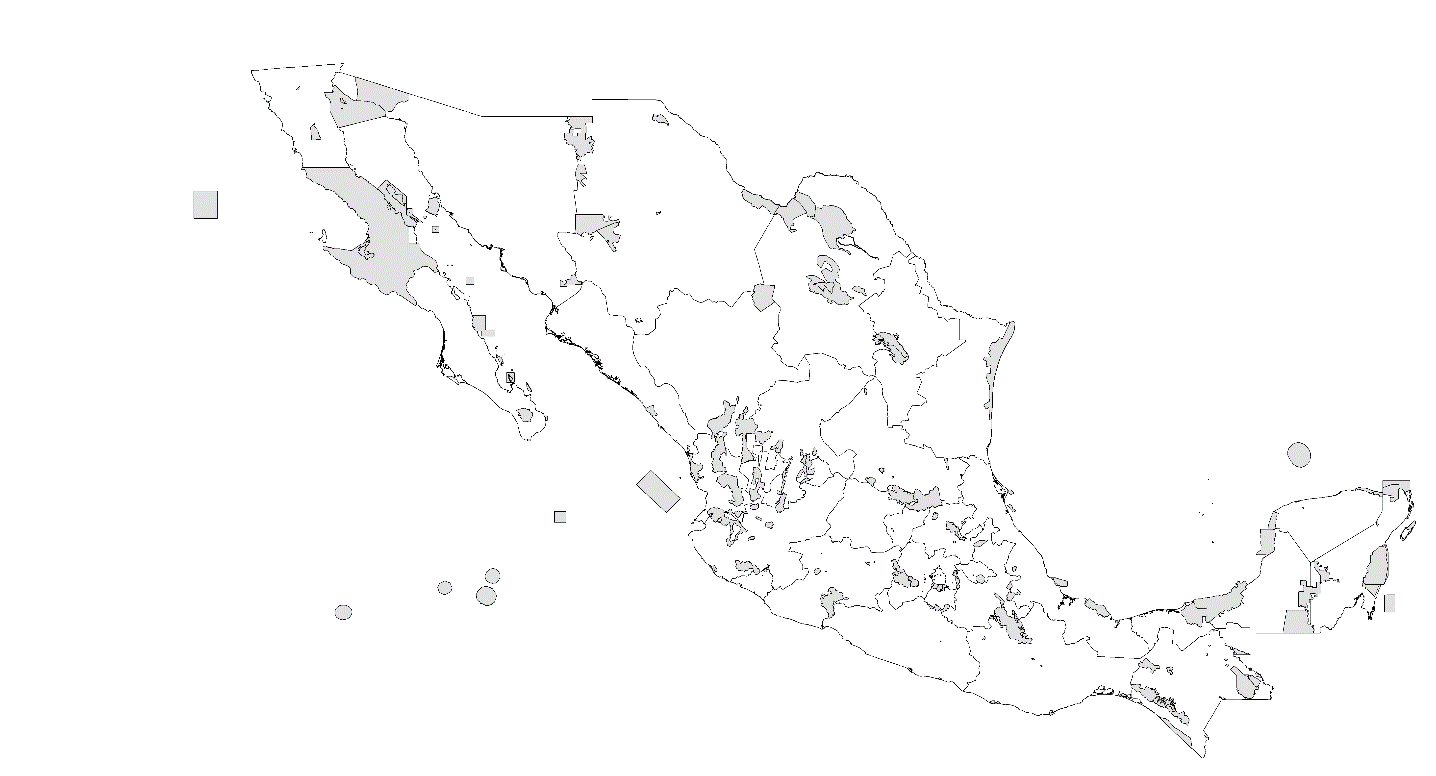
*

*Diplocenrus zacatecanus*

1. Records


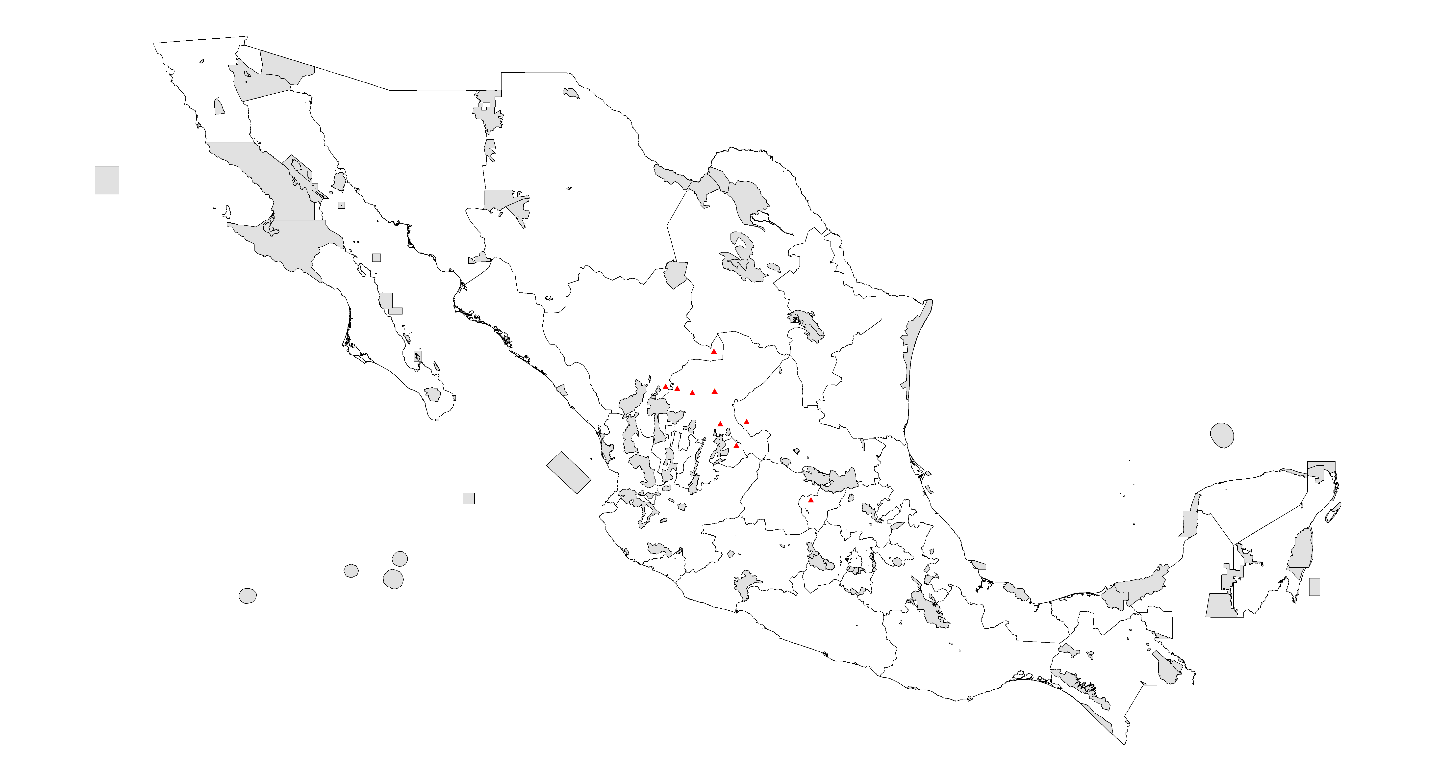


1. PDA under current climatic conditions


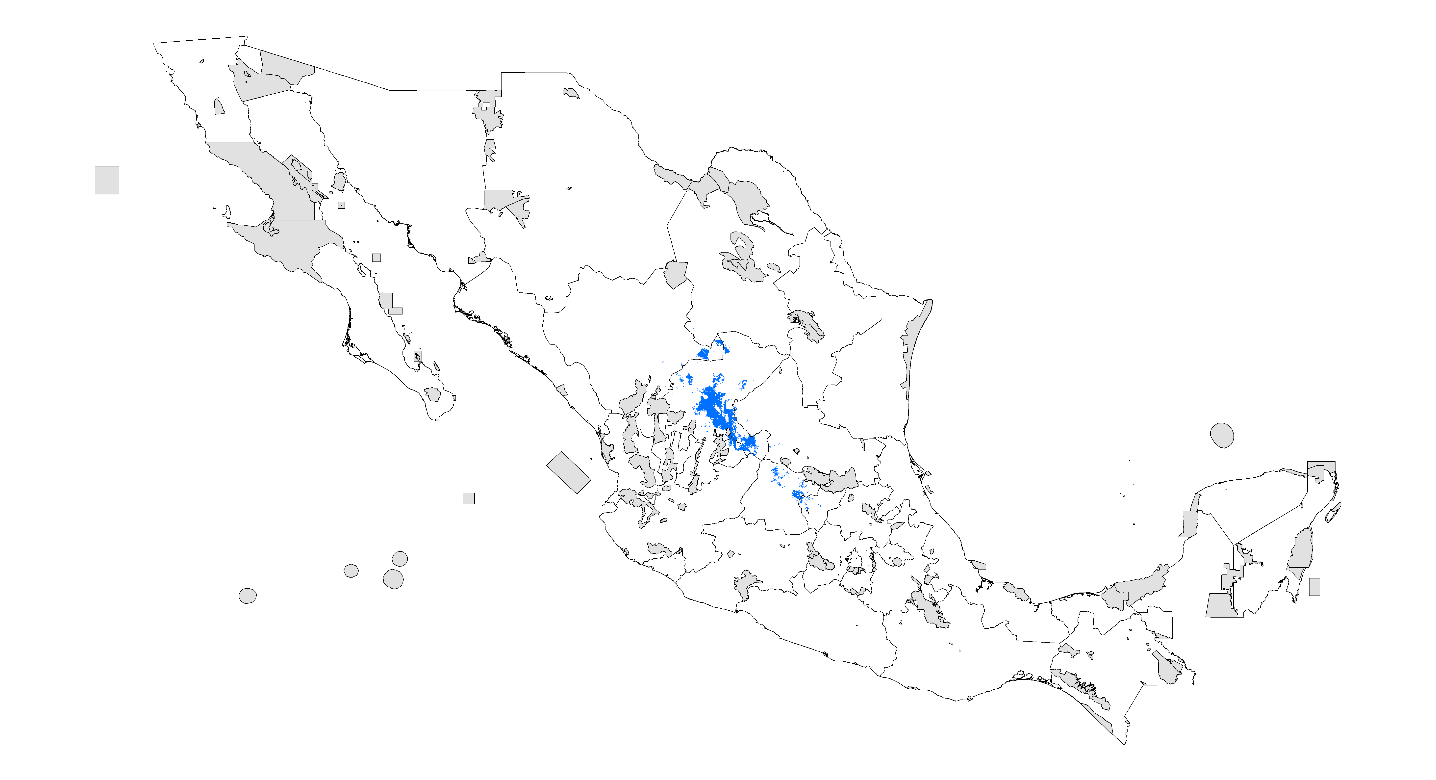


1. PDA 2020 RCP 4.5 W/m2


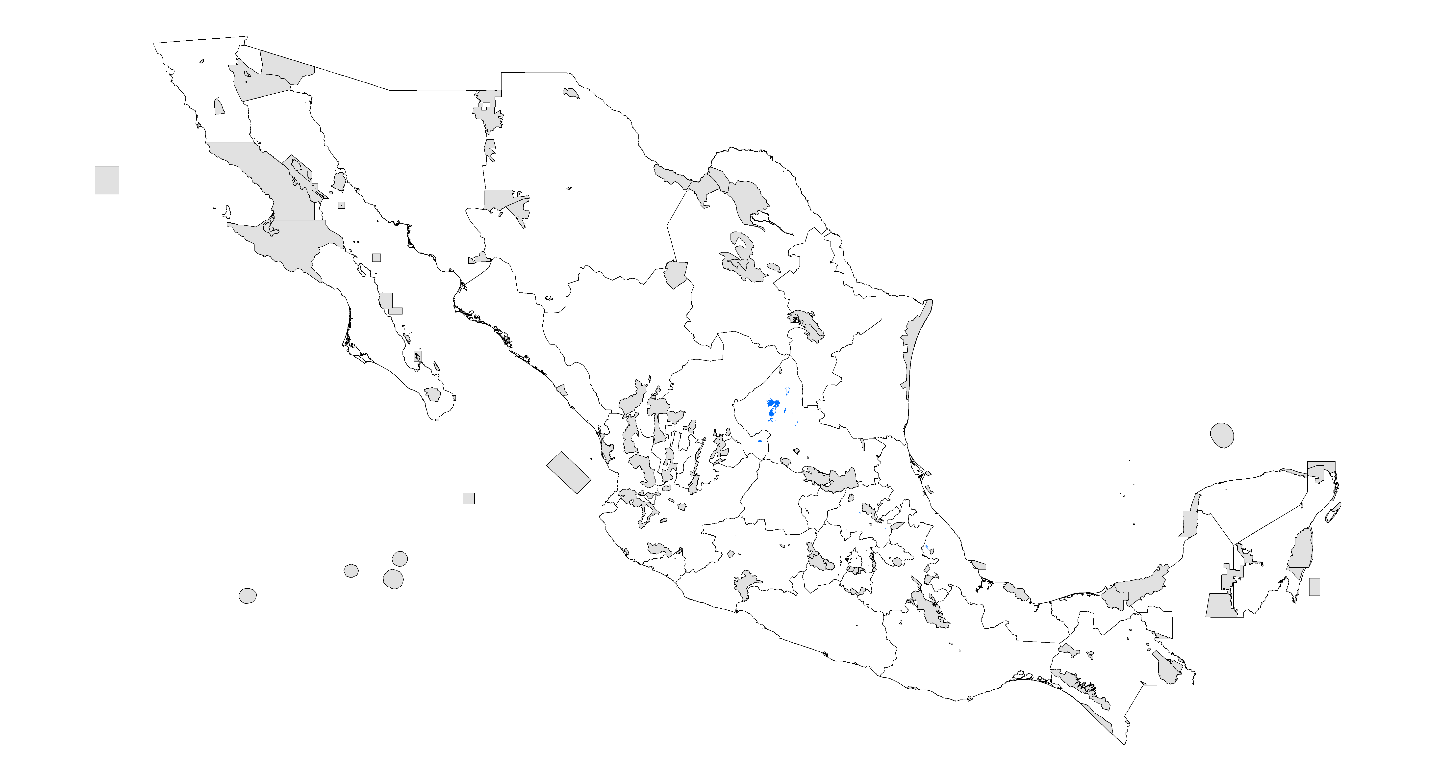


1. PDA 2020 RCP 8.5 W/m2


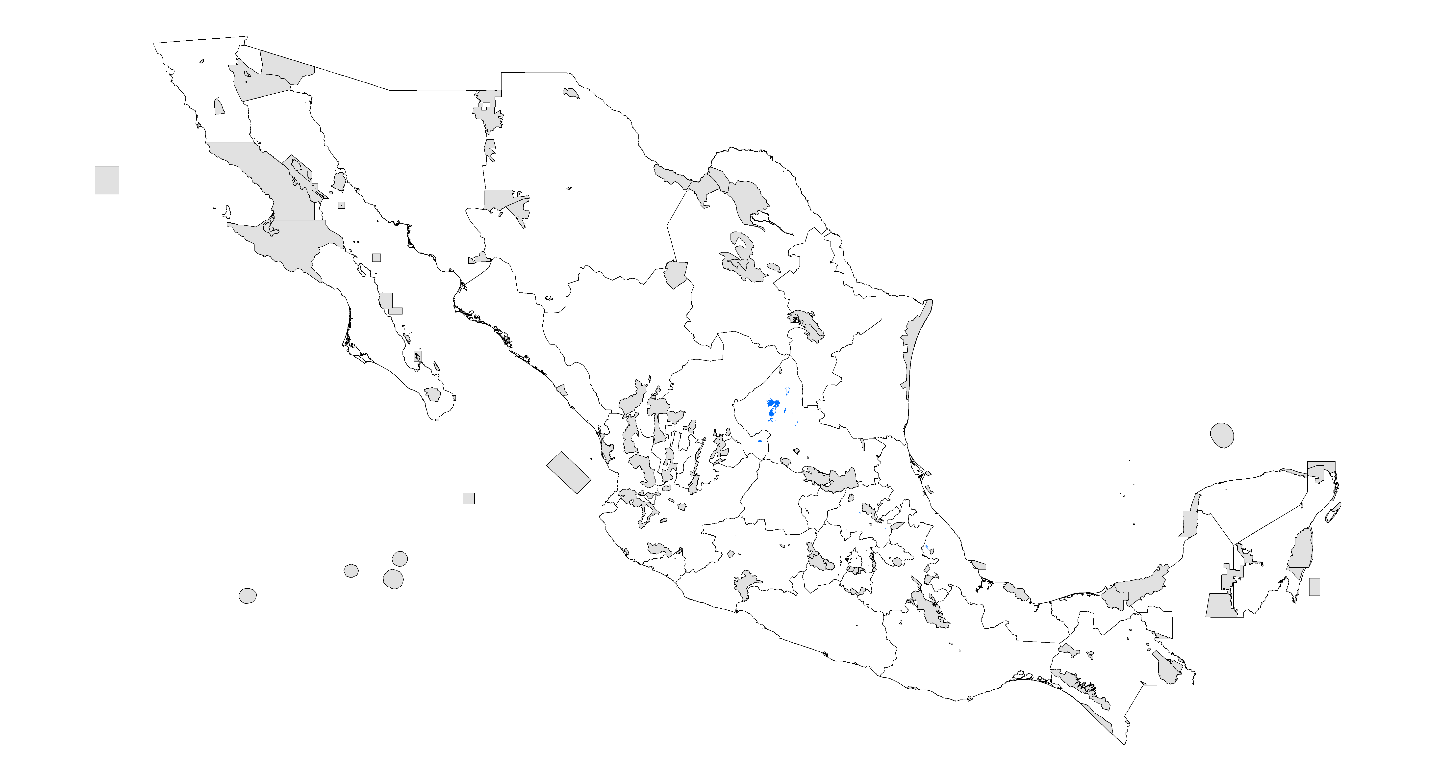


1. PDA 2080 RCP 4.5 W/m2


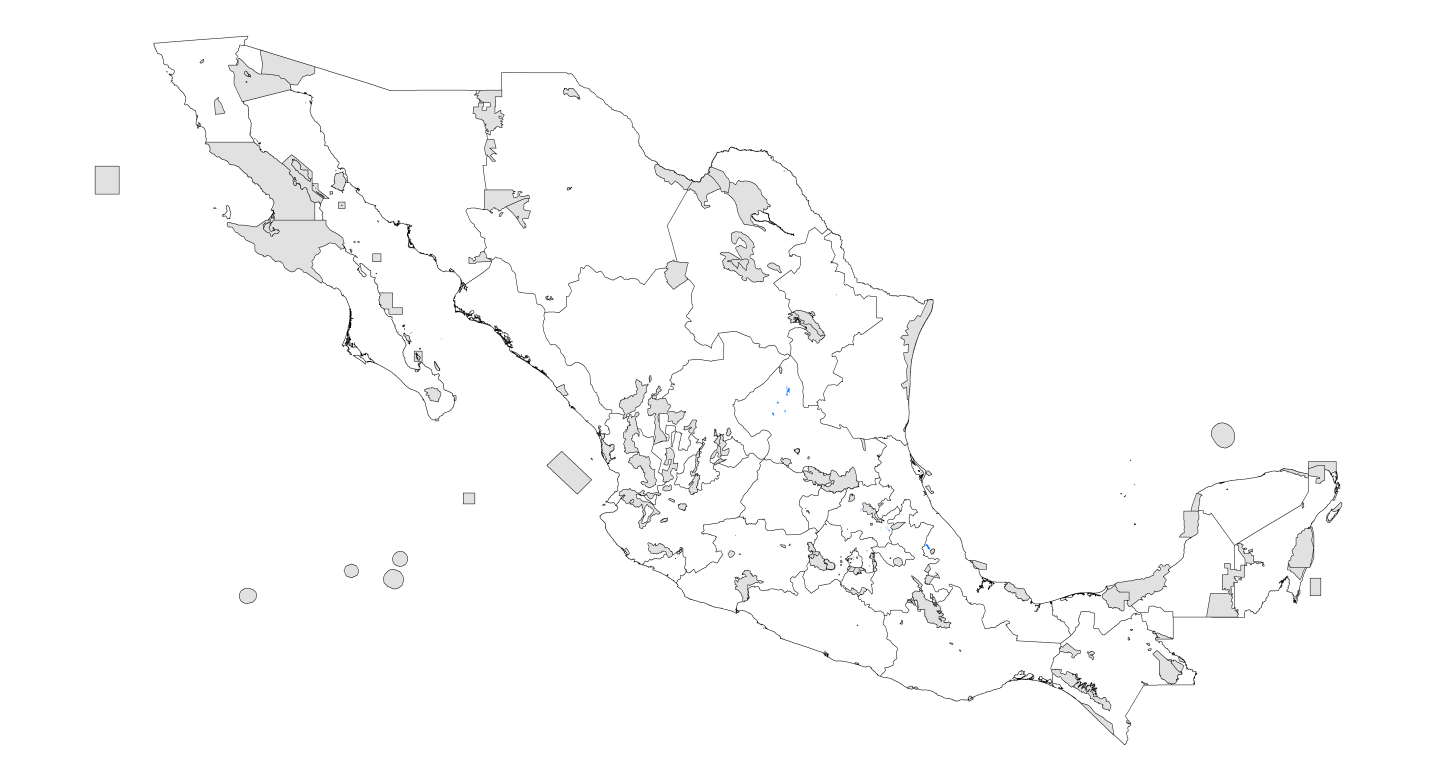


1. PDA 2080 RCP 8.5 W/m2

*
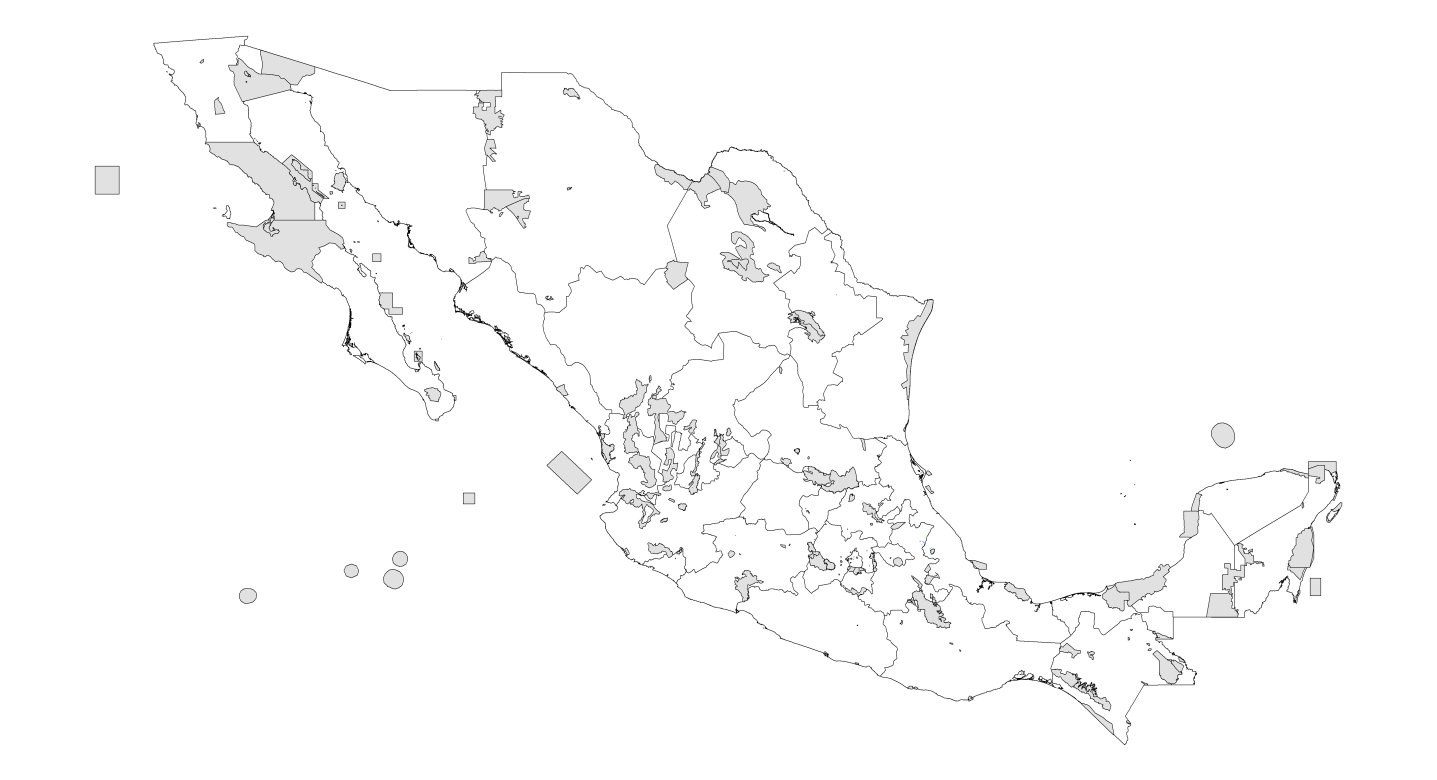
*

*Diplocentur reddelli*

1. Records


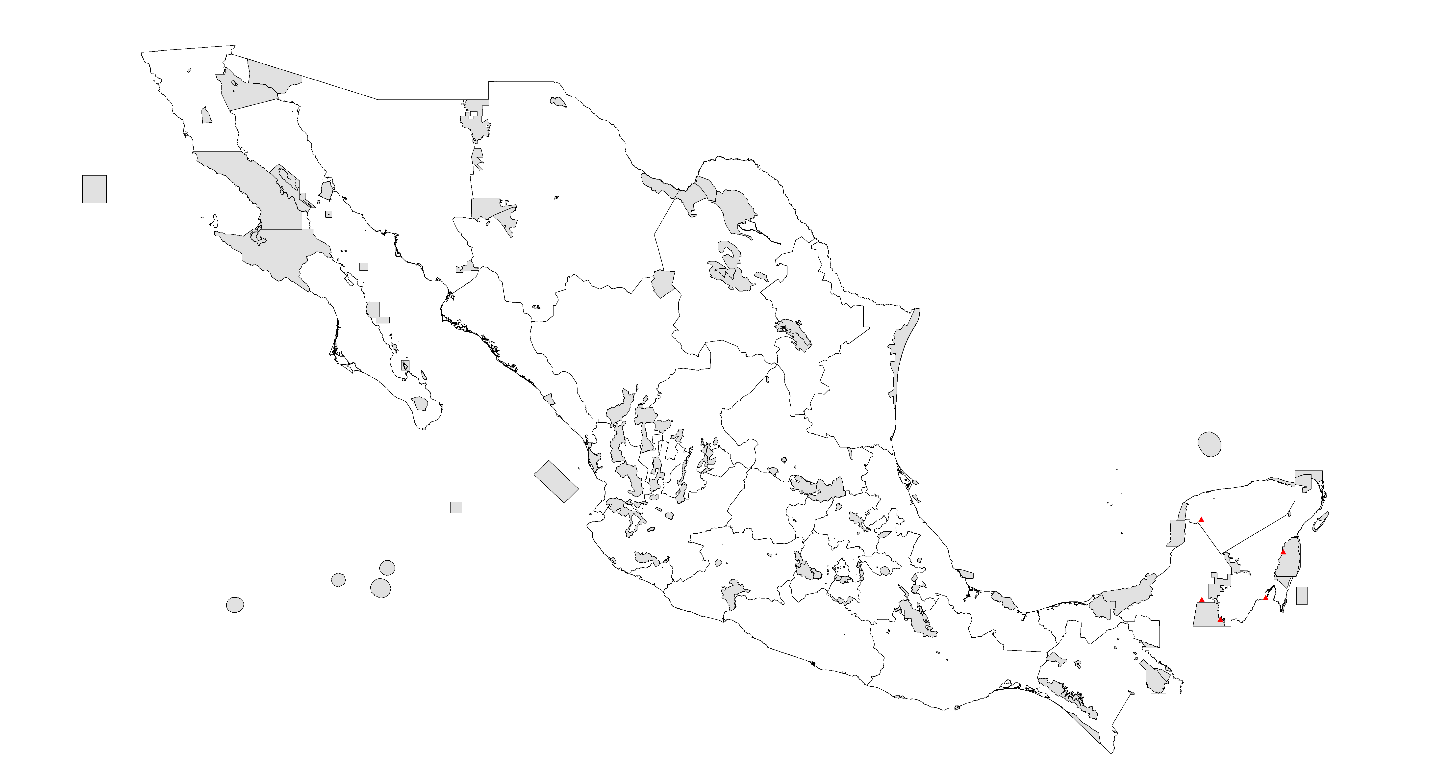


1. PDA under current climatic conditions


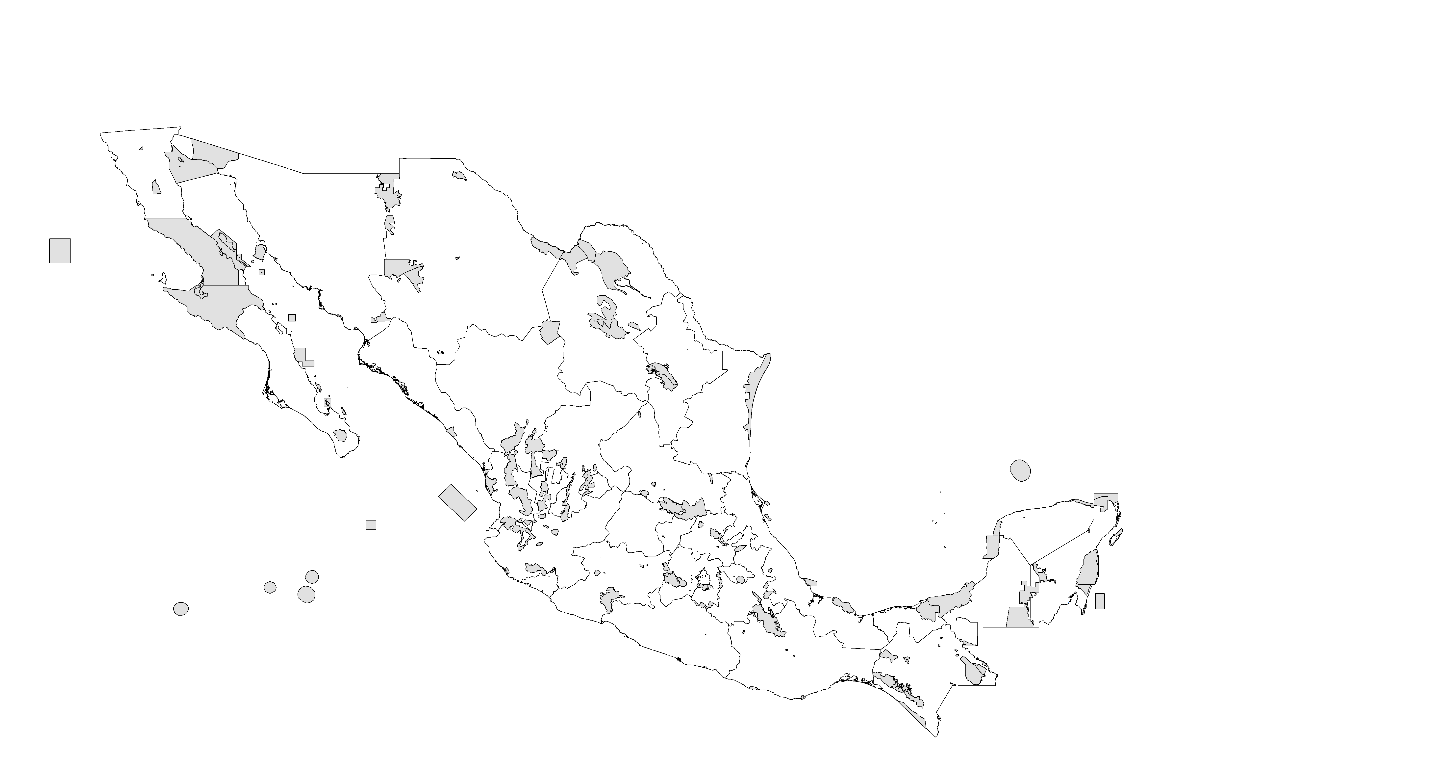


1. PDA 2020 RCP 4.5 W/m2


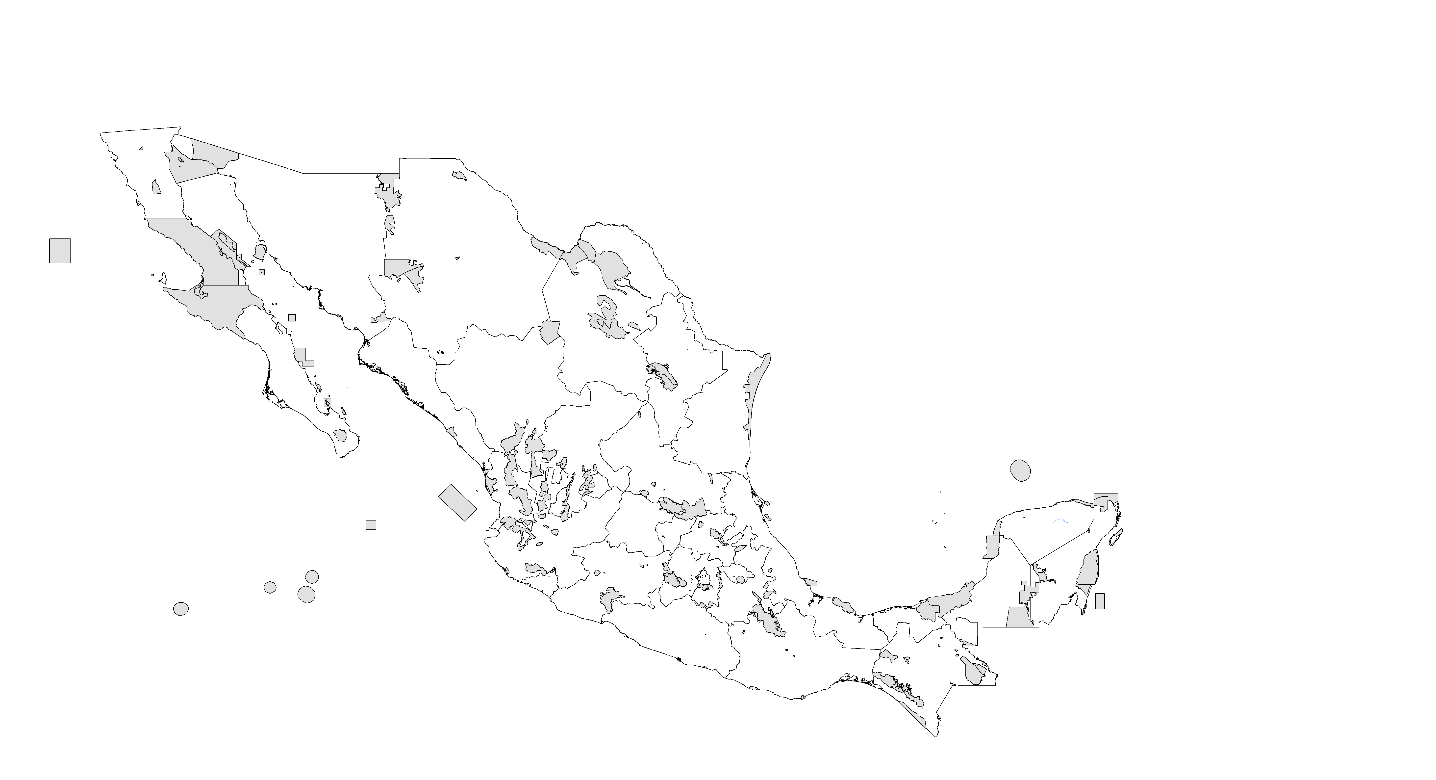


1. PDA 2020 RCP 8.5 W/m2


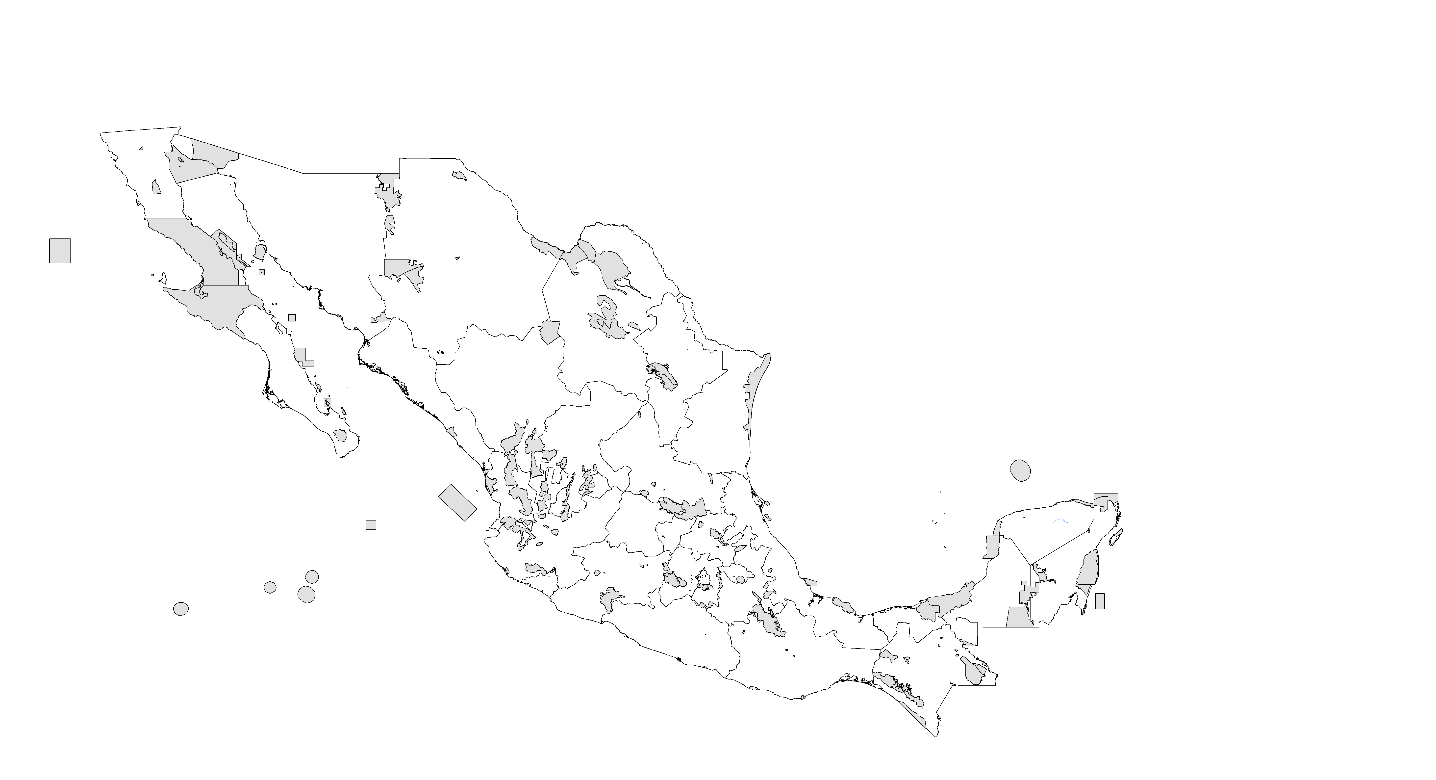


1. PDA 2080 RCP 4.5 W/m2


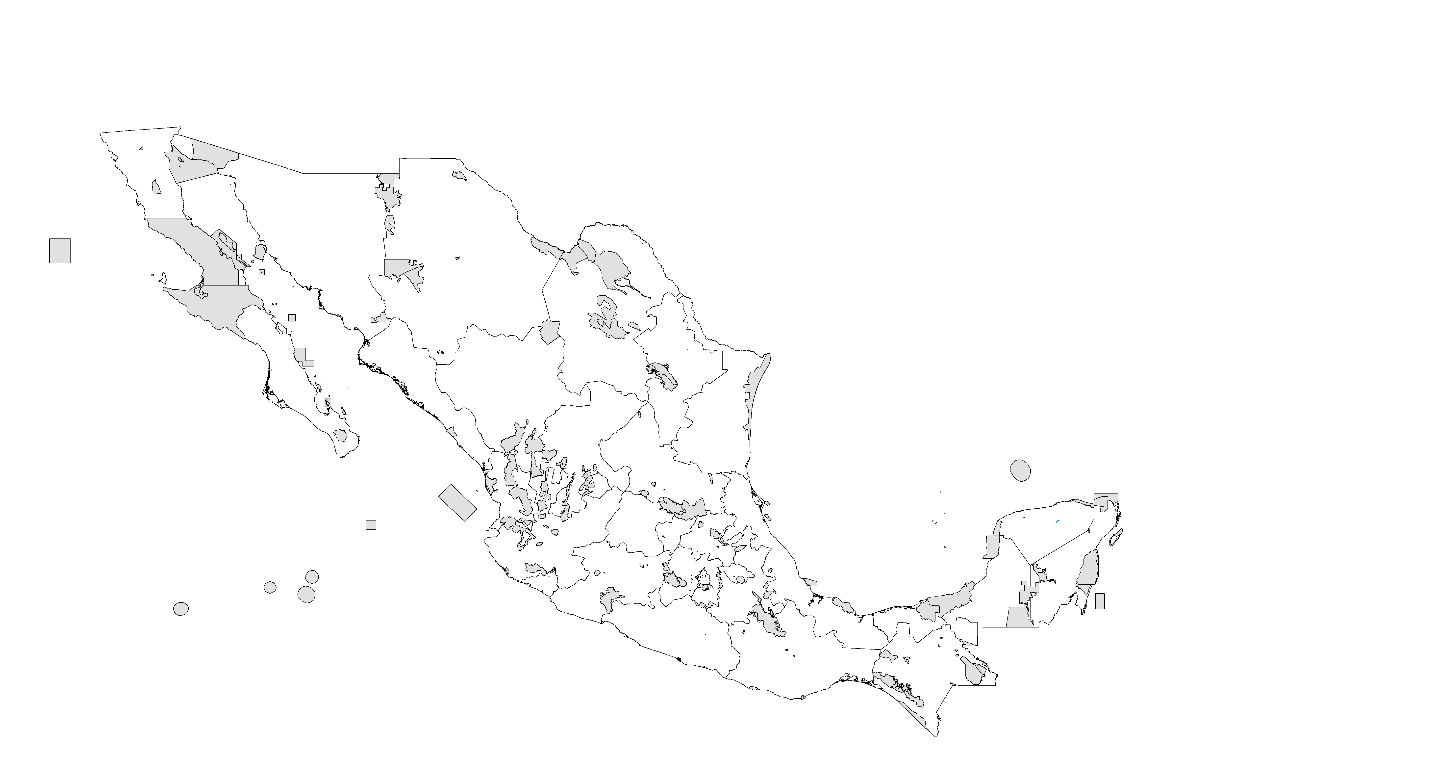


1. PDA 2080 RCP 8.5 W/m2

*
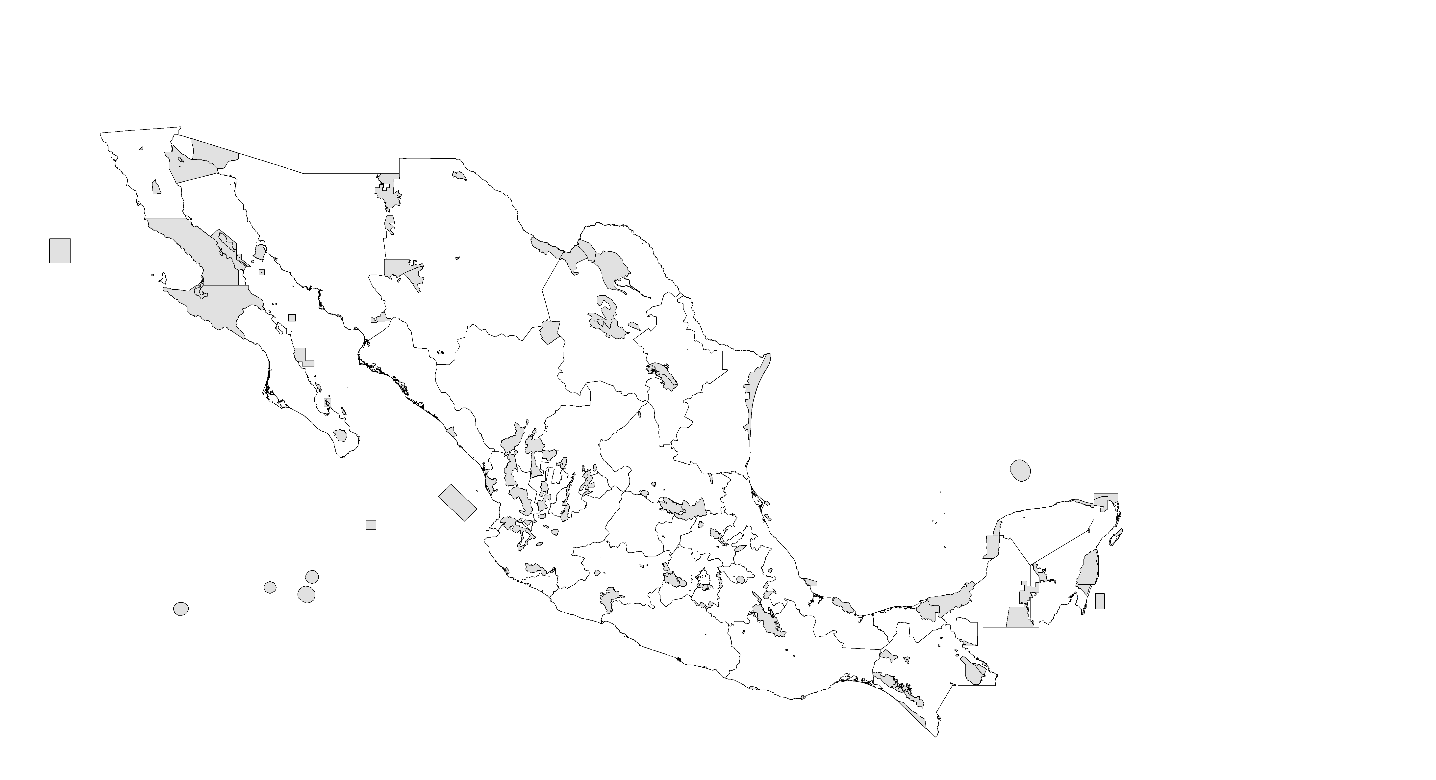
*

*Hadrurus concolorus*

1. Records


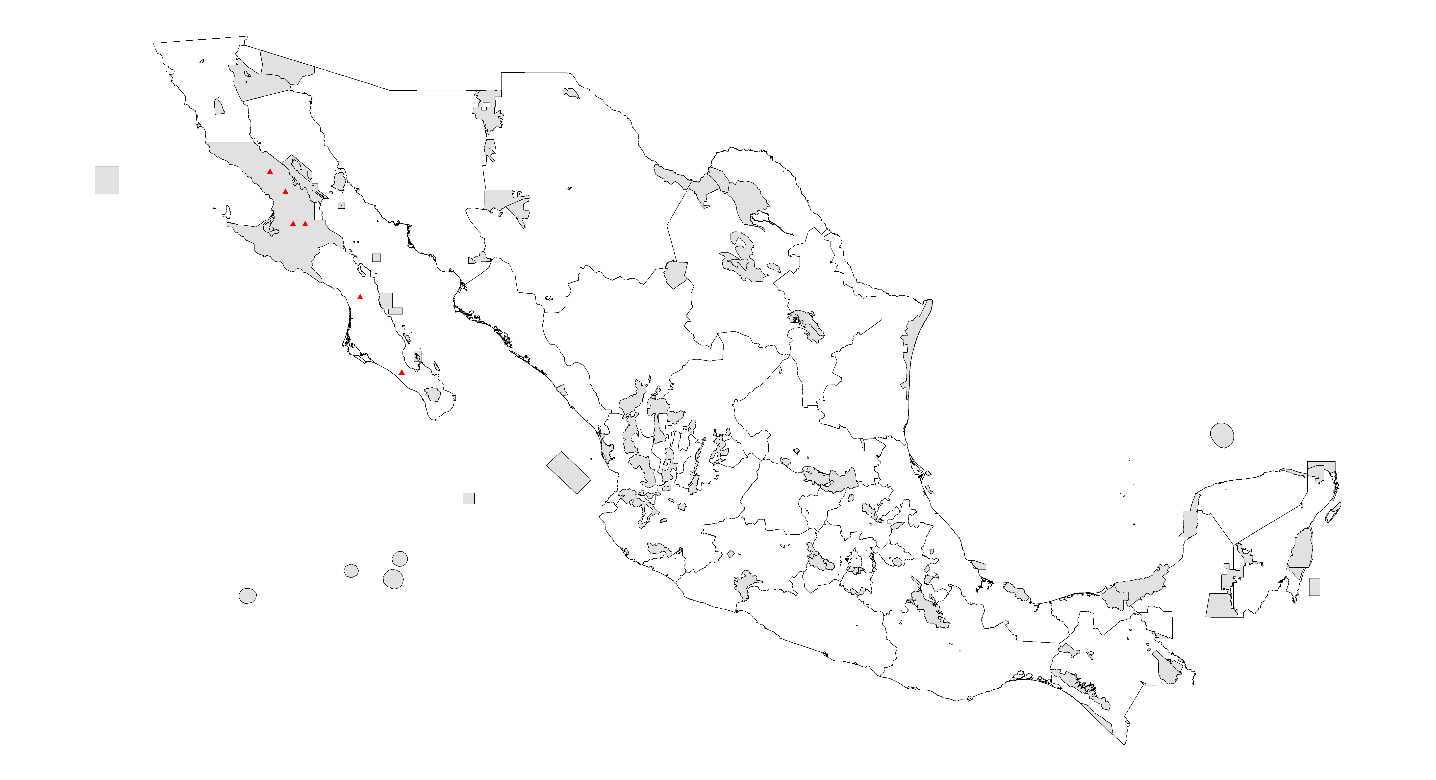


1. PDA under current climatic conditions


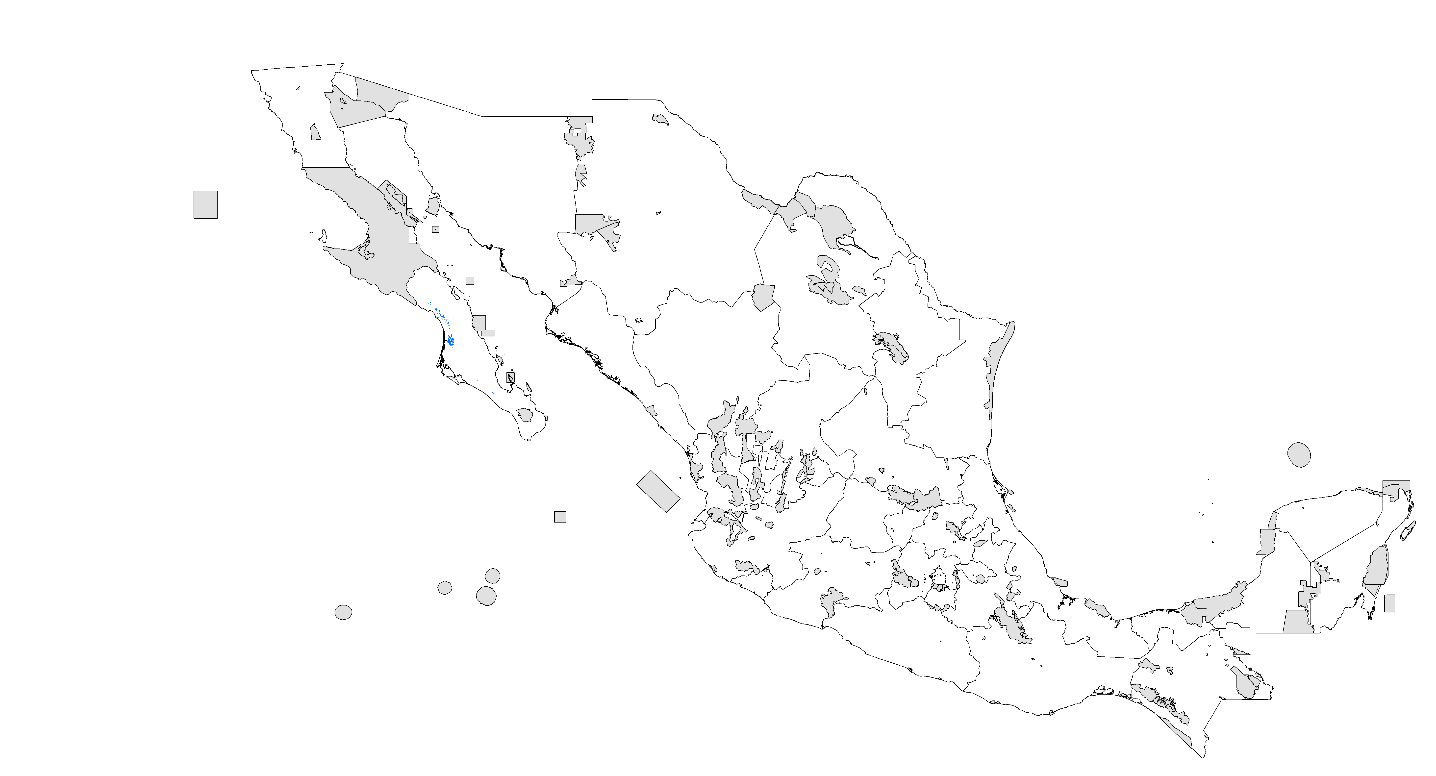


1. PDA 2020 RCP 4.5 W/m2


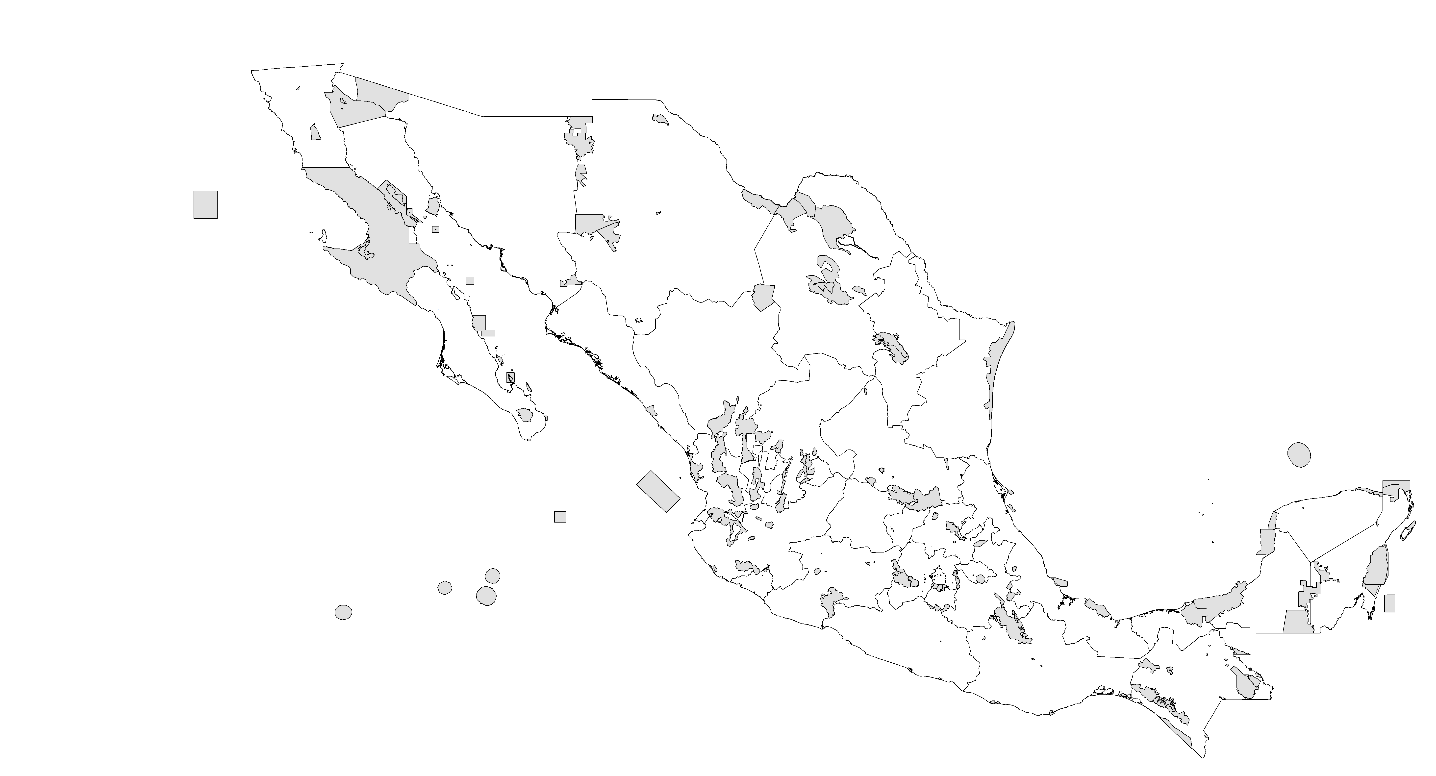


1. PDA 2020 RCP 8.5 W/m2


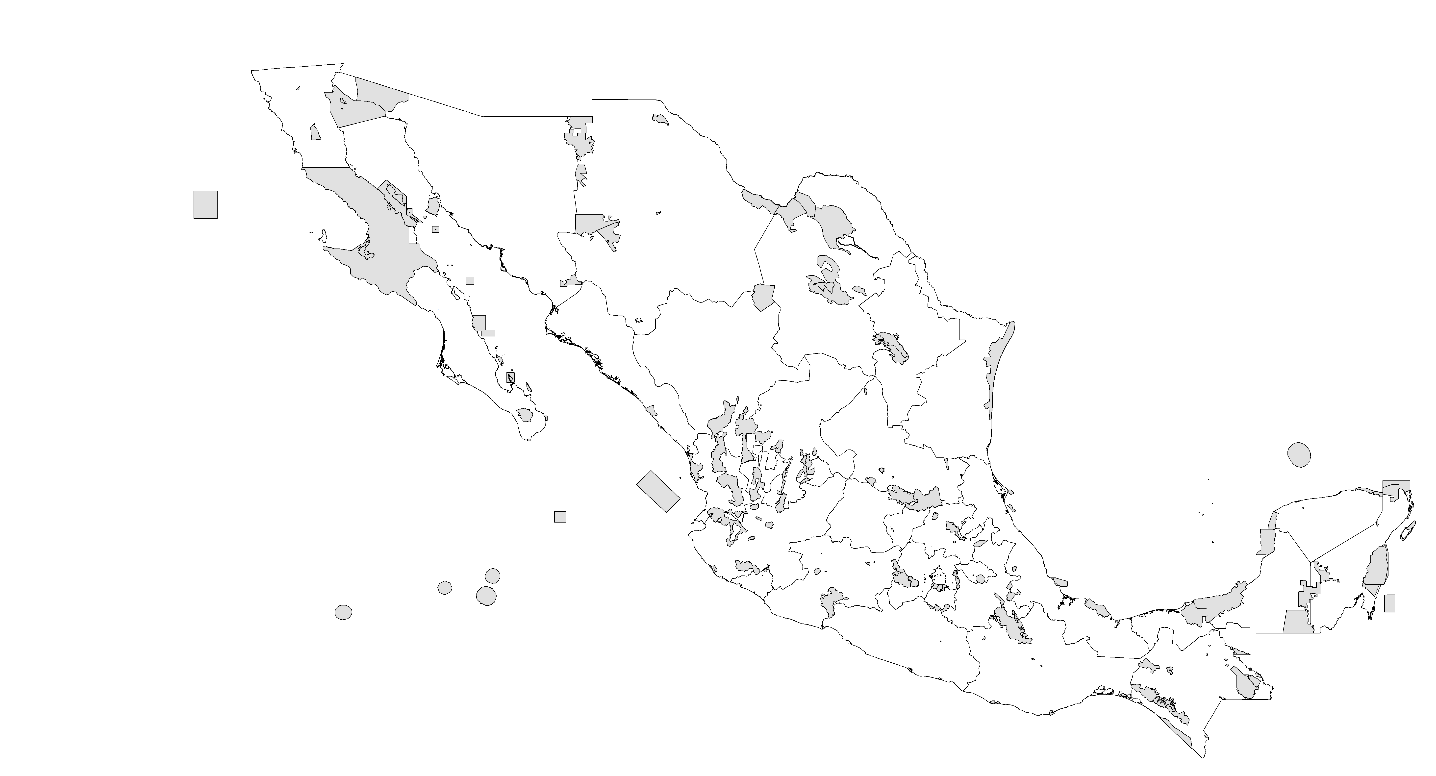


1. PDA 2080 RCP 4.5 W/m2


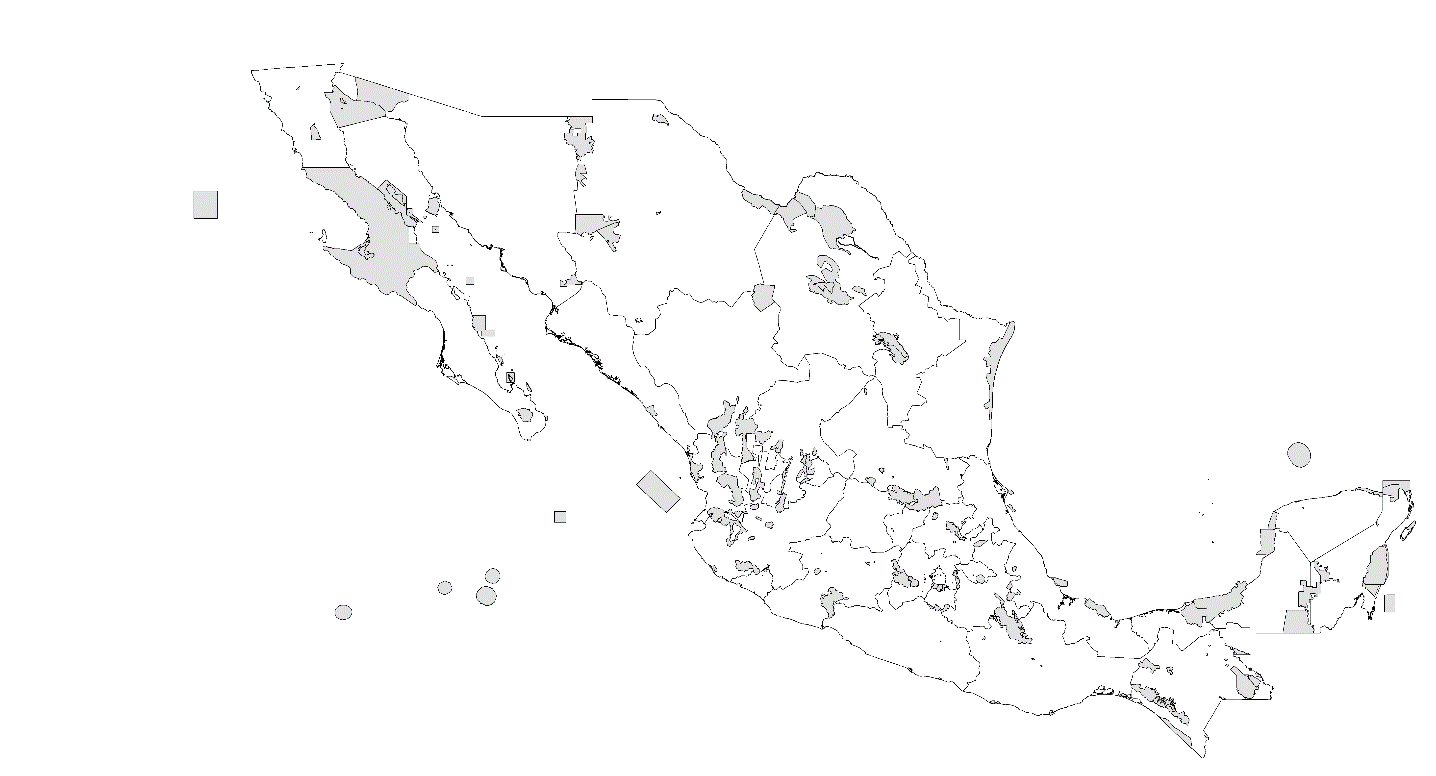


1. PDA 2080 RCP 8.5 W/m2

*
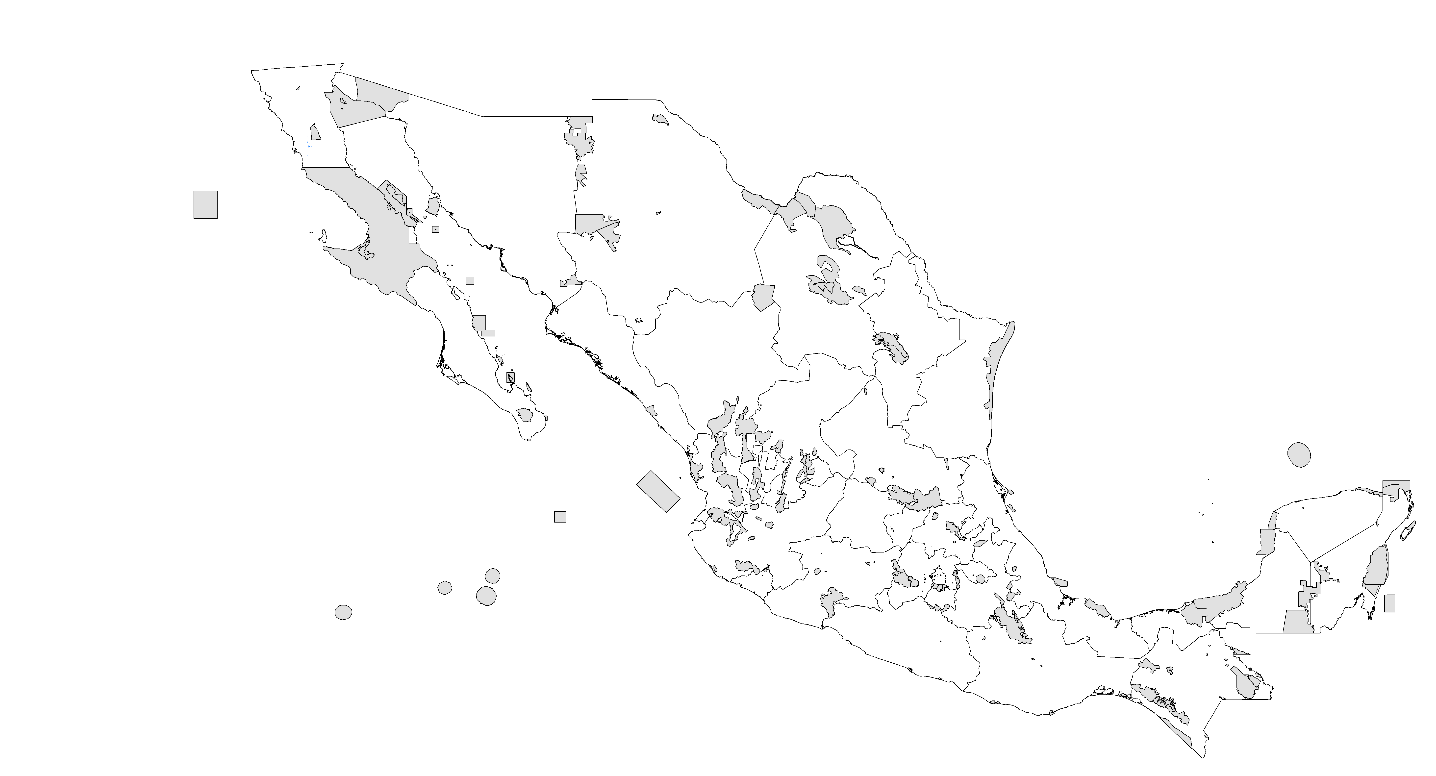
*

*Kochius sonorae*

1. Records


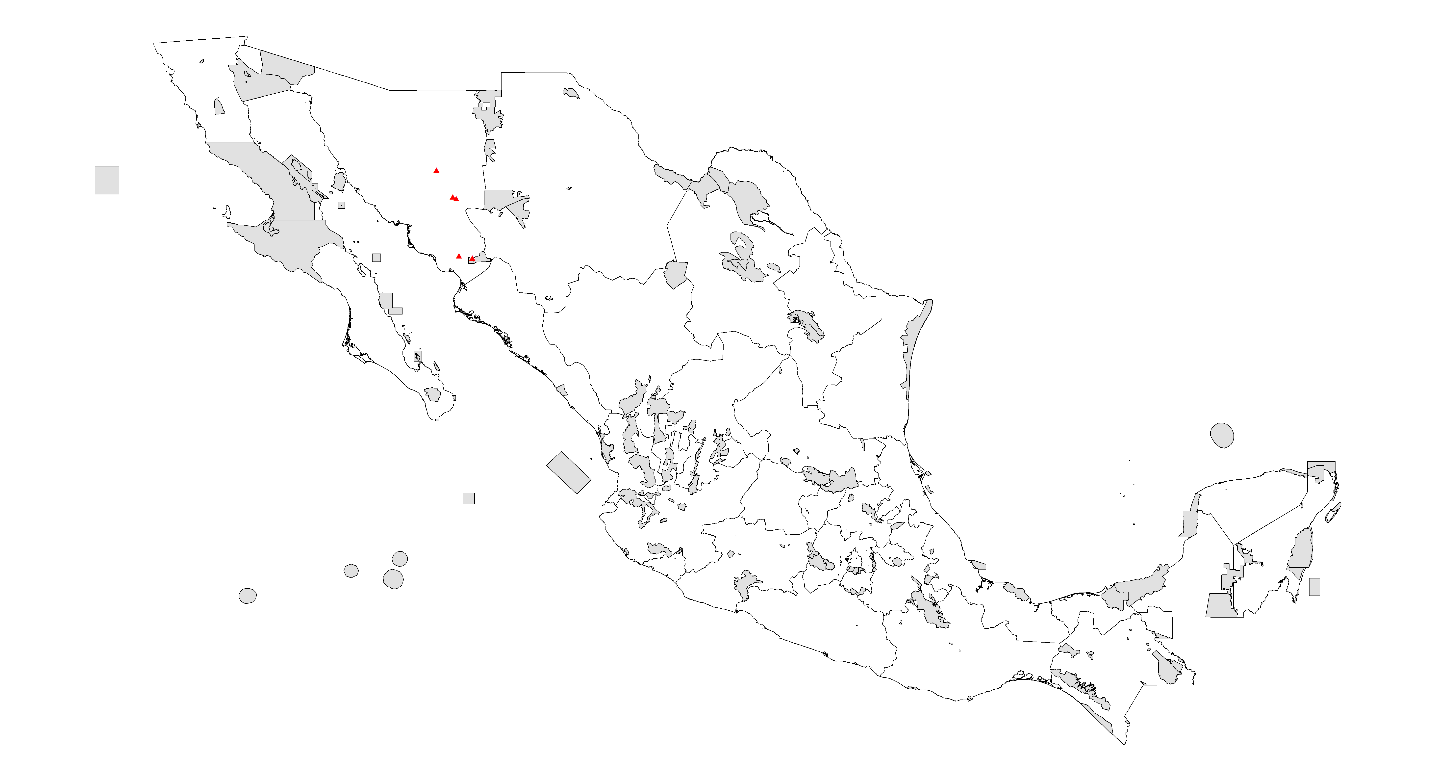


1. PDA under current climatic conditions


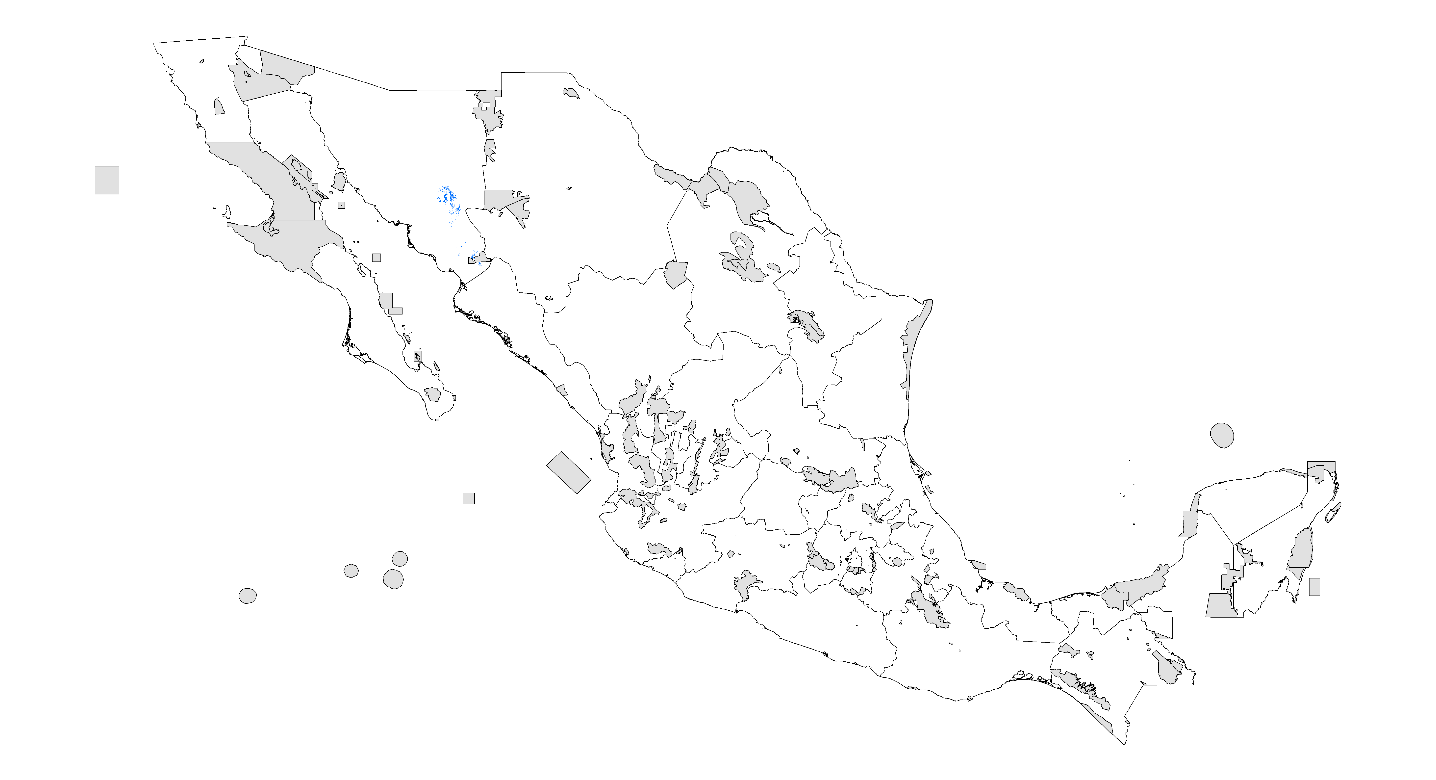


1. PDA 2020 RCP 4.5 W/m2


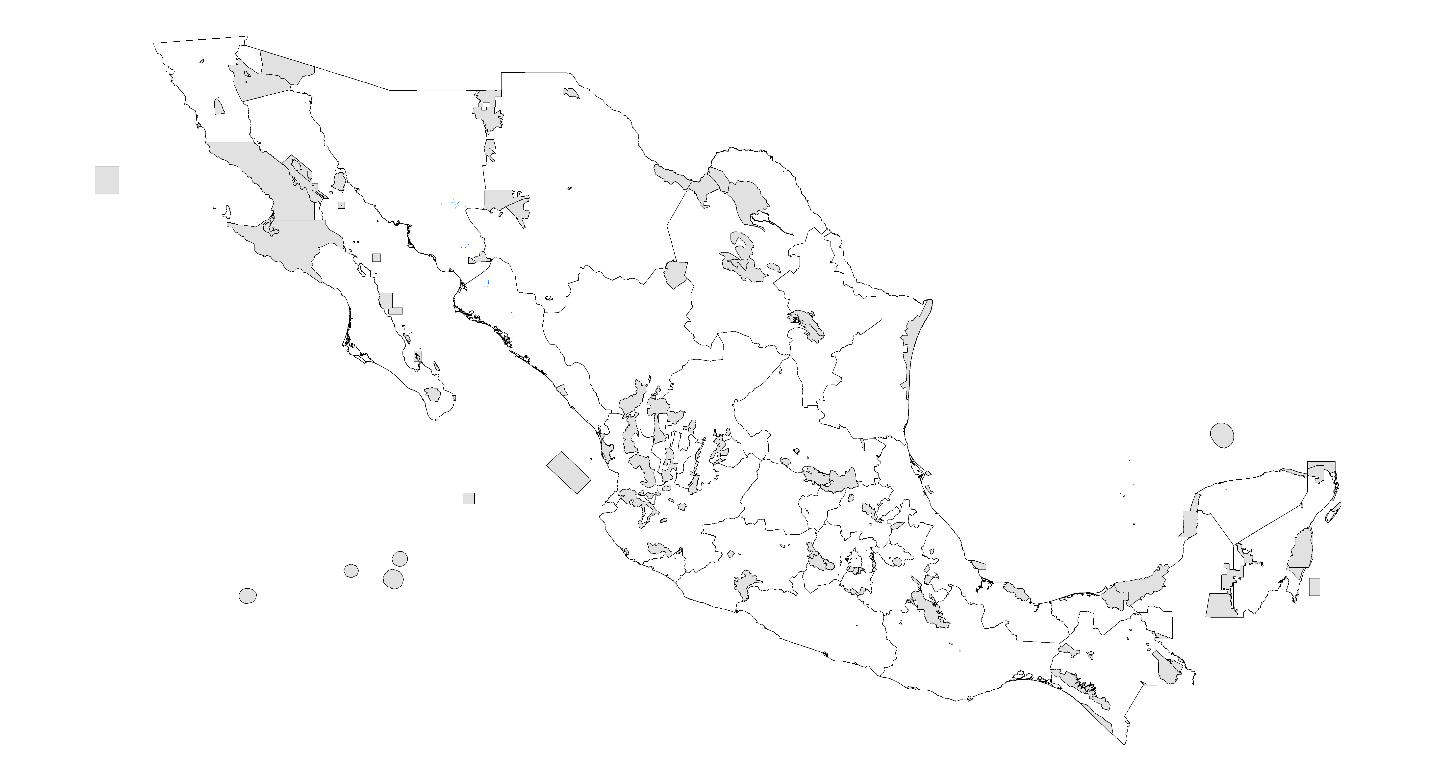


1. PDA 2020 RCP 8.5 W/m2


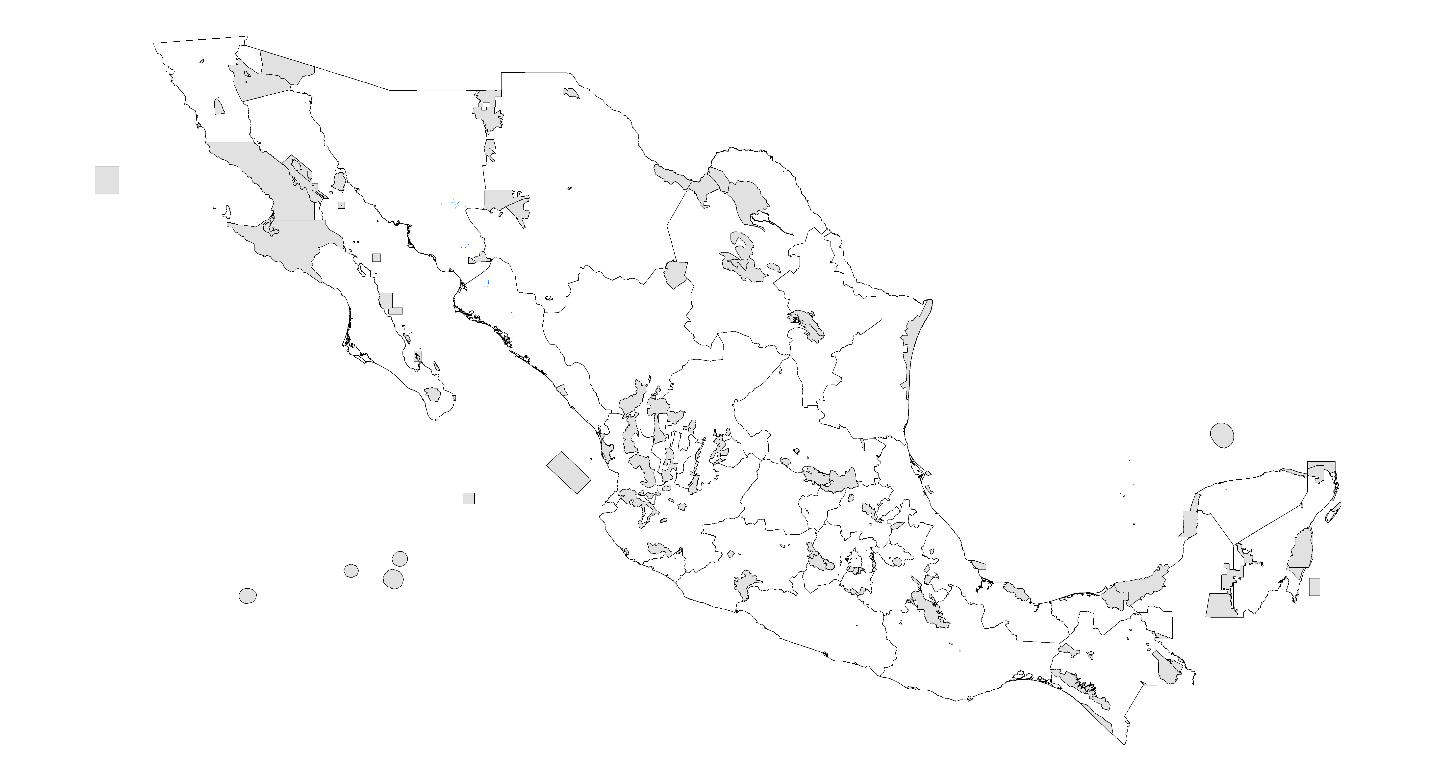


1. PDA 2080 RCP 4.5 W/m2


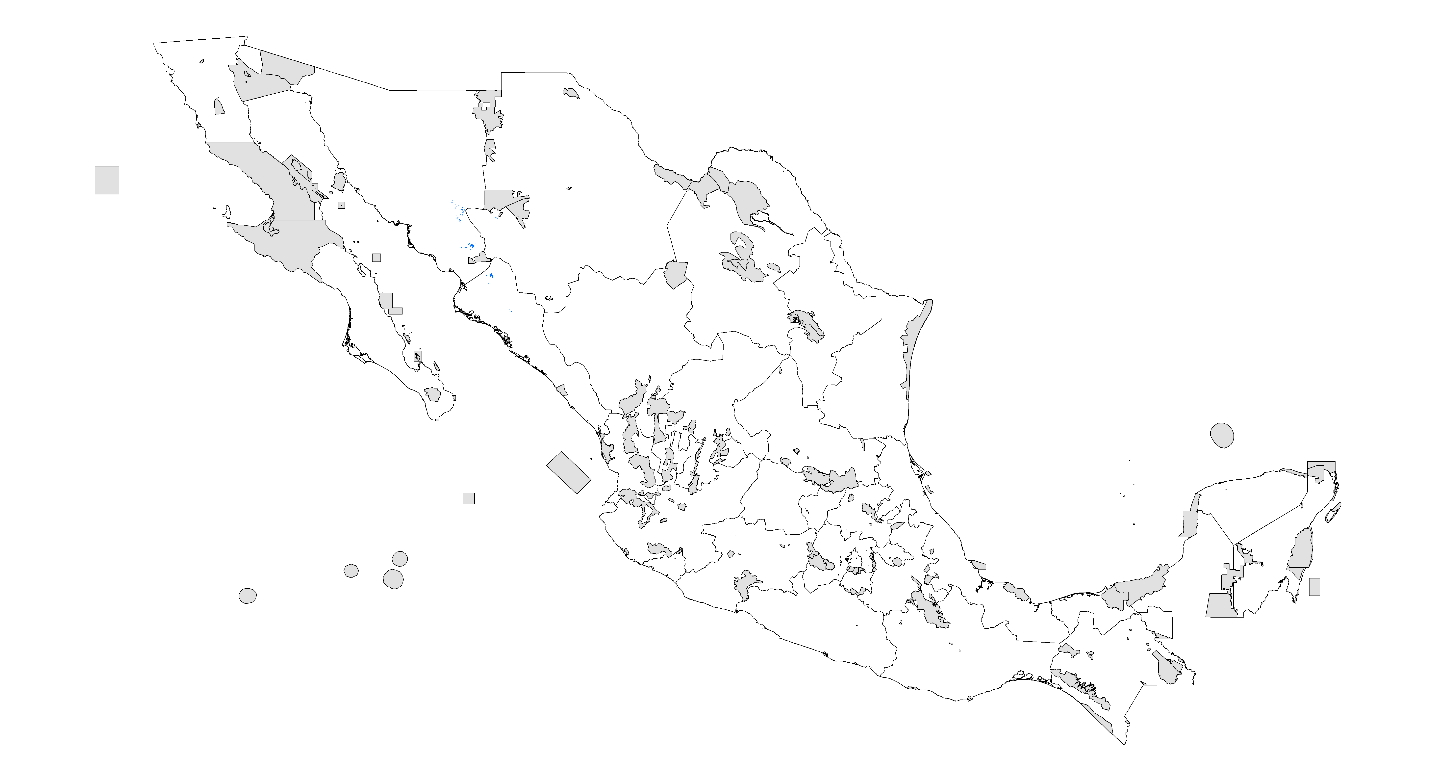


1. PDA 2080 RCP 8.5 W/m2

*
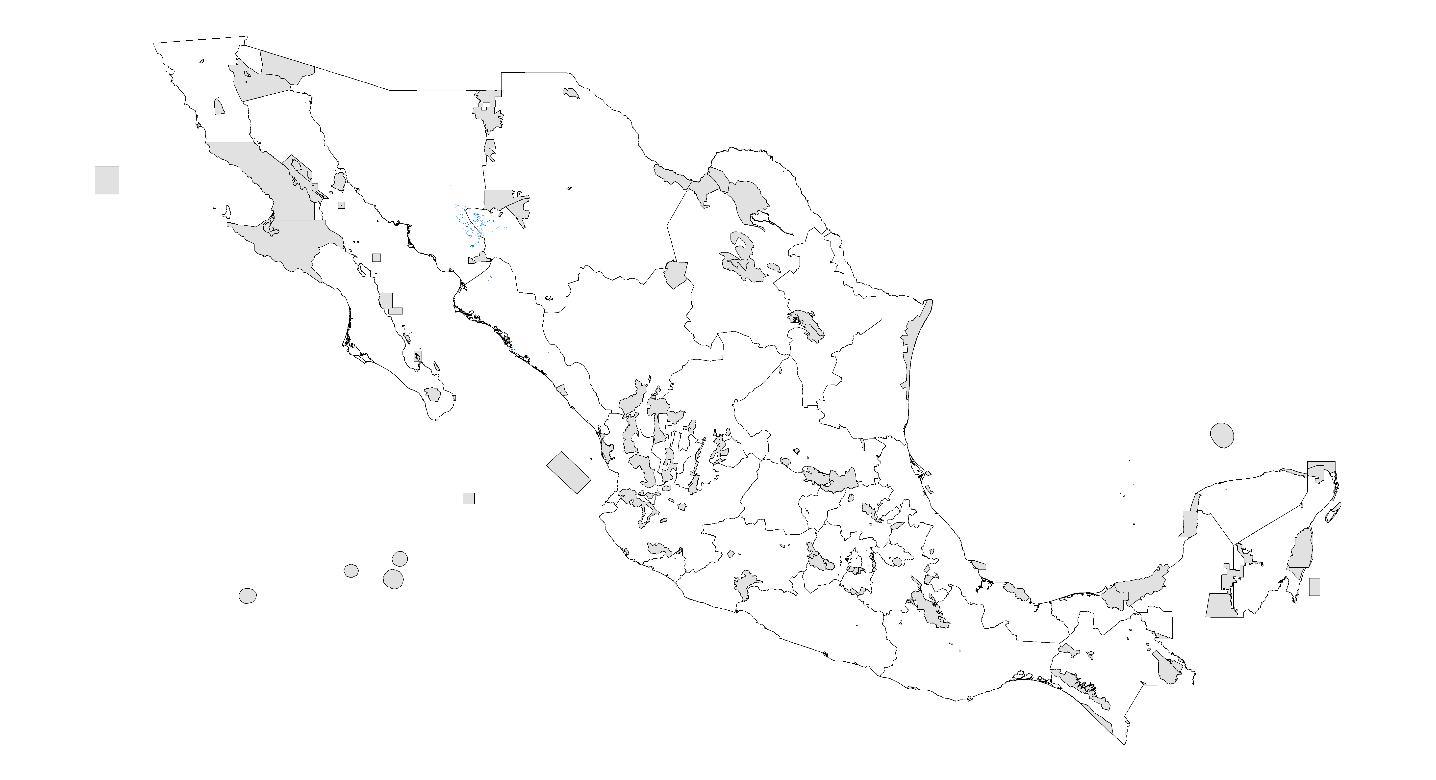
*

*Megacormus grubbsi*

1. Records


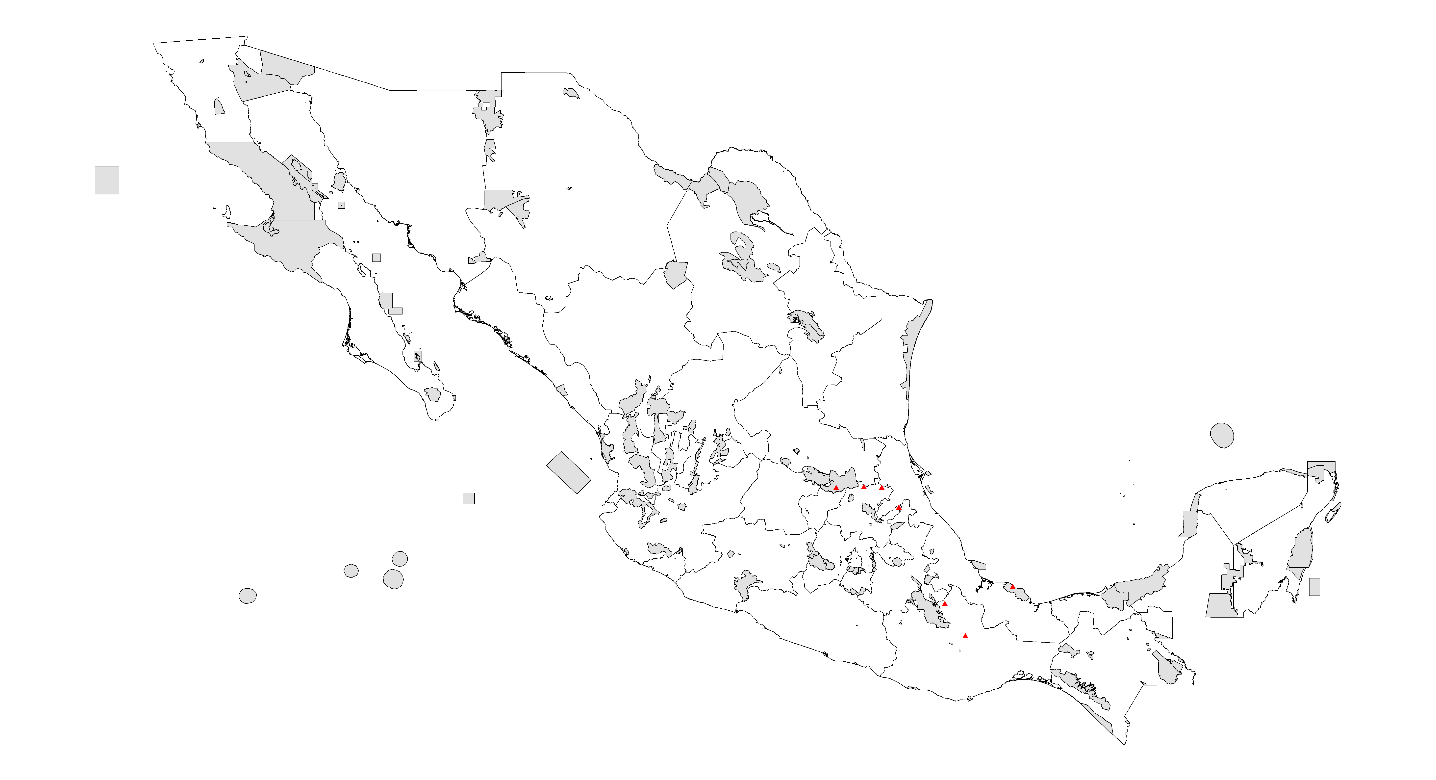


1. PDA under current climatic conditions


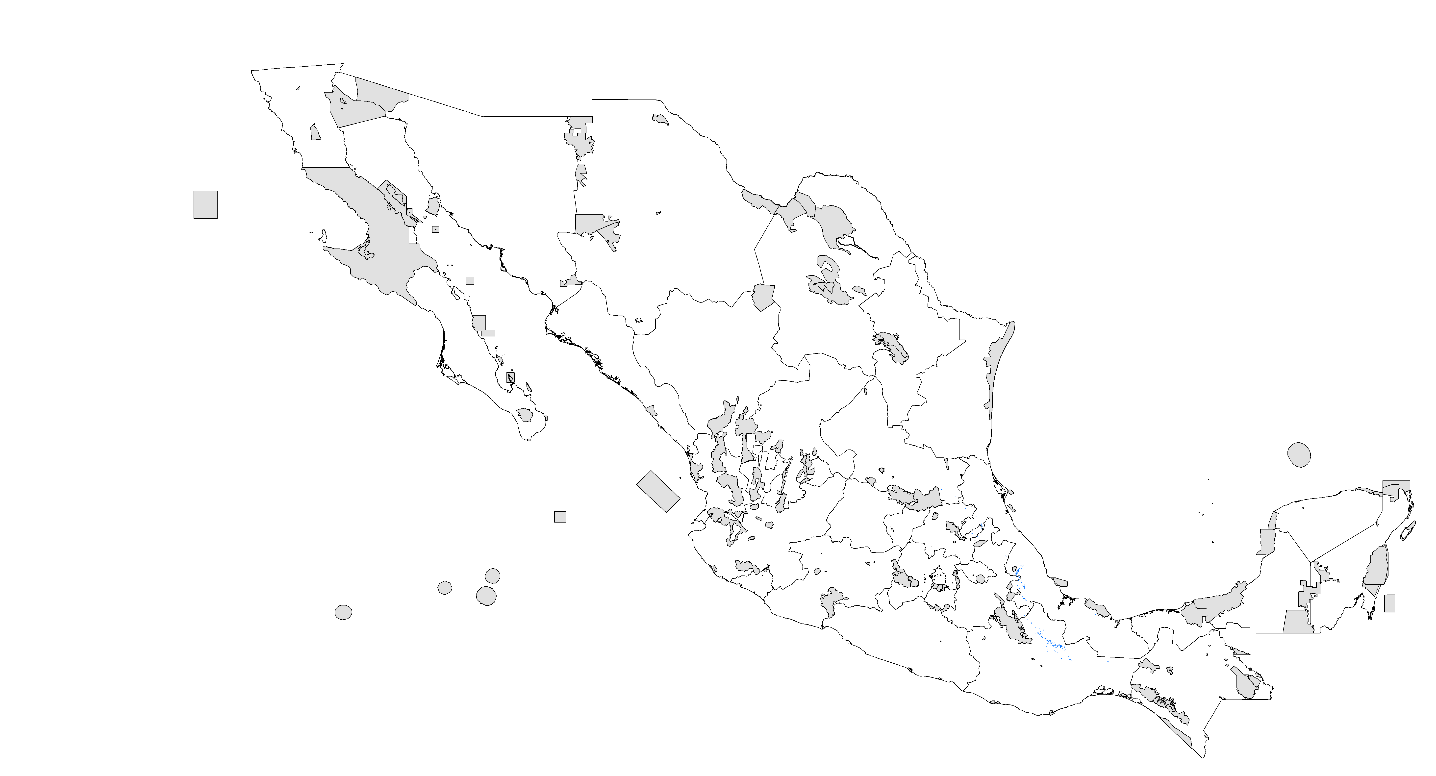


1. PDA 2020 RCP 4.5 W/m2


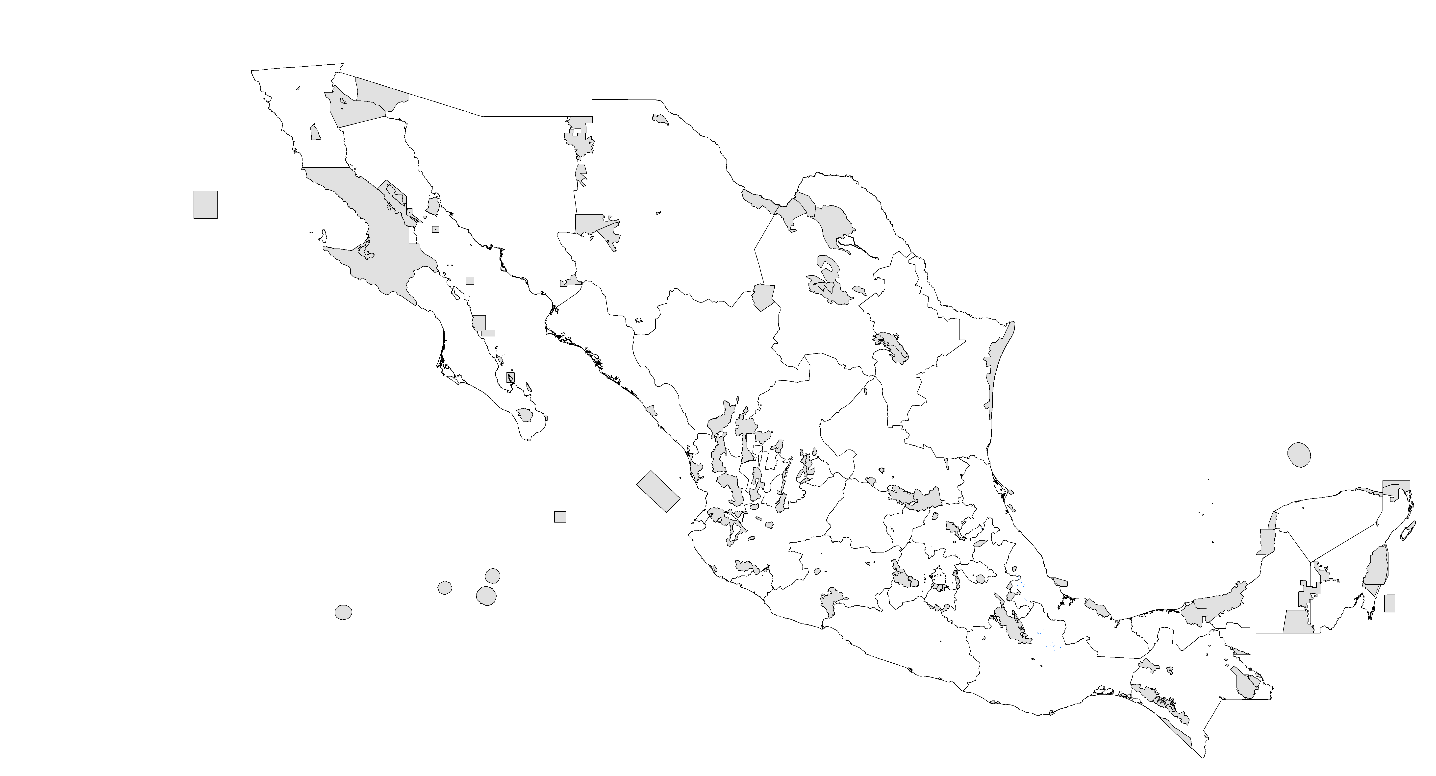


1. PDA 2020 RCP 8.5 W/m2


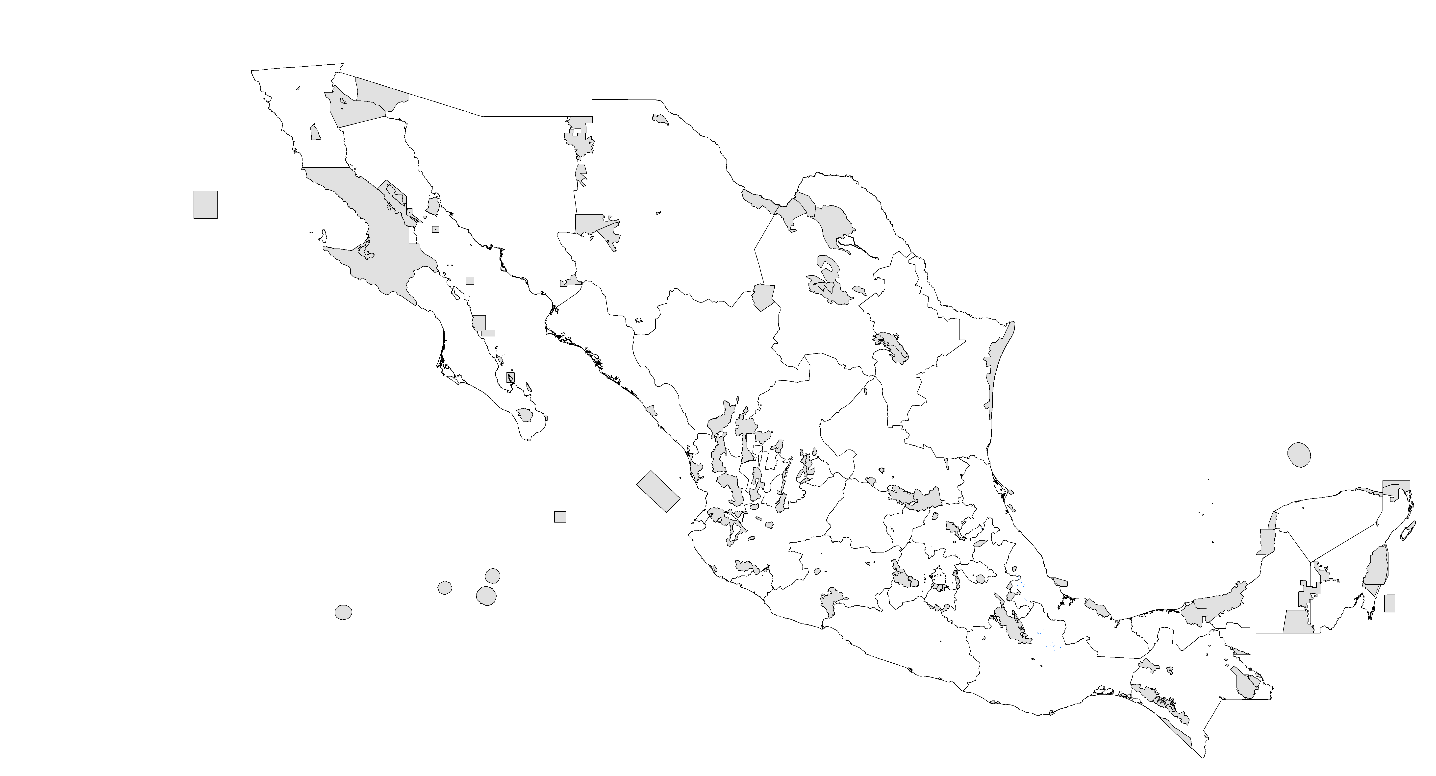


1. PDA 2080 RCP 4.5 W/m2


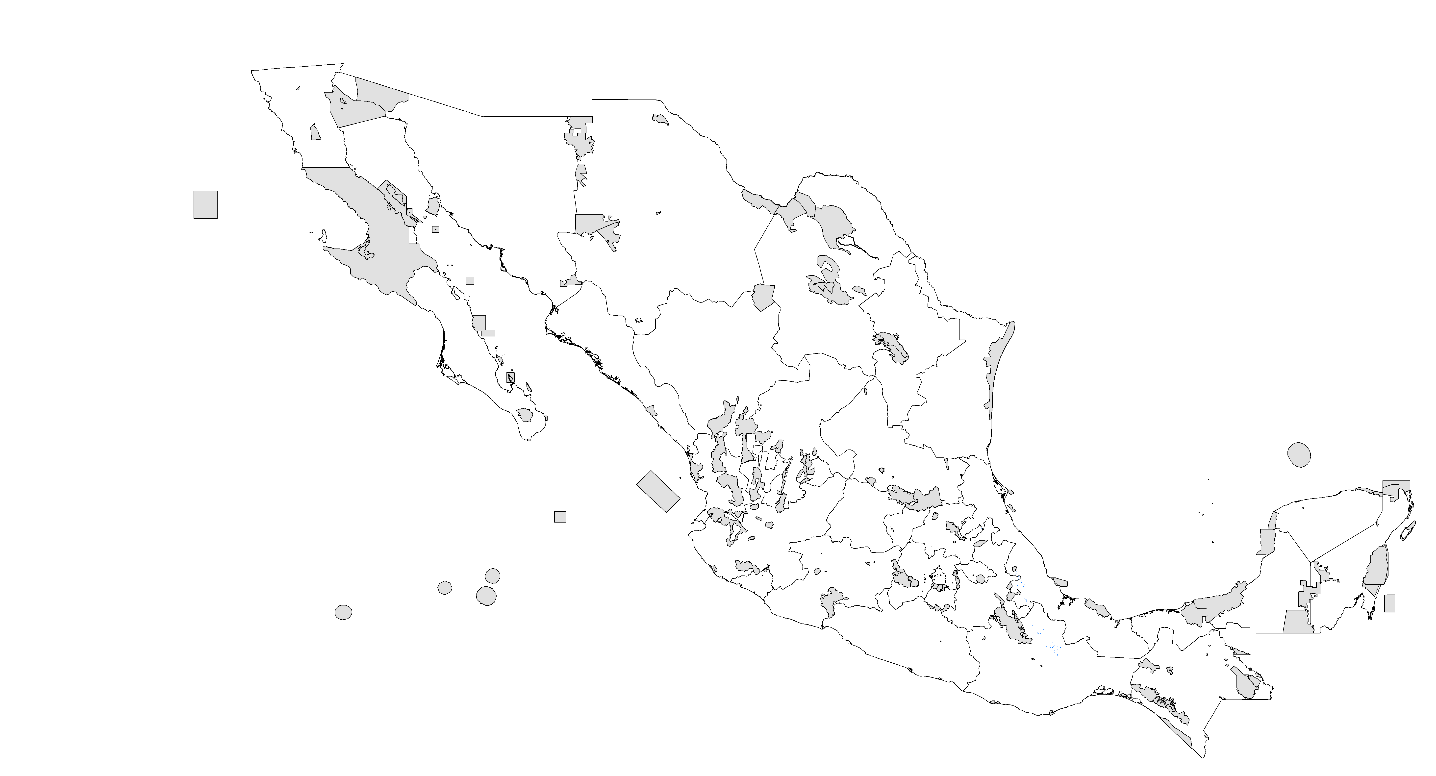


1. PDA 2080 RCP 8.5 W/m2

*
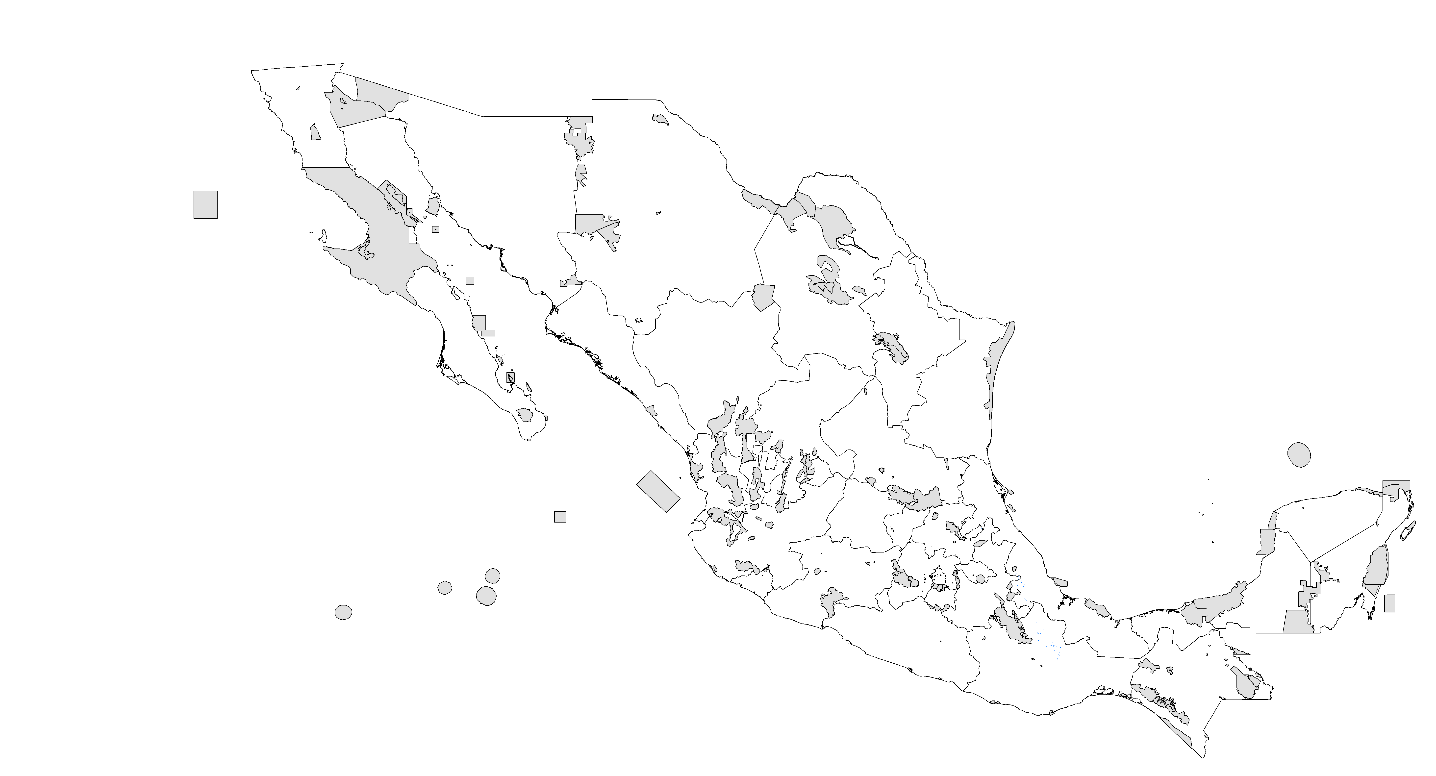
*

*Mesomexovis oaxaca*

1. Records


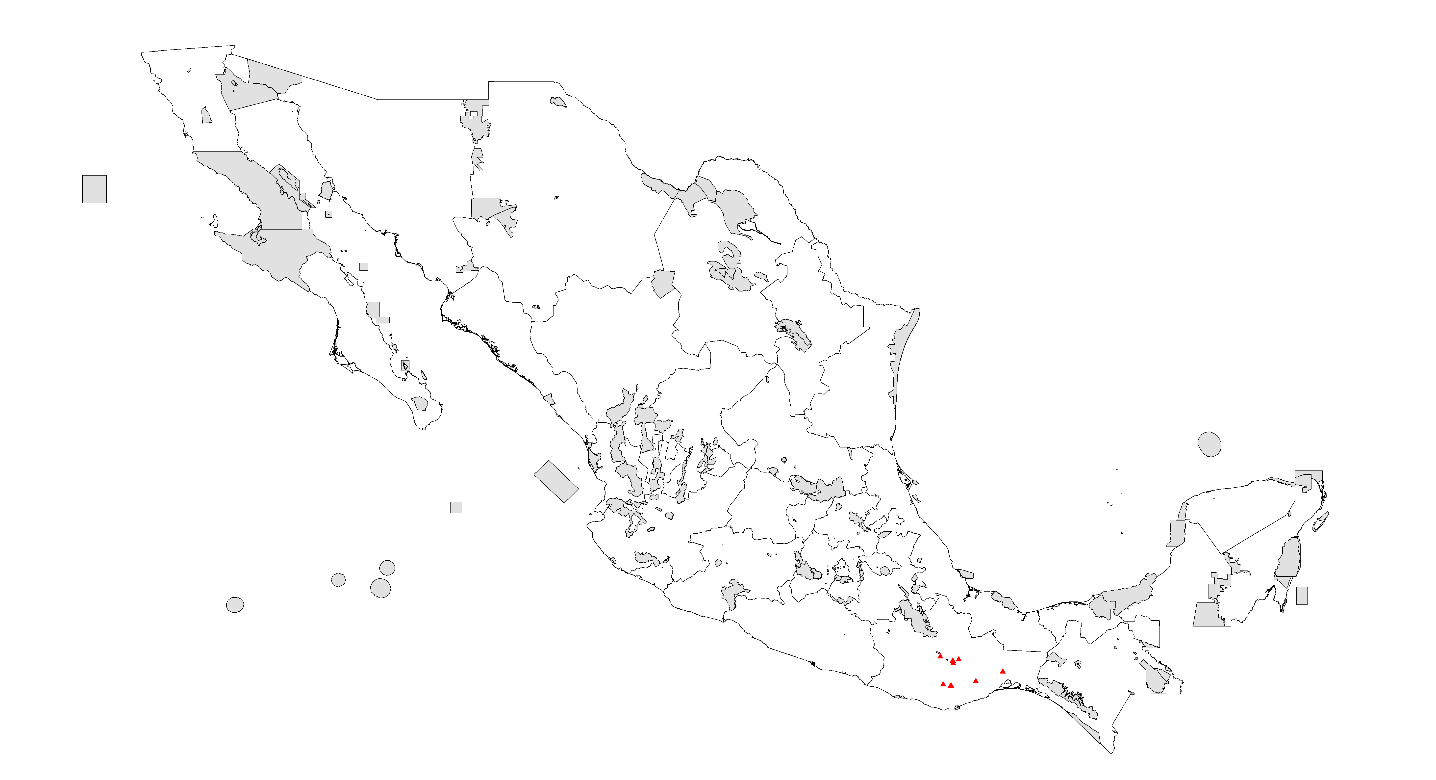


1. PDA under current climatic conditions


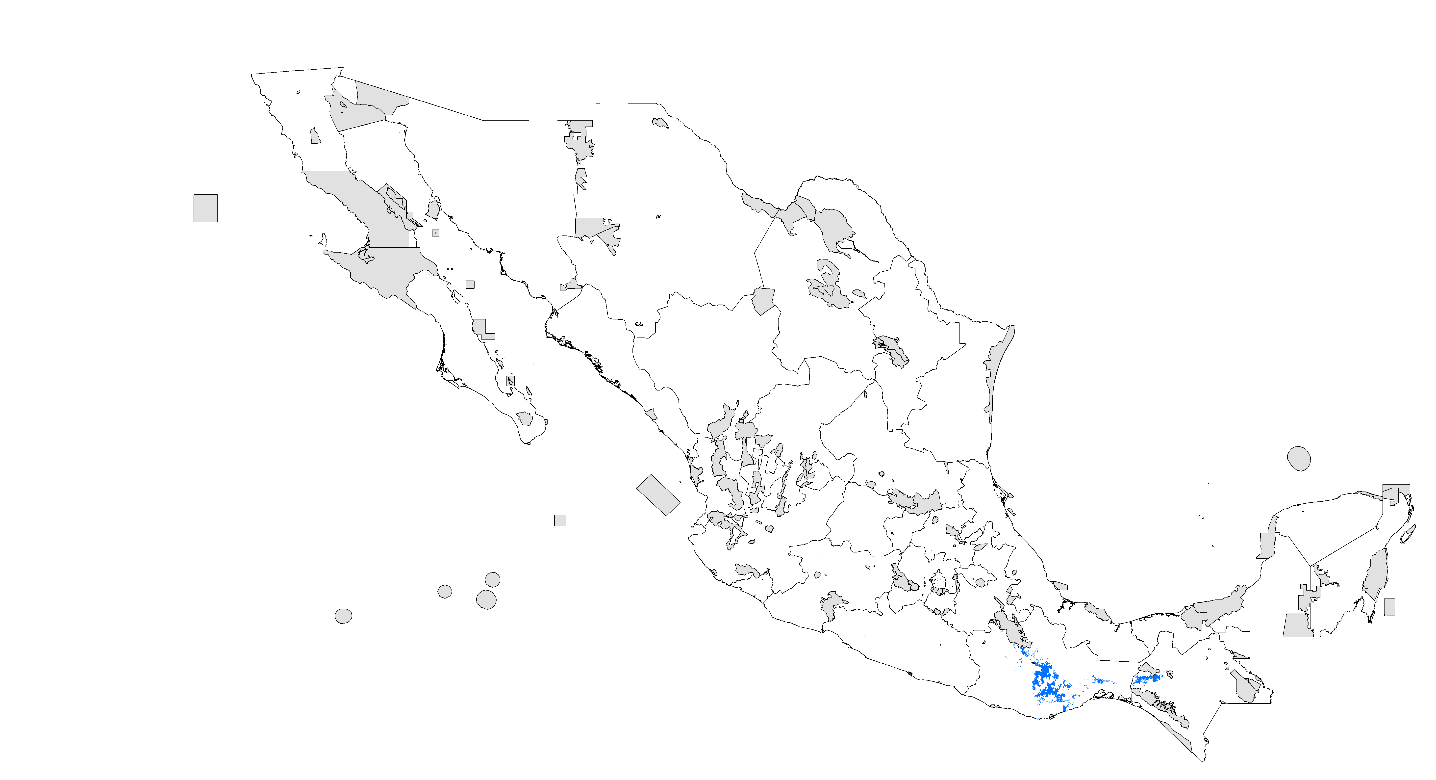


1. PDA 2020 RCP 4.5 W/m2


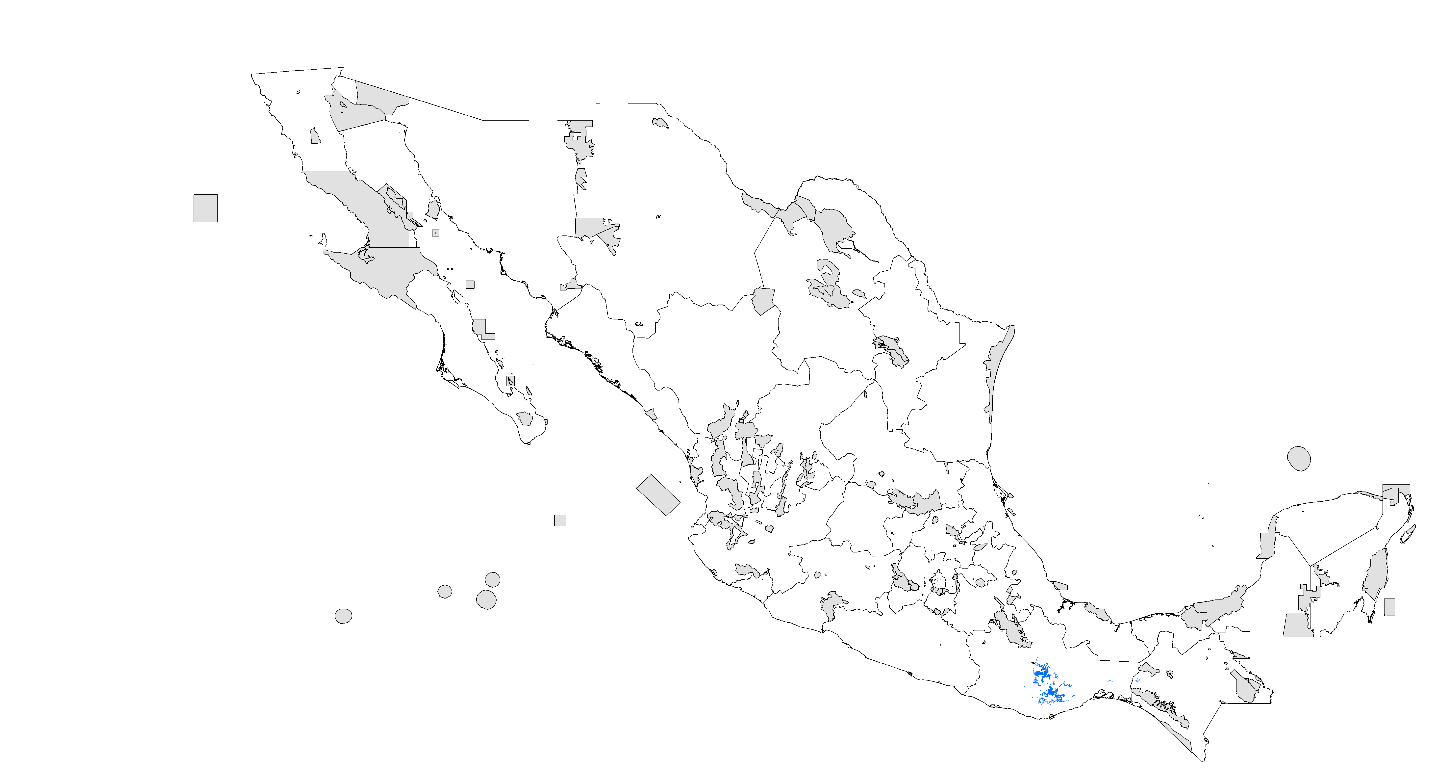


1. PDA 2020 RCP 8.5 W/m2


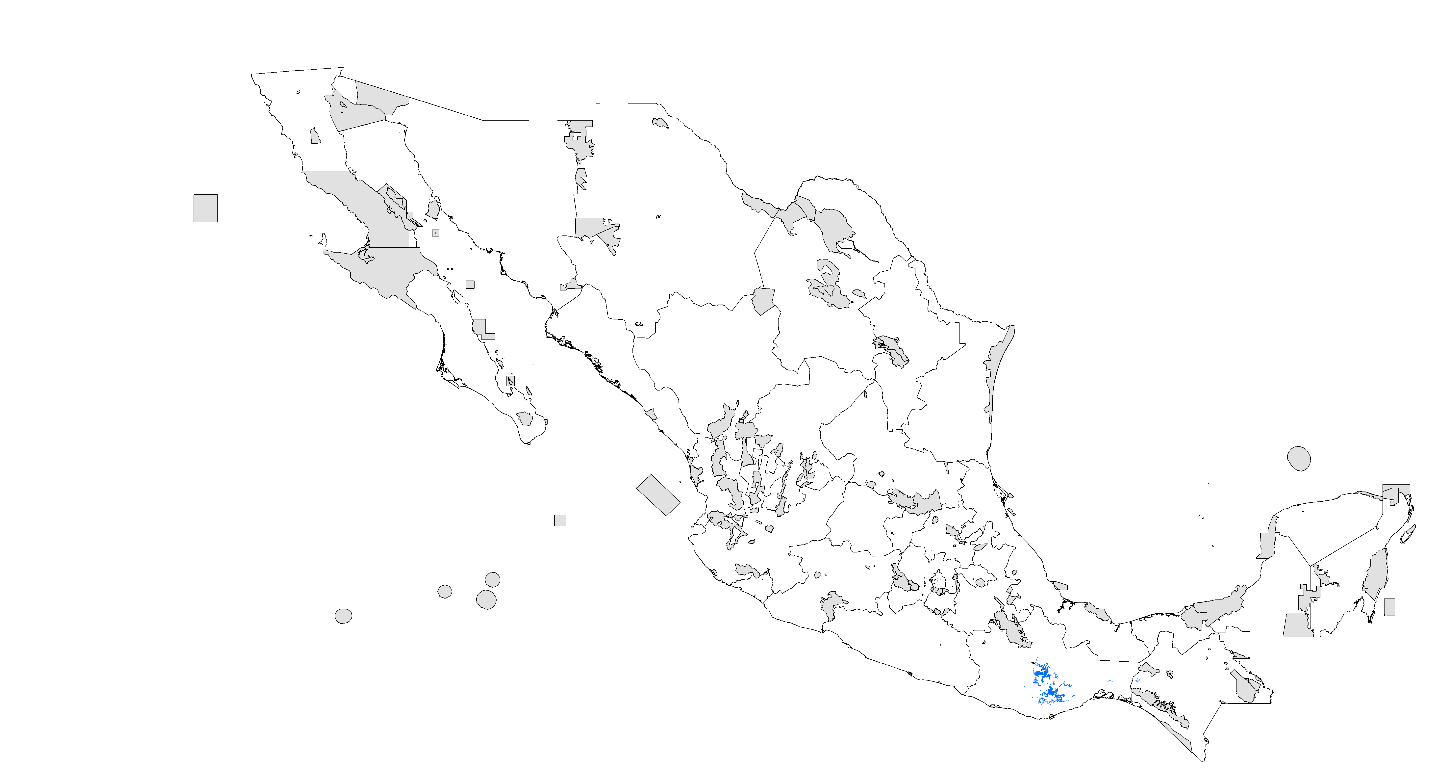


1. PDA 2080 RCP 4.5 W/m2


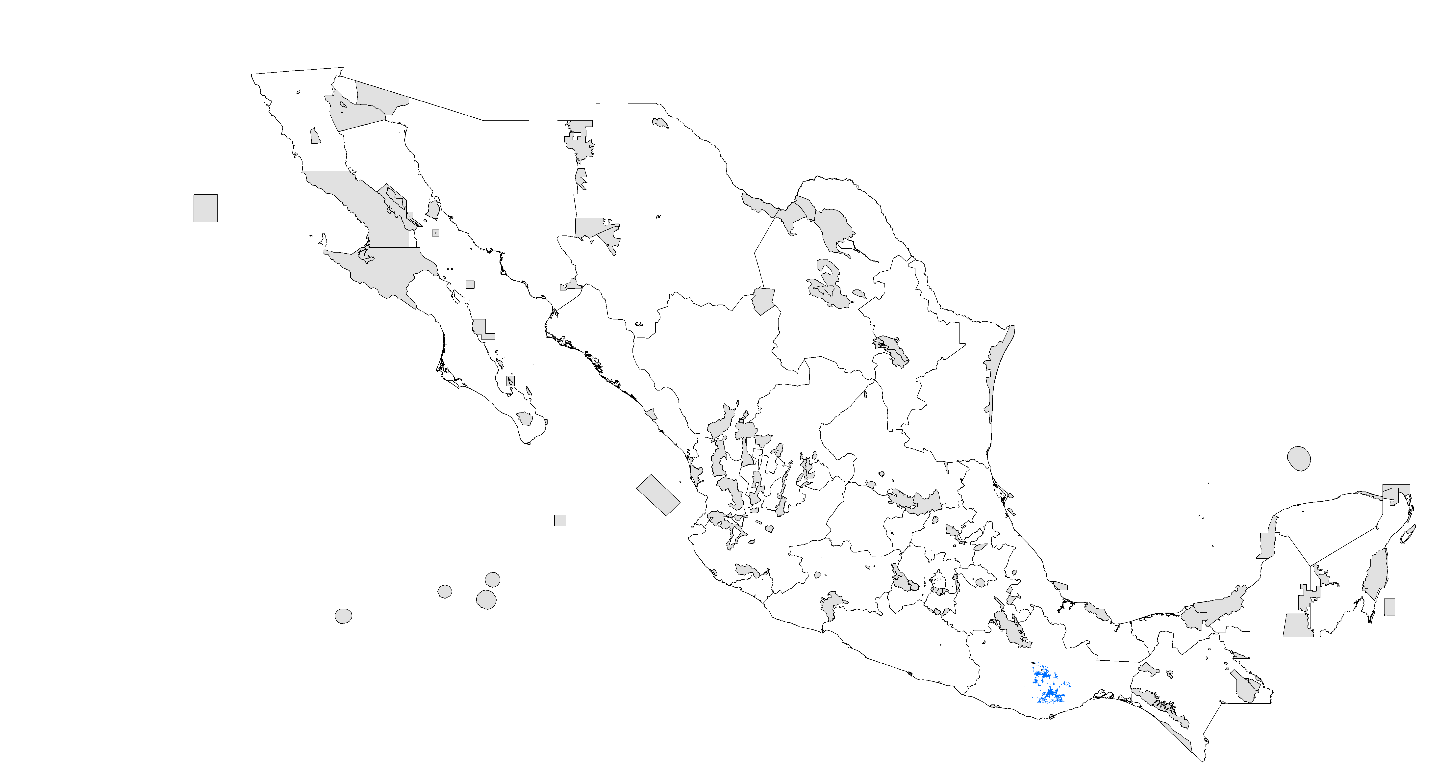


1. PDA 2080 RCP 8.5 W/m2

*
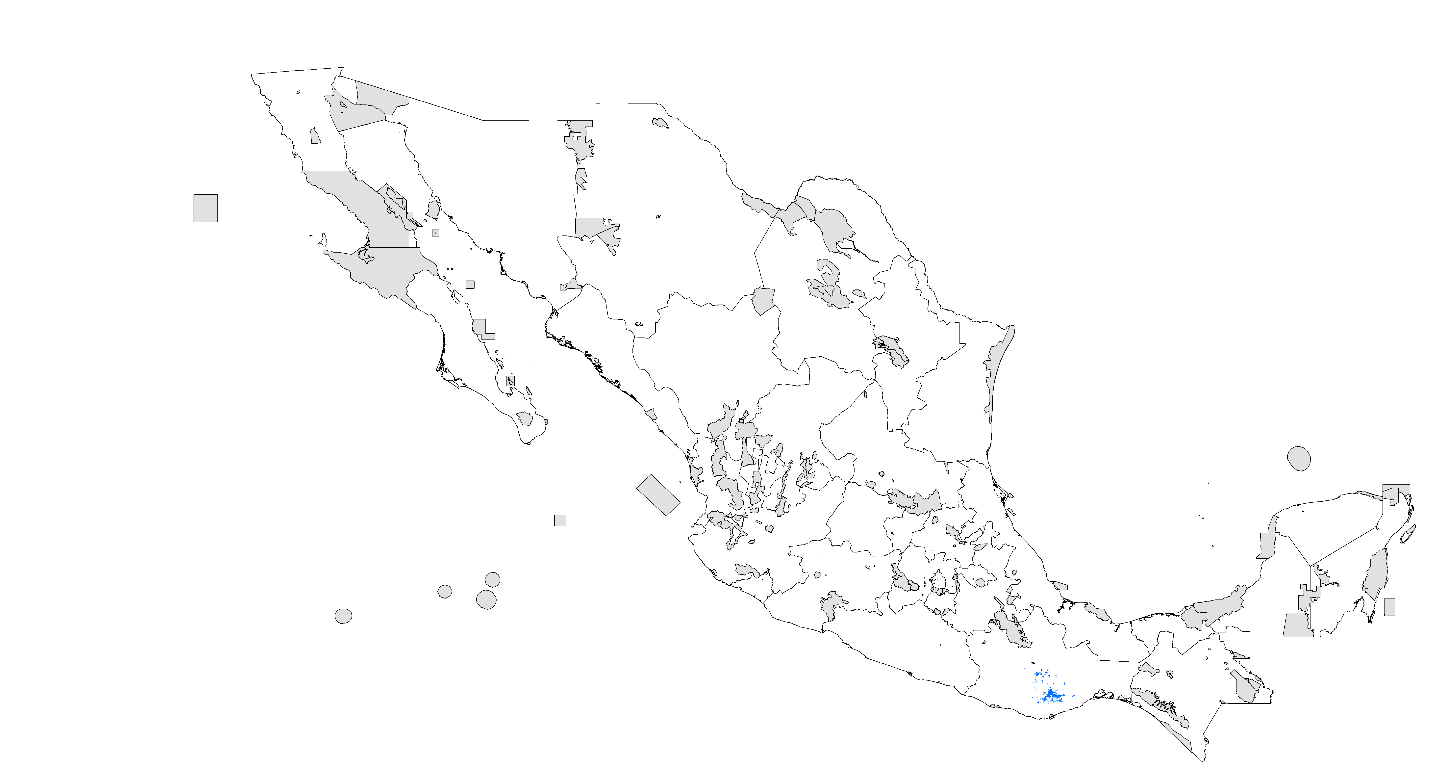
*

*Mesomexovis occidentalis*

1. Records


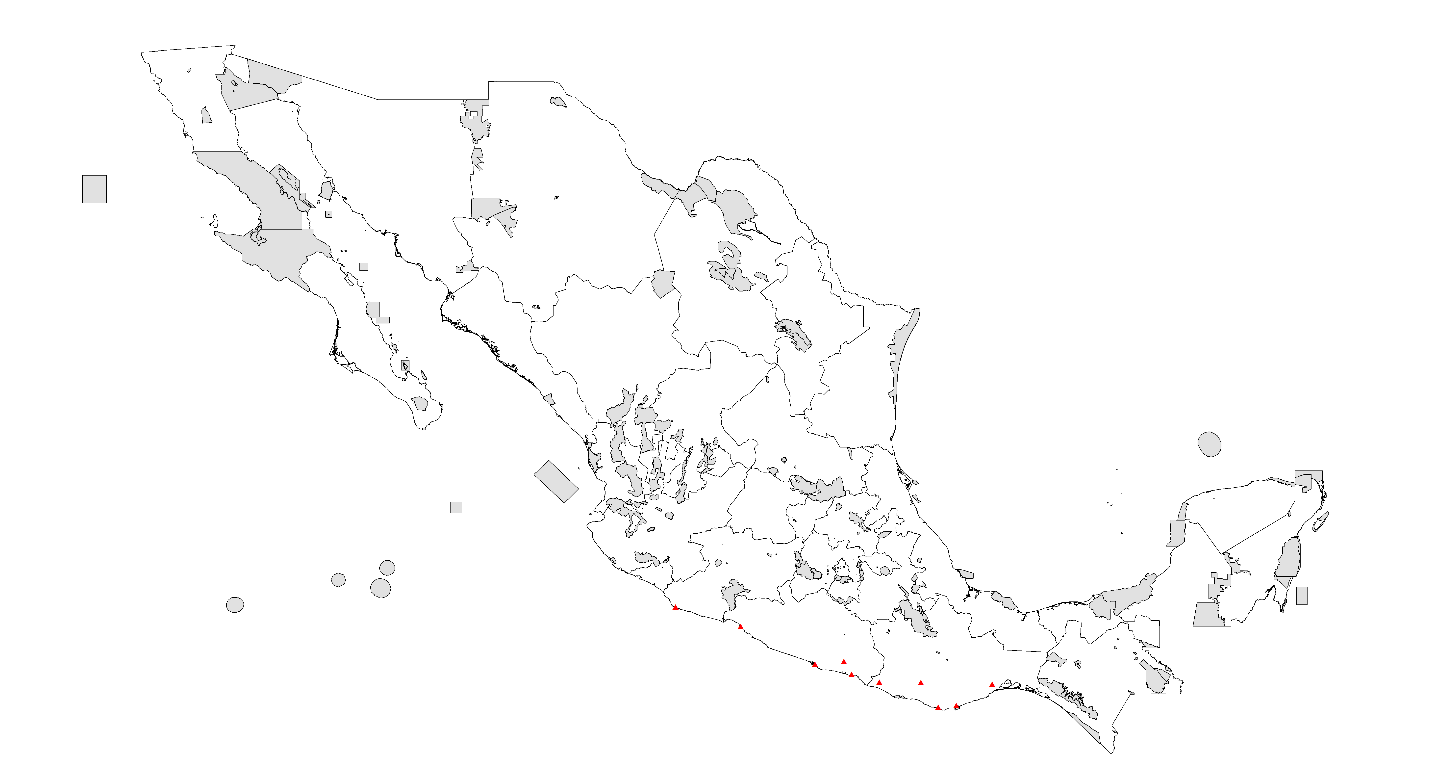


1. PDA under current climatic conditions


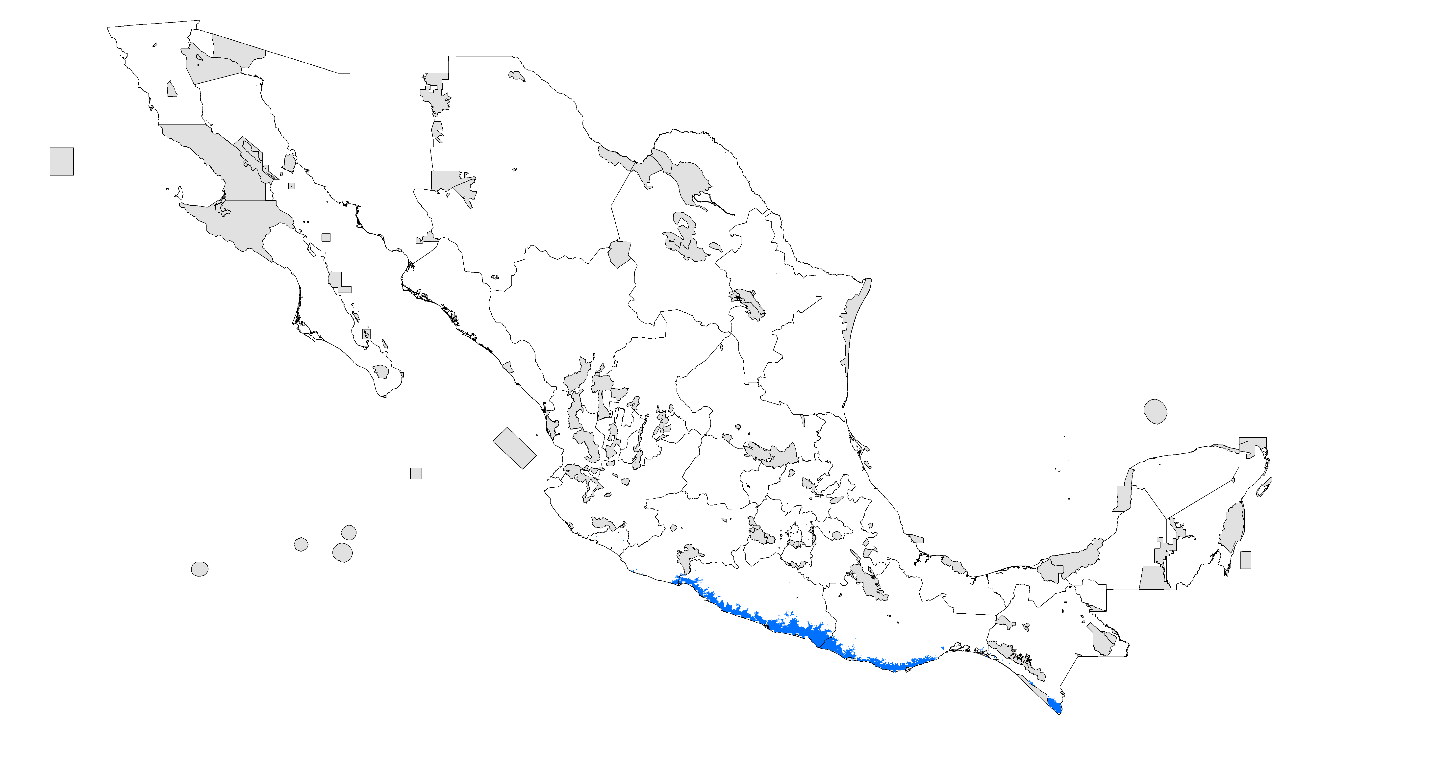


1. PDA 2020 RCP 4.5 W/m2


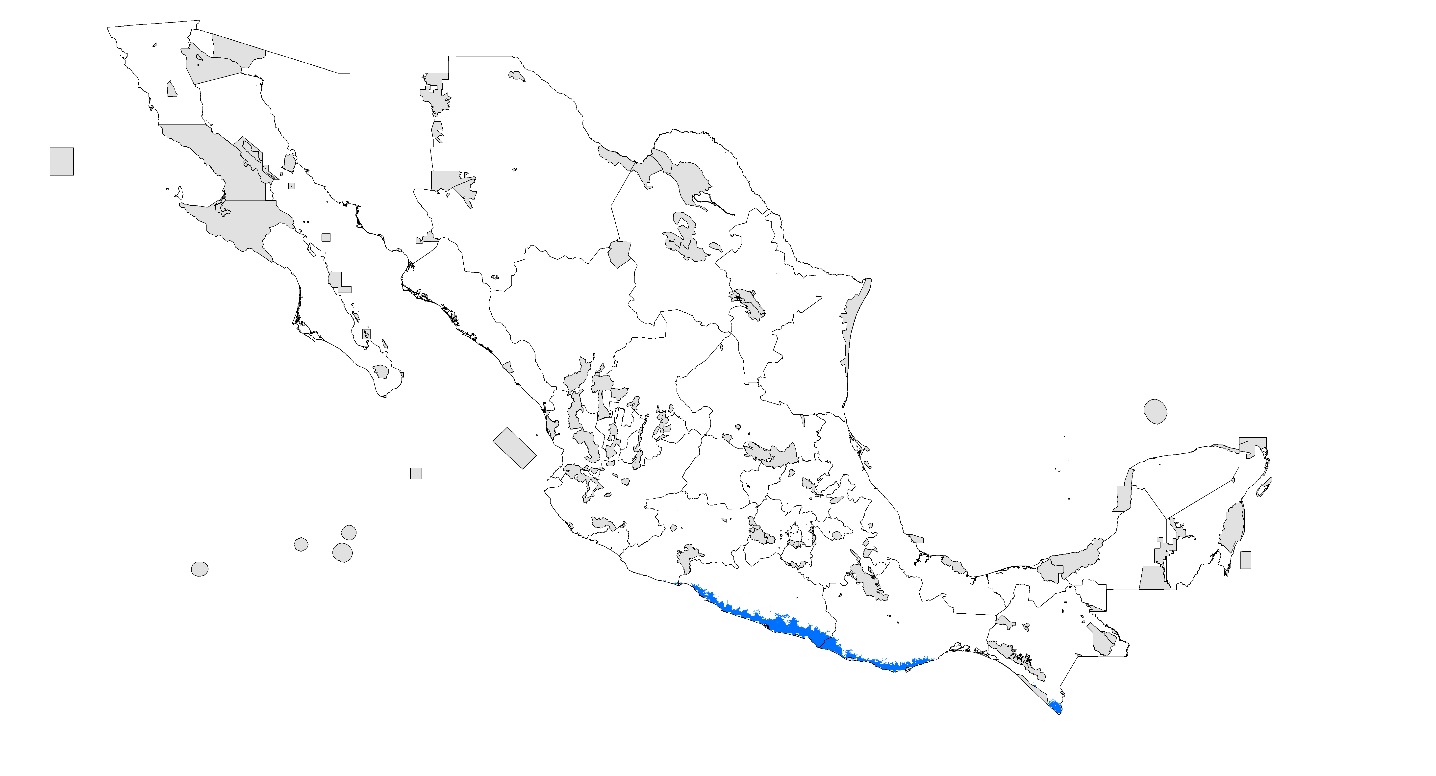


1. PDA 2020 RCP 8.5 W/m2


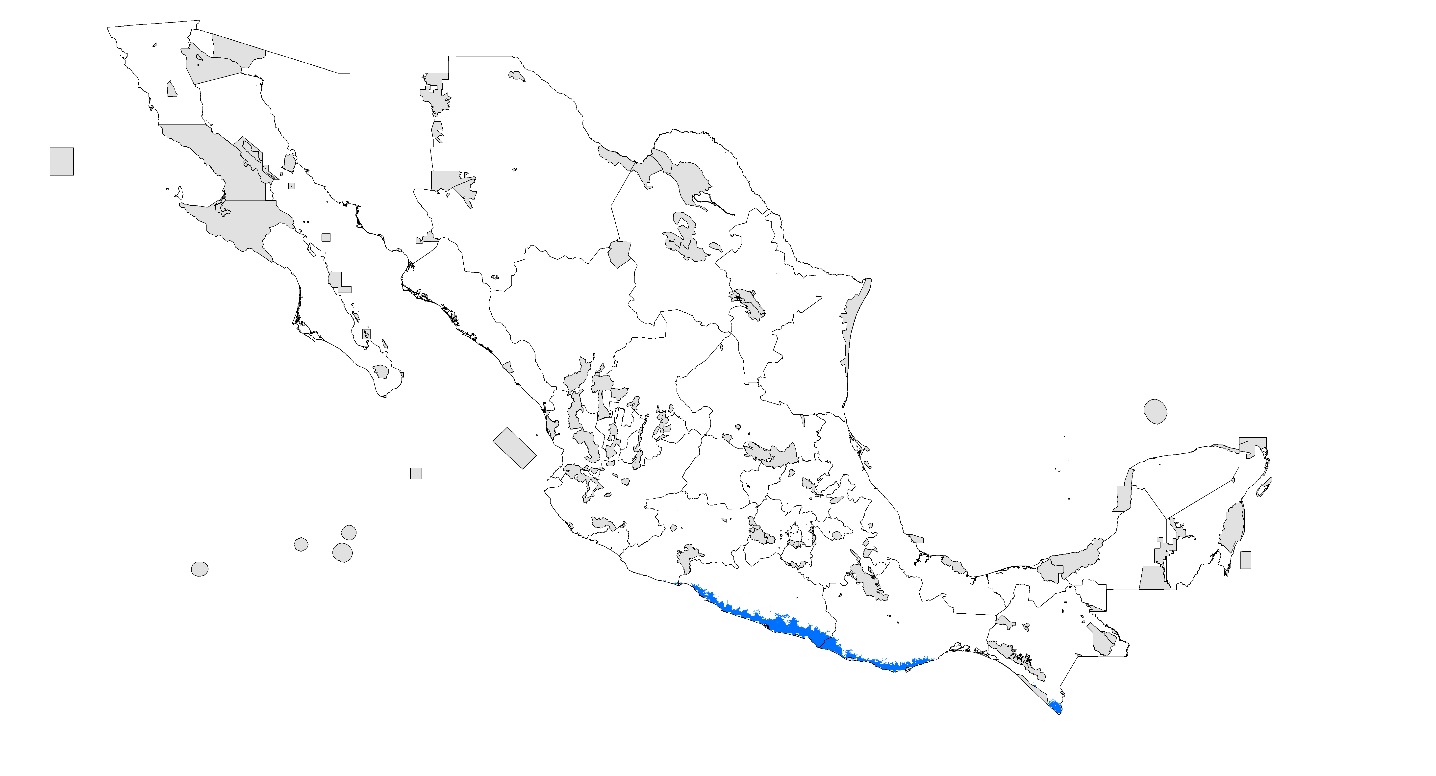


1. PDA 2080 RCP 4.5 W/m2


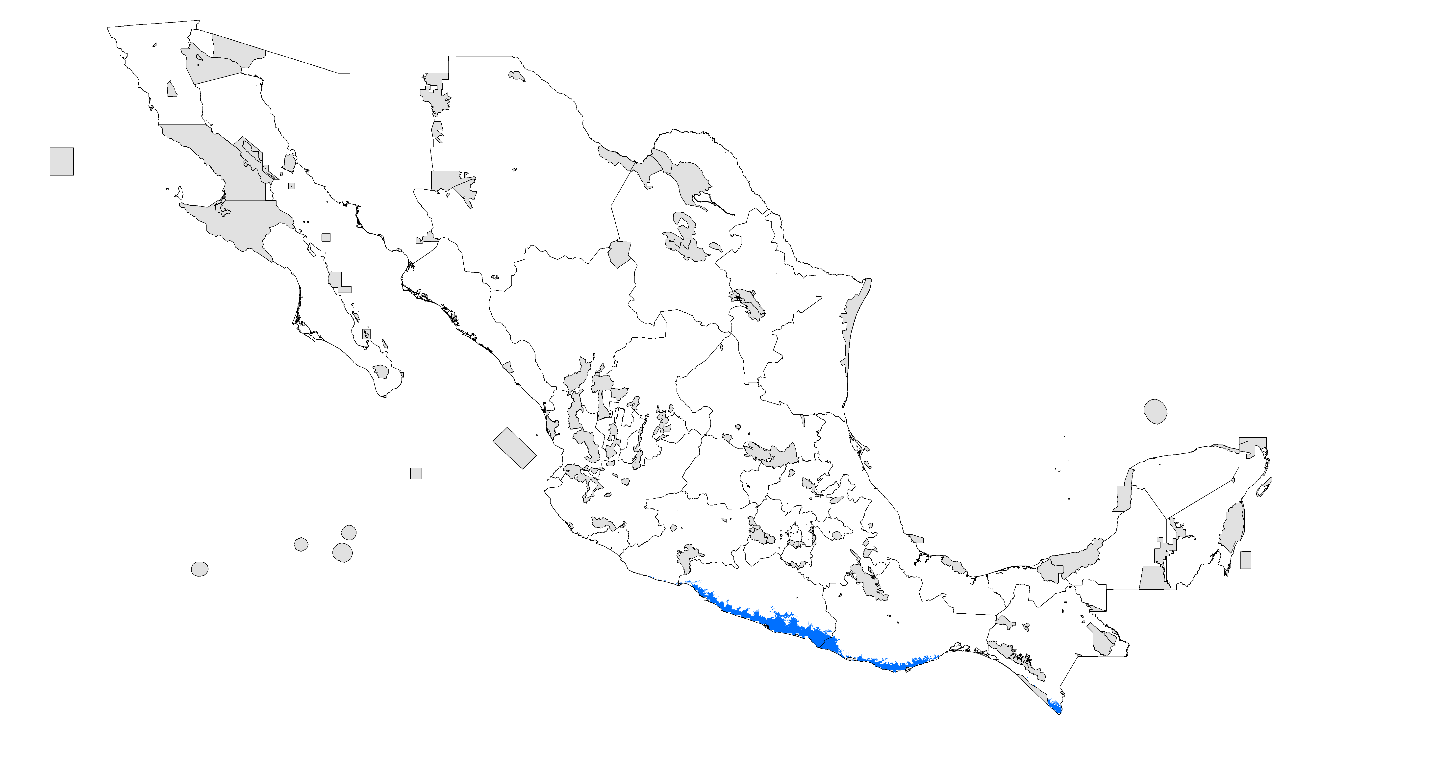


1. PDA 2080 RCP 8.5 W/m2

*
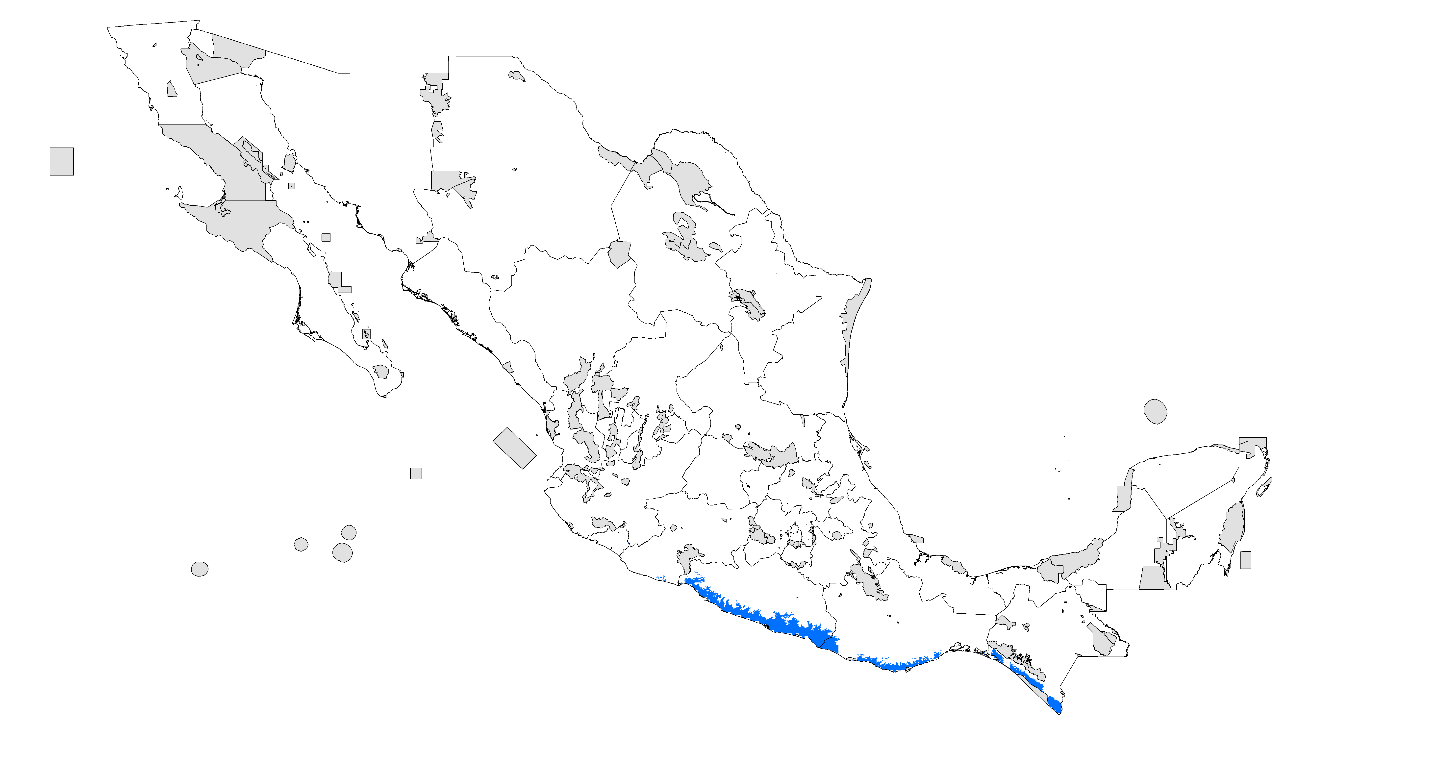
*

*Mesomexovis subscritatus*

1. Records


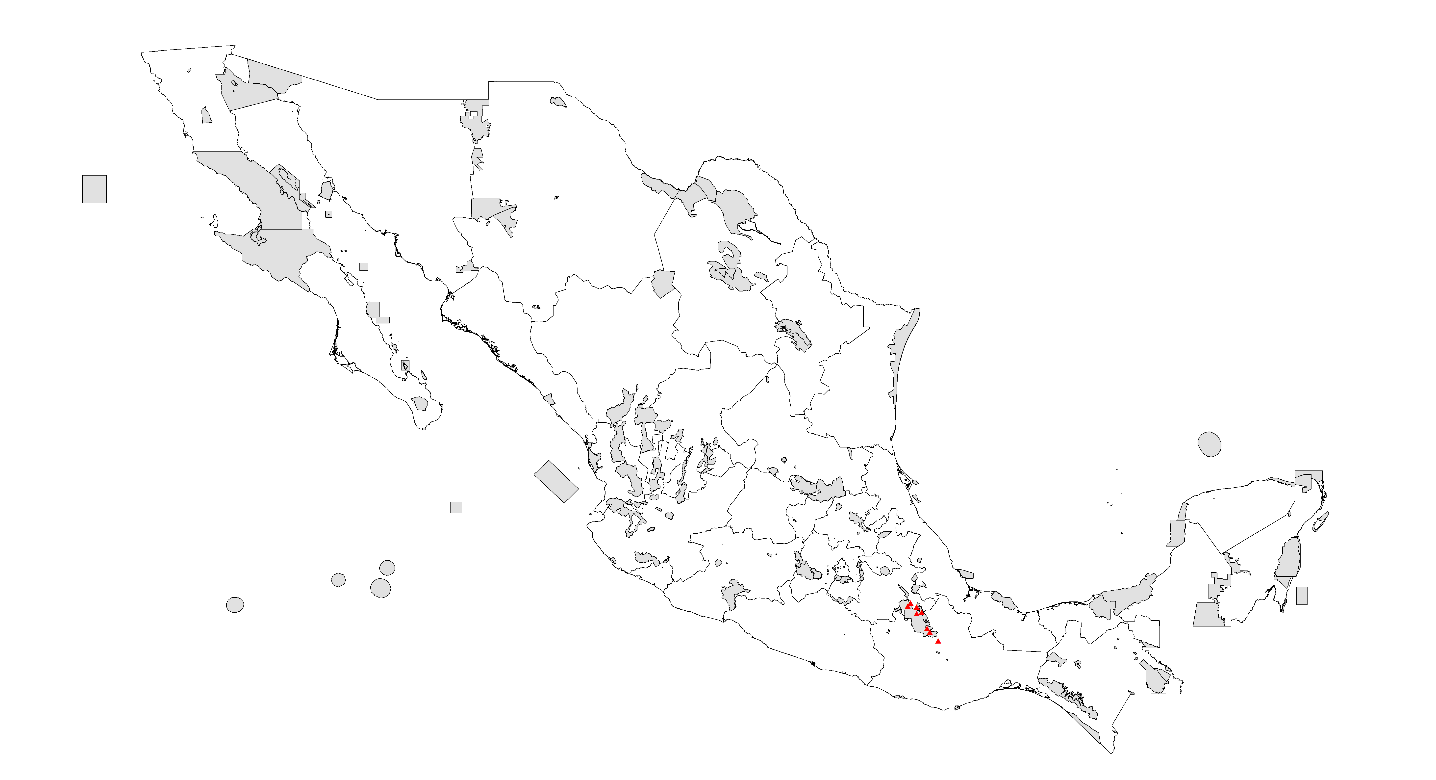


1. PDA under current climatic conditions


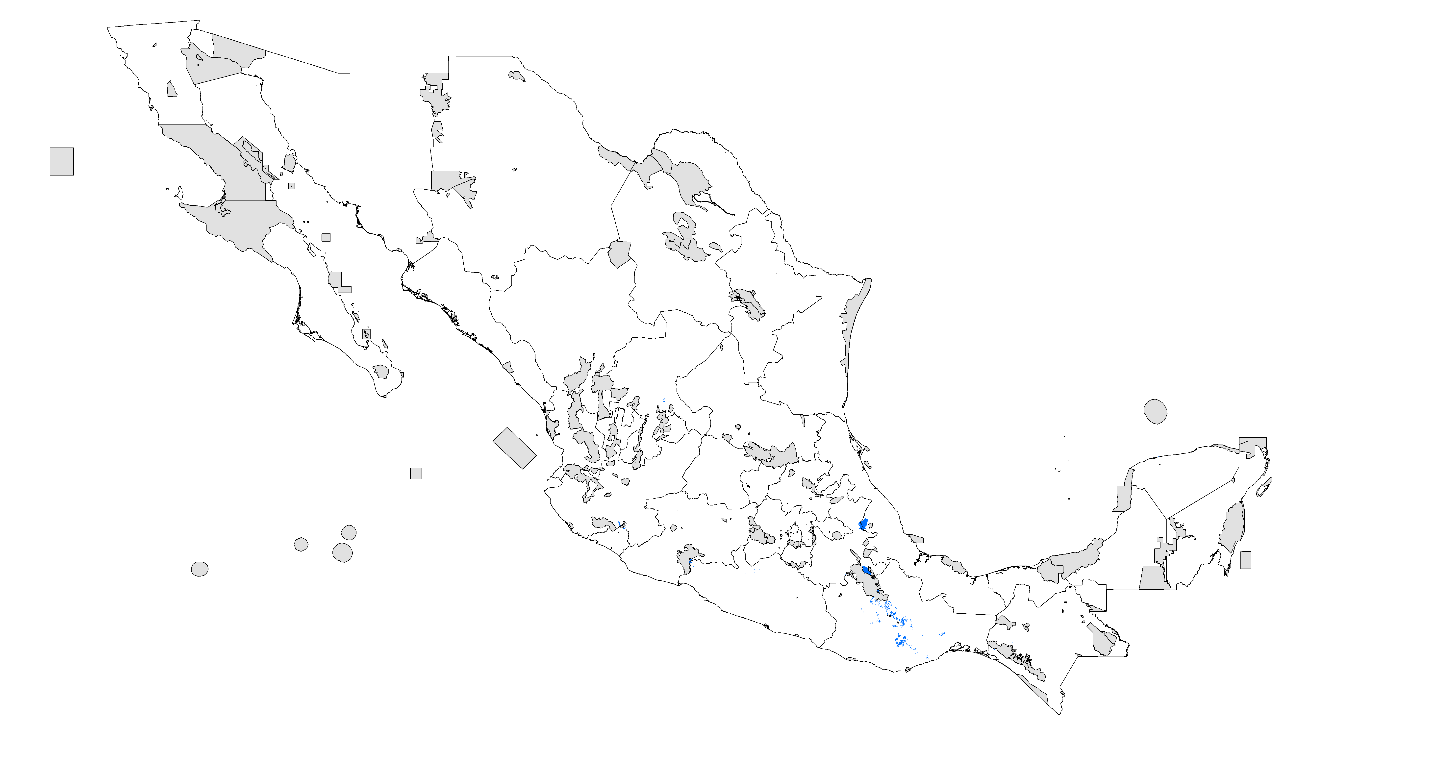


1. PDA 2020 RCP 4.5 W/m2


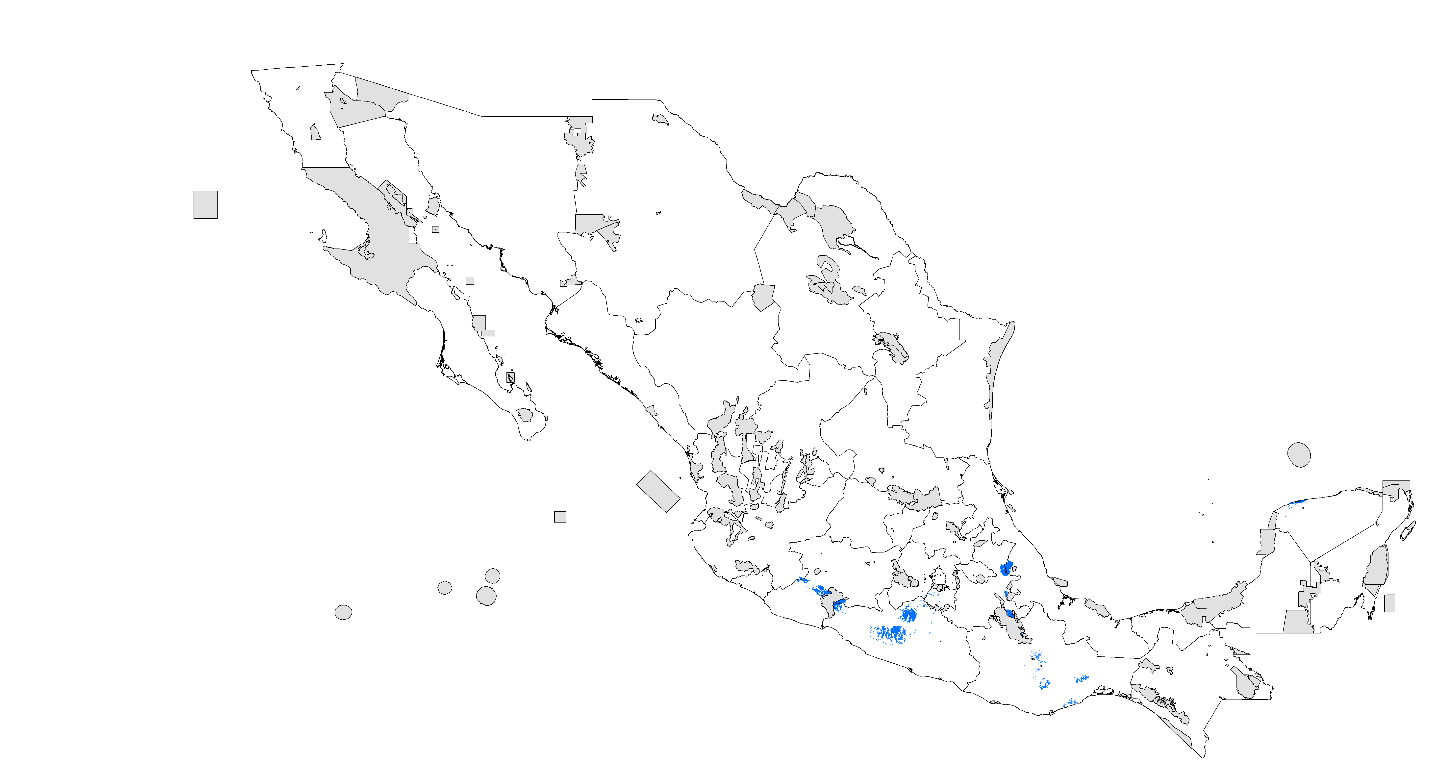


1. PDA 2020 RCP 8.5 W/m2


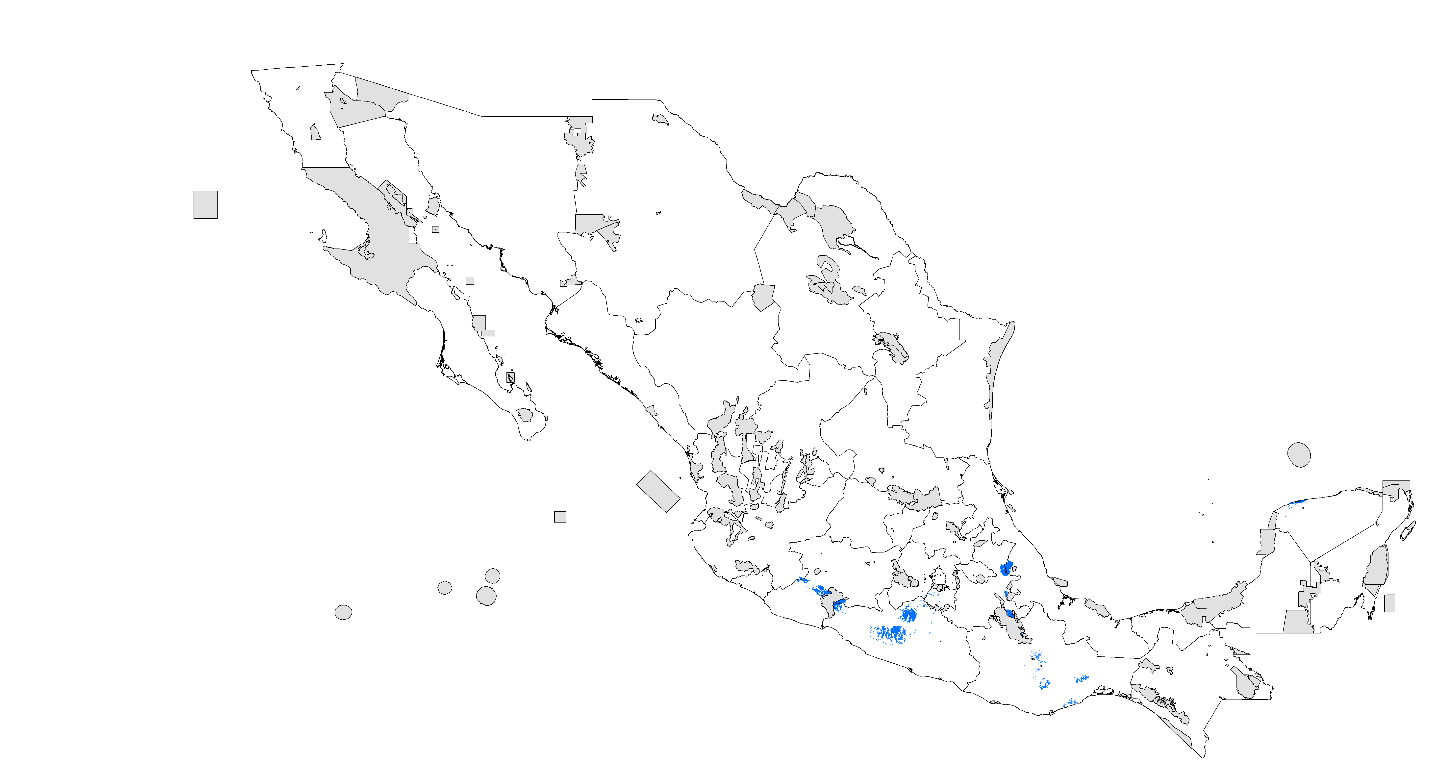


1. PDA 2080 RCP 4.5 W/m2


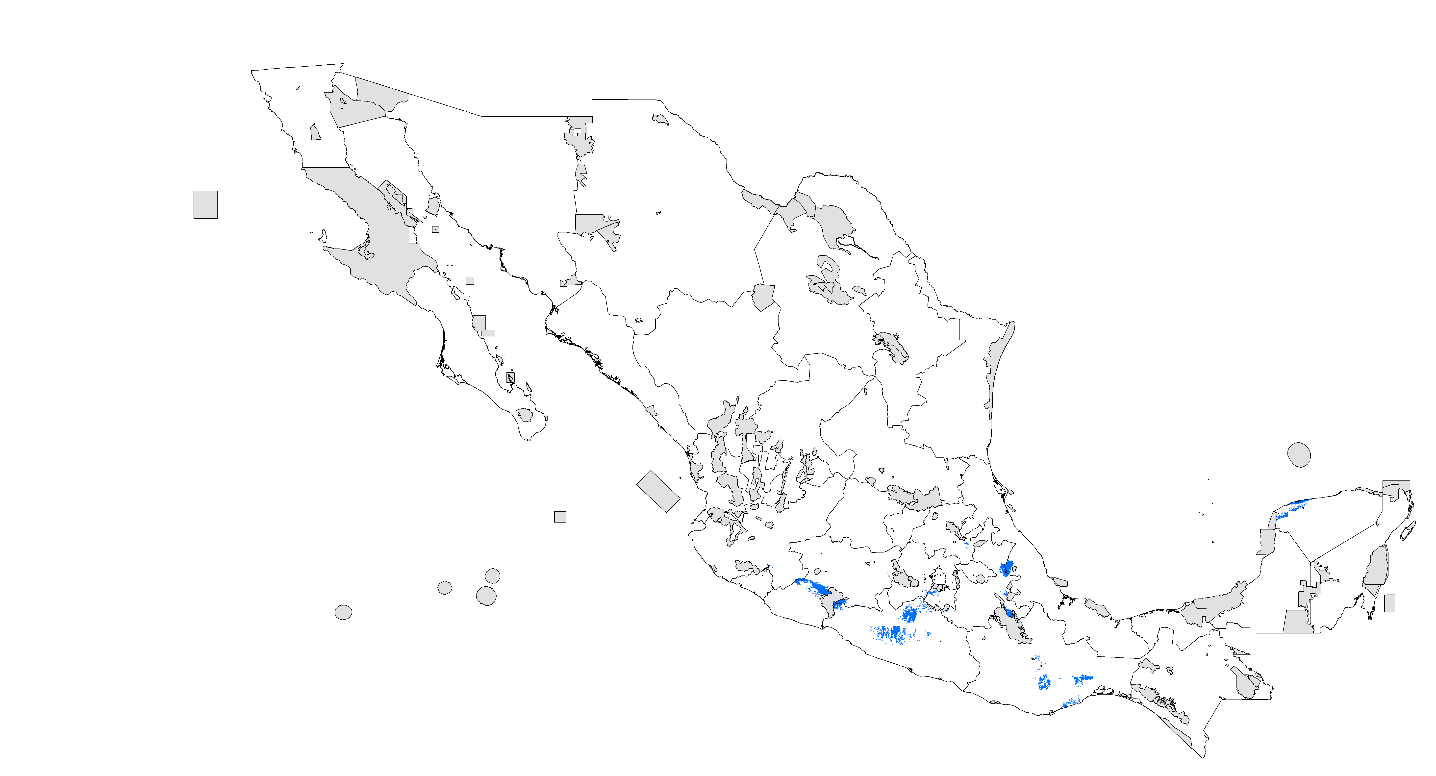


1. PDA 2080 RCP 8.5 W/m2

*
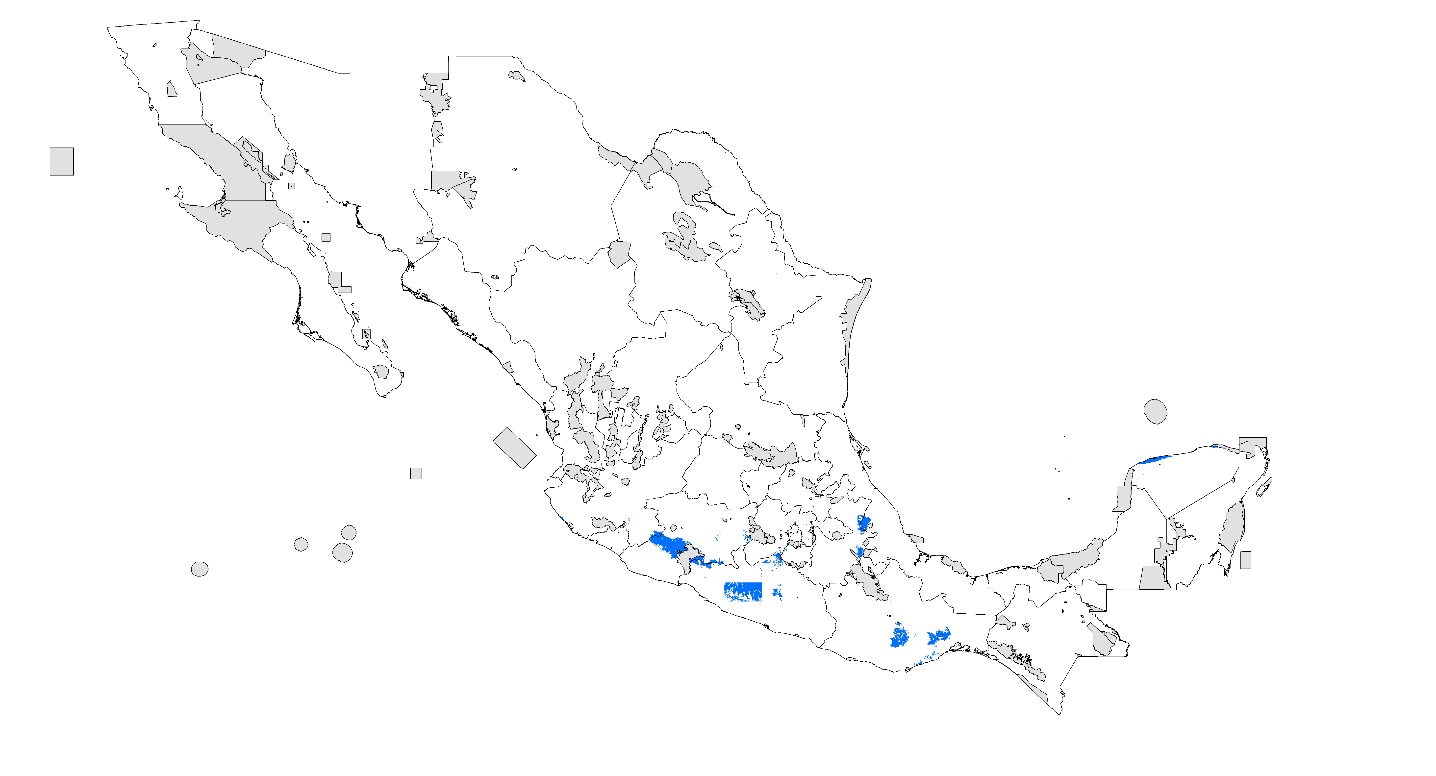
*

*Mesomexovis variegatus*

1. Records


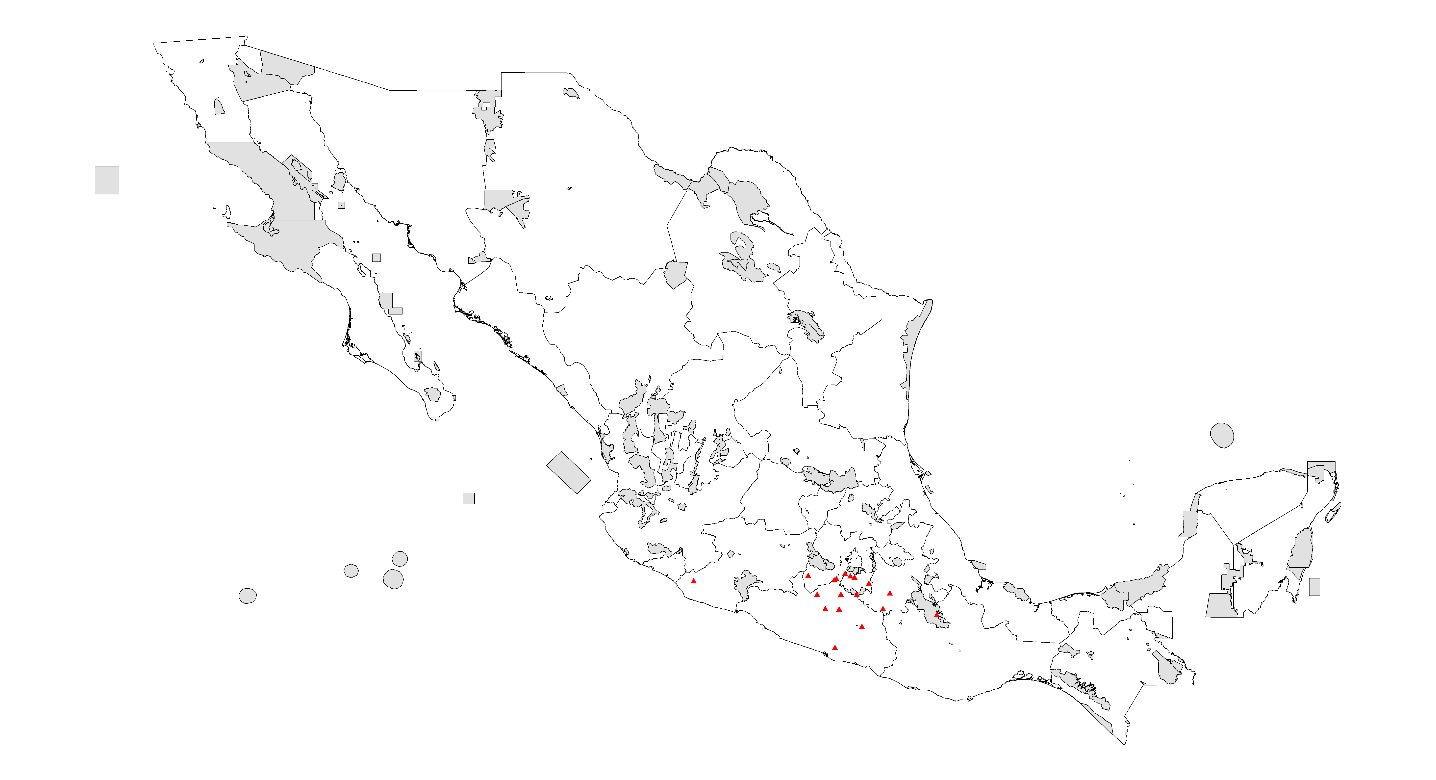


1. PDA under current climatic conditions


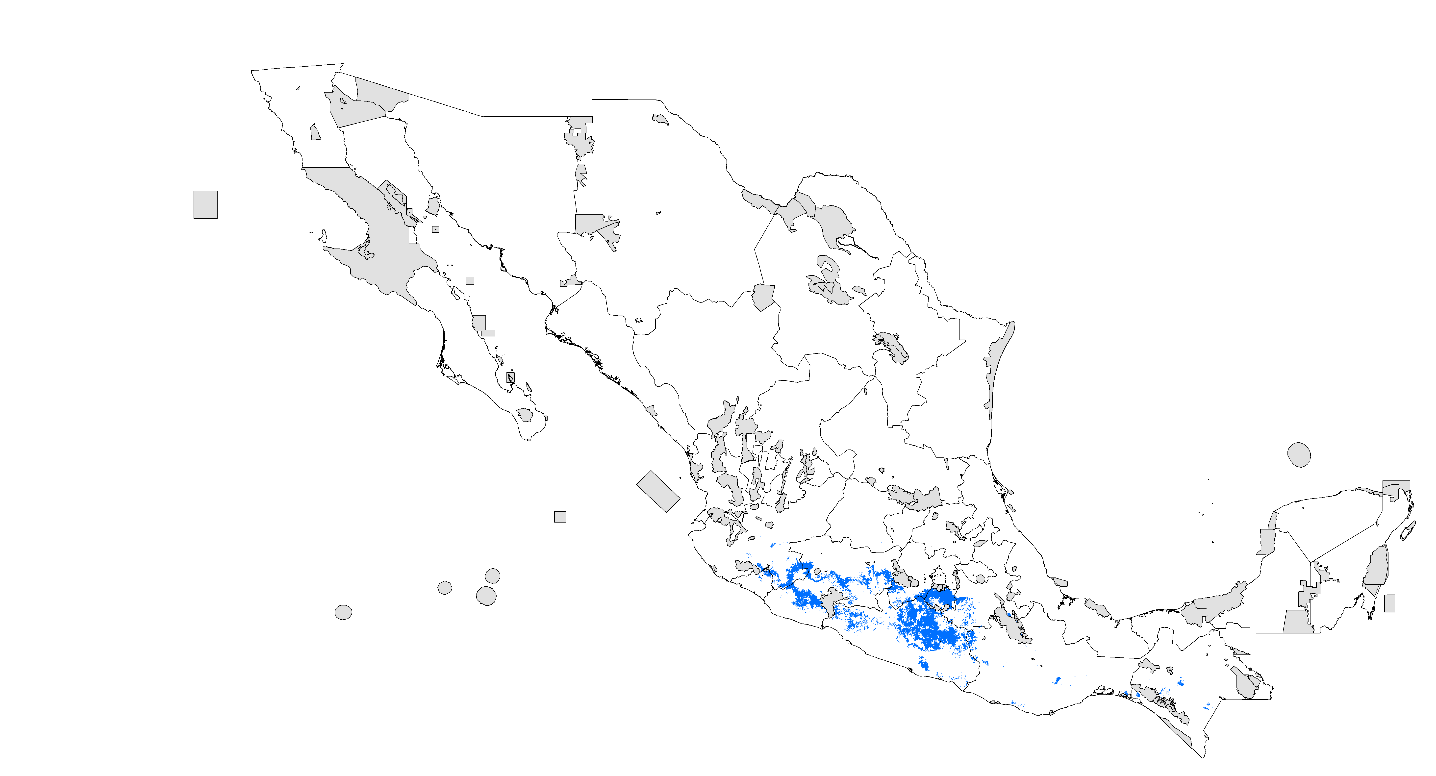


1. PDA 2020 RCP 4.5 W/m2


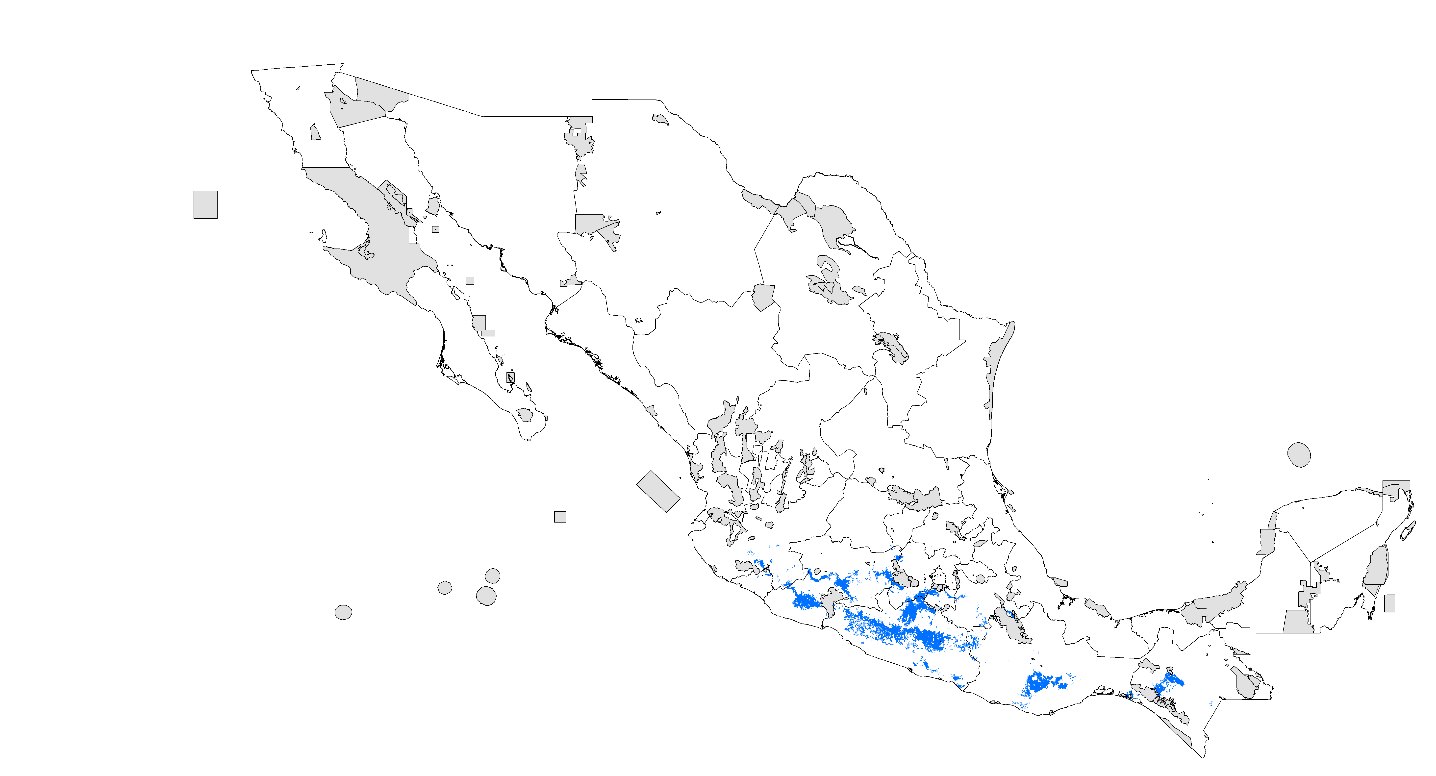


1. PDA 2020 RCP 8.5 W/m2


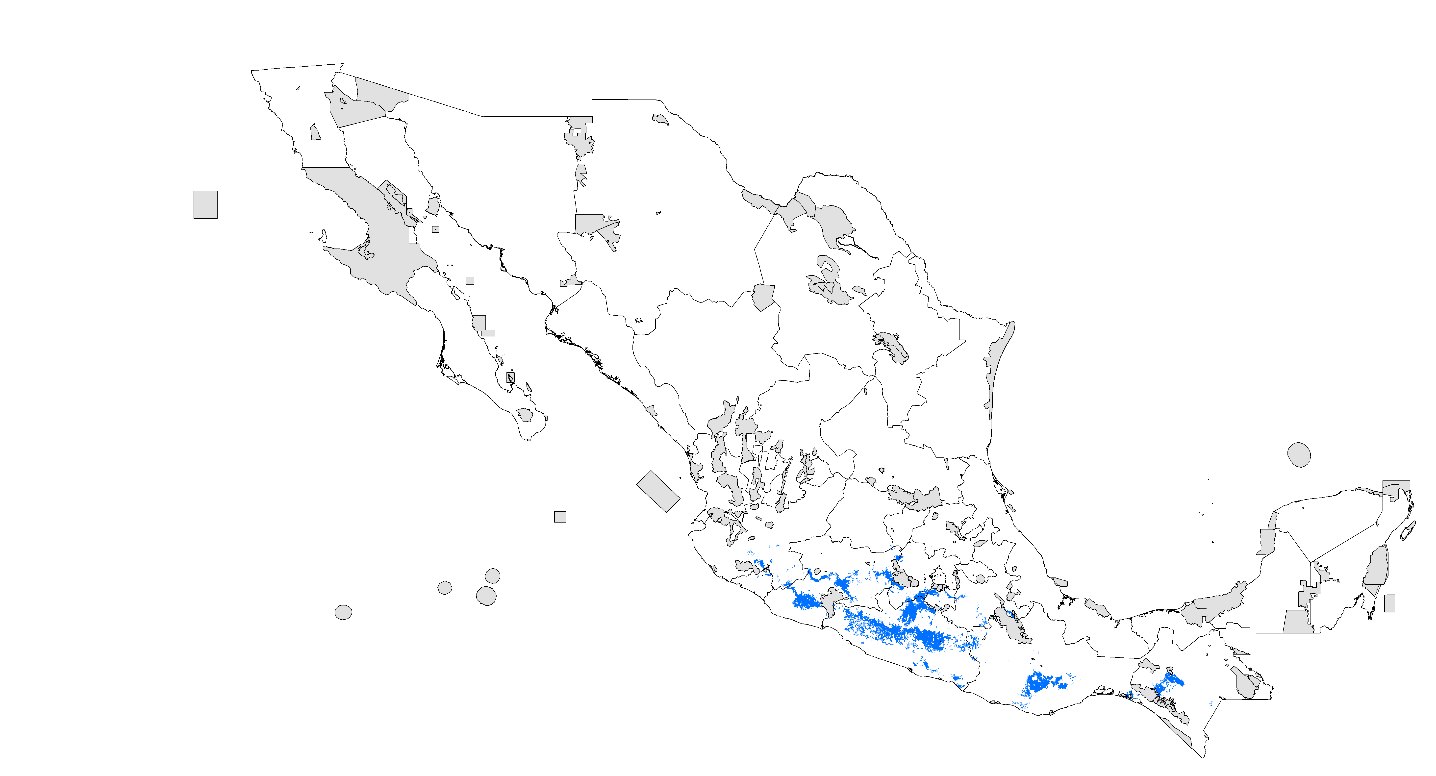


1. PDA 2080 RCP 4.5 W/m2

1. PDA 2080 RCP 8.5 W/m2

*Paravaejovis spinigerus*

1. Records

1. PDA under current climatic conditions

1. PDA 2020 RCP 4.5 W/m2

1. PDA 2020 RCP 8.5 W/m2

1. PDA 2080 RCP 4.5 W/m2

1. PDA 2080 RCP 8.5 W/m2

*Superstitiona donesis*

1. Records

1. PDA under current climatic conditions

1. PDA 2020 RCP 4.5 W/m2

1. PDA 2020 RCP 8.5 W/m2

1. PDA 2080 RCP 4.5 W/m2

1. PDA 2080 RCP 8.5 W/m2

*Thorellius cristimanus*

1. Records

1. PDA under current climatic conditions

1. PDA 2020 RCP 4.5 W/m2

1. PDA 2020 RCP 8.5 W/m2

1. PDA 2080 RCP 4.5 W/m2

1. PDA 2080 RCP 8.5 W/m2

*Thorellius intrepidus*

1. Records

1. PDA under current climatic conditions

1. PDA 2020 RCP 4.5 W/m2

1. PDA 2020 RCP 8.5 W/m2

1. PDA 2080 RCP 4.5 W/m2

1. PDA 2080 RCP 8.5 W/m2

*Vaejovis granulatus*

1. Records

1. PDA under current climatic conditions

1. PDA 2020 RCP 4.5 W/m2

1. PDA 2020 RCP 8.5 W/m2

1. PDA 2080 RCP 4.5 W/m2

1. PDA 2080 RCP 8.5 W/m2

*Vaejovis rossmanni*

1. Records

1. PDA under current climatic conditions

1. PDA 2020 RCP 4.5 W/m2

1. PDA 2020 RCP 8.5 W/m2

1. PDA 2080 RCP 4.5 W/m2

1. PDA 2080 RCP 8.5 W/m2

*Vaejovis smithi*

1. Records

1. PDA under current climatic conditions

1. PDA 2020 RCP 4.5 W/m2

1. PDA 2020 RCP 8.5 W/m2

1. PDA 2080 RCP 4.5 W/m2

1. PDA 2080 RCP 8.5 W/m2
